# Supplementary material for: Lactobacillus casei Abundance Is Associated with Profound Shifts in the Infant Gut Microbiome
Source: PLoS One. 2010 Jan 18;5(1):e8745. doi: 10.1371/journal.pone.0008745 (PMC2807455; doi:10.1371/journal.pone.0008745)
Supplement: Table S1 — Total taxa detected by PhyloChip. A list of all taxa detected by the 16S rRNA PhyloChip in all samples. (0.38 MB XLS) [file pone.0008745.s001.xls]

## Sheet: Sheet1
Phylum	Class	Order	Family	SF	Taxon ID	Accession	prokMSA Name
Acidobacteria	Acidobacteria	Acidobacteriales	Acidobacteriaceae	sf_14	89	AJ519368.1	uranium mining waste pile clone JG37-AG-31 sp.
Acidobacteria	Acidobacteria	Acidobacteriales	Acidobacteriaceae	sf_14	105	AJ535239.1	marine sediment above hydrate ridge clone Hyd24-44 sp.
Acidobacteria	Acidobacteria	Acidobacteriales	Acidobacteriaceae	sf_14	176	AJ519387.1	uranium mining waste pile clone JG37-AG-112 sp.
Acidobacteria	Acidobacteria	Acidobacteriales	Acidobacteriaceae	sf_14	208	AJ519665.1	uranium mill tailings soil sample clone GuBH2-AD-9 sp.
Acidobacteria	Acidobacteria	Acidobacteriales	Acidobacteriaceae	sf_14	209	AJ519367.1	uranium mining waste pile clone JG37-AG-29 sp.
Acidobacteria	Acidobacteria	Acidobacteriales	Acidobacteriaceae	sf_14	274	AJ519379.1	uranium mining waste pile clone JG37-AG-73 sp.
Acidobacteria	Acidobacteria	Acidobacteriales	Acidobacteriaceae	sf_14	396	Y07586.1	soil clone DA023
Acidobacteria	Acidobacteria	Acidobacteriales	Acidobacteriaceae	sf_14	508	AJ519382.1	uranium mining waste pile clone JG37-AG-81 sp.
Acidobacteria	Acidobacteria	Acidobacteriales	Acidobacteriaceae	sf_14	541	AJ519667.1	uranium mill tailings soil sample clone GuBH2-AG-47 sp.
Acidobacteria	Acidobacteria	Acidobacteriales	Acidobacteriaceae	sf_14	582	AY102321.1	heavy metal-contaminated soil clone a13114
Acidobacteria	Acidobacteria	Acidobacteriales	Acidobacteriaceae	sf_14	964	AJ519392.1	uranium mining waste pile clone JG37-AG-145 sp.
Acidobacteria	Acidobacteria	Acidobacteriales	Acidobacteriaceae	sf_14	994	AJ519389.1	uranium mining waste pile clone JG37-AG-117 sp.
Acidobacteria	Acidobacteria	Acidobacteriales	Acidobacteriaceae	sf_14	1040
Acidobacteria	Acidobacteria	Acidobacteriales	Acidobacteriaceae	sf_14	6335	AF523984.1	forested wetland clone FW45
Acidobacteria	Acidobacteria	Acidobacteriales	Acidobacteriaceae	sf_6	6345	AJ534634.1	soil sample uranium mining waste pile near town Johanngeorgenstadt clone JG36-TzT-77 bacterium
Acidobacteria	Acidobacteria	Acidobacteriales	Acidobacteriaceae	sf_14	6350	AF498719.1	soil isolate Ellin337
Acidobacteria	Acidobacteria	Acidobacteriales	Acidobacteriaceae	sf_14	6356	AF523985.1	forested wetland clone FW47
Acidobacteria	Acidobacteria	Acidobacteriales	Acidobacteriaceae	sf_6	6359	AF529322.1	PCE-contaminated site clone CLi114
Acidobacteria	Acidobacteria	Acidobacteriales	Acidobacteriaceae	sf_6	6362	Y07646.1	grassland soil clone DA052
Acidobacteria	Acidobacteria	Acidobacteriales	Acidobacteriaceae	sf_14	6364	AY234728.1	Solibacter usitatus Ellin6076
Acidobacteria	Acidobacteria	Acidobacteriales	Acidobacteriaceae	sf_14	6366	AJ292578.1	PCB-polluted soil clone WD228
Acidobacteria	Acidobacteria	Acidobacteriales	Acidobacteriaceae	sf_14	6368	AF200698.1	soil clone UA2
Acidobacteria	Acidobacteria	Acidobacteriales	Acidobacteriaceae	sf_14	6405	AJ534632.1	soil sample uranium mining waste pile near town Johanngeorgenstadt clone JG36-TzT-31 bacterium
Acidobacteria	Acidobacteria	Acidobacteriales	Acidobacteriaceae	sf_14	6407
Acidobacteria	Acidobacteria	Acidobacteriales	Acidobacteriaceae	sf_14	6410
Acidobacteria	Acidobacteria	Acidobacteriales	Acidobacteriaceae	sf_14	6412	AF047646.1	acid mine drainage clone TRB82
Acidobacteria	Acidobacteria	Acidobacteriales	Acidobacteriaceae	sf_16	6414	AF529350.1	PCE-contaminated site clone CLs73
Acidobacteria	Acidobacteria	Acidobacteriales	Acidobacteriaceae	sf_14	6421	AJ292576.1	PCB-polluted soil clone WD217
Acidobacteria	Acidobacteria	Acidobacteriales	Acidobacteriaceae	sf_6	6423	AF523979.1	coal effluent wetland clone FW92
Acidobacteria	Acidobacteria	Acidobacteriales	Acidobacteriaceae	sf_14	6424	AF524859.1	sphagnum peat bog clone K-5b10
Acidobacteria	Acidobacteria	Acidobacteriales	Acidobacteriaceae	sf_14	6425	AF407719.1	Great Artesian Basin clone B27
Acidobacteria	Acidobacteria	Holophagales	Unclassified	sf_1	734	AF529125.1	trichloroethene-contaminated site clone FTLM5 bacterium
Acidobacteria	Acidobacteria-10	Unclassified	Unclassified	sf_1	516	AJ532721.1	uranium mining waste pile clone JG34-KF-153
Acidobacteria	Acidobacteria-4	Ellin6075/11-25	Unclassified	sf_1	87	AF097766.1	activated sludge clone 2951
Acidobacteria	Acidobacteria-4	Ellin6075/11-25	Unclassified	sf_1	435	AY211077.1	anaerobic VC-degrading enrichment clone VC47 bacterium
Acidobacteria	Acidobacteria-4	Ellin6075/11-25	Unclassified	sf_1	790	Z95709.1	soil clone 11-25
Acidobacteria	Acidobacteria-4	Unclassified	Unclassified	sf_1	6348	Z95722.1	soil clone RB41
Acidobacteria	Acidobacteria-4	Unclassified	Unclassified	sf_1	6363	Z95711.1	soil clone 32-11
Acidobacteria	Acidobacteria-5	Unclassified	Unclassified	sf_1	523	AF245036.1	soil metagenomic library clone 17F9
Acidobacteria	Acidobacteria-6	Unclassified	Unclassified	sf_1	13	AJ534637.1	soil sample uranium mining waste pile near town Johanngeorgenstadt clone JG36-TzT-202 bacterium
Acidobacteria	Acidobacteria-6	Unclassified	Unclassified	sf_1	37	AY214904.2	soil clone BAC-14A1
Acidobacteria	Acidobacteria-6	Unclassified	Unclassified	sf_1	53	Z95728.1	Holophaga/Acidobacterium phylum clone iii1-15
Acidobacteria	Acidobacteria-6	Unclassified	Unclassified	sf_1	100	AJ534631.1	soil sample uranium mining waste pile near town Johanngeorgenstadt clone JG36-TzT-10
Acidobacteria	Acidobacteria-6	Unclassified	Unclassified	sf_1	500	Z95717.1	soil clone RB24
Acidobacteria	Acidobacteria-6	Unclassified	Unclassified	sf_1	569	Z95724.1	Holophaga/Acidobacterium phylum clone ii3-12
Acidobacteria	Acidobacteria-6	Unclassified	Unclassified	sf_1	642	Z95710.1	Holophaga/Acidobacterium phylum clone 32-10
Acidobacteria	Acidobacteria-6	Unclassified	Unclassified	sf_1	834	AF280856.1	bioreactor clone mle1-25
Acidobacteria	Acidobacteria-6	Unclassified	Unclassified	sf_1	897	AY221071.1	Mammoth cave clone CCM8b
Acidobacteria	Acidobacteria-6	Unclassified	Unclassified	sf_1	1049	AF013534.2	soil clone C112
Acidobacteria	Acidobacteria-7	Unclassified	Unclassified	sf_1	588	AJ009461.1	TCB-transforming consortium clone SJA-36
Acidobacteria	Acidobacteria-9	Unclassified	Unclassified	sf_1	704	AJ347029.1	sponge clone TK29
Acidobacteria	Solibacteres	Unclassified	Unclassified	sf_1	6357	AY118153.1	anaerobic benzene-degrading clone Cart-N4
Acidobacteria	Solibacteres	Unclassified	Unclassified	sf_1	6367	AF529104.1	TCE-contaminated site clone FTL227
Acidobacteria	Solibacteres	Unclassified	Unclassified	sf_1	6426	AF407714.1	Great Artesian Basin clone B11
Acidobacteria	Unclassified	Unclassified	Unclassified	sf_1	572	AF523986.1	forested wetland clone FW144
Acidobacteria	Unclassified	Unclassified	Unclassified	sf_1	4222	AF523991.1	forested wetland clone FW105
Actinobacteria	Actinobacteria	Acidimicrobiales	Acidimicrobiaceae	sf_1	1090
Actinobacteria	Actinobacteria	Acidimicrobiales	Acidimicrobiaceae	sf_1	1360	AF523917.1	forested wetland clone RCP2-103
Actinobacteria	Actinobacteria	Acidimicrobiales	Acidimicrobiaceae	sf_1	1749	AY913475.1	forest soil clone DUNssu275 (-3A) (OTU#188)
Actinobacteria	Actinobacteria	Acidimicrobiales	Acidimicrobiaceae	sf_1	1791	AY221045.1	Mammoth cave clone CCM13a
Actinobacteria	Actinobacteria	Acidimicrobiales	Acidimicrobiaceae	sf_1	1856	AF523913.1	forested wetland clone RCP2-105
Actinobacteria	Actinobacteria	Acidimicrobiales	Acidimicrobiaceae	sf_1	2014	AY093455.1	marine sediment clone MB-A2-100
Actinobacteria	Actinobacteria	Acidimicrobiales	Acidimicrobiaceae	sf_1	2030	AF523914.1	forested wetland clone RCP1-33
Actinobacteria	Actinobacteria	Acidimicrobiales	Acidimicrobiaceae	sf_1	2031	AF523909.1	forested wetland clone RCP1-83
Actinobacteria	Actinobacteria	Actinomycetales	Acidothermaceae	sf_1	1399	AJ532700.1	uranium mill tailings clone Gitt-KF-183
Actinobacteria	Actinobacteria	Actinomycetales	Actinomycetaceae	sf_1	1183	Y08828.1	Actinomyces europaeus str. CCUG 32789A
Actinobacteria	Actinobacteria	Actinomycetales	Actinomycetaceae	sf_1	1227	AB062278.1	Actinomyces naeslundii
Actinobacteria	Actinobacteria	Actinomycetales	Actinomycetaceae	sf_1	1368	AJ243893.1	Actinomyces urogenitalis
Actinobacteria	Actinobacteria	Actinomycetales	Actinomycetaceae	sf_1	1672	AJ234041.1	Actinomyces odontolyticus str. CCUG 28084
Actinobacteria	Actinobacteria	Actinomycetales	Actinomycetaceae	sf_1	1684	AJ428402.1	Varibaculum cambriense str. CCUG 44998
Actinobacteria	Actinobacteria	Actinomycetales	Actinomycetaceae	sf_1	1798	X87133.1	Bacterial sp.
Actinobacteria	Actinobacteria	Actinomycetales	Actinomycetaceae	sf_1	1801	AF487679.1	Actinobaculum massiliae str. CIP 107404
Actinobacteria	Actinobacteria	Actinomycetales	Actinomycetaceae	sf_1	2039	AJ421779.1	Actinomyces cardiffensis str. CCUG 44997
Actinobacteria	Actinobacteria	Actinomycetales	Actinomycetaceae	sf_1	2049	AJ234059.1	Arcanobacterium haemolyticum str. CIP 103370
Actinobacteria	Actinobacteria	Actinomycetales	Actinosynnemataceae	sf_1	1463	AF114815.1	Saccharothrix texasensis str. NRRL B-16107T
Actinobacteria	Actinobacteria	Actinomycetales	Actinosynnemataceae	sf_1	1951	AF114809.1	Saccharothrix longispora str. NRRL B-116116T
Actinobacteria	Actinobacteria	Bifidobacteriales	Bifidobacteriaceae	sf_1	1109	AY148470.1	Bifidobacterium thermacidophilum porcinum subsp. suis str. P3-14 subsp.
Actinobacteria	Actinobacteria	Bifidobacteriales	Bifidobacteriaceae	sf_1	1276	AB016246.1	Bifidobacterium thermophilum
Actinobacteria	Actinobacteria	Bifidobacteriales	Bifidobacteriaceae	sf_1	1335	S83624.1	Bifidobacterium bifidum
Actinobacteria	Actinobacteria	Bifidobacteriales	Bifidobacteriaceae	sf_1	1351	AY174108.1	Bifidobacterium psychraerophilum str. T16
Actinobacteria	Actinobacteria	Bifidobacteriales	Bifidobacteriaceae	sf_1	1444	AY278612.1	Bifidobacteriaceae genomosp. C1
Actinobacteria	Actinobacteria	Bifidobacteriales	Bifidobacteriaceae	sf_1	1465	X89513.1	Bifidobacterium animalis str. DSM 10140 UR1
Actinobacteria	Actinobacteria	Bifidobacteriales	Bifidobacteriaceae	sf_1	1704
Actinobacteria	Actinobacteria	Bifidobacteriales	Bifidobacteriaceae	sf_1	1835	AY513712.1	Bifidobacterium breve str. KB 92
Actinobacteria	Actinobacteria	Bifidobacteriales	Bifidobacteriaceae	sf_1	1875
Actinobacteria	Actinobacteria	Bifidobacteriales	Bifidobacteriaceae	sf_1	1967	D86187.1	Bifidobacterium pseudocatenulatum str. JCM1200
Actinobacteria	Actinobacteria	Bifidobacteriales	Bifidobacteriaceae	sf_1	2040	AF275881.1	Bifidobacterium adolescentis str. E-981074T
Actinobacteria	Actinobacteria	Actinomycetales	Brevibacteriaceae	sf_1	1745	X83813.1	Brevibacterium iodinum str. DSM 2062T
Actinobacteria	Actinobacteria	Actinomycetales	Cellulomonadaceae	sf_1	1431	AB078838.1	Cellulomonadaceae str. W6
Actinobacteria	Actinobacteria	Actinomycetales	Cellulomonadaceae	sf_1	1449	AB078851.1	Cellulomonadaceae str. WB13
Actinobacteria	Actinobacteria	Actinomycetales	Cellulomonadaceae	sf_1	1450
Actinobacteria	Actinobacteria	Actinomycetales	Cellulomonadaceae	sf_1	1586	X83800.1	Cellulomonas gelida str. DSM 20111T
Actinobacteria	Actinobacteria	Actinomycetales	Cellulomonadaceae	sf_1	1589	X83806.1	Oerskovia turbata str. DSM 20577T
Actinobacteria	Actinobacteria	Actinomycetales	Cellulomonadaceae	sf_1	1748	Y18378.1	Beutenbergia cavernosa str. DSM 12333
Actinobacteria	Actinobacteria	Actinomycetales	Cellulomonadaceae	sf_1	1780	AB023361.2	Cellulomonas sp. IFO16240 str. IFO 16240
Actinobacteria	Actinobacteria	Actinomycetales	Cellulomonadaceae	sf_1	1923	AJ229245.1	Actinobacteria str. VeCb6
Actinobacteria	Actinobacteria	Coriobacteriales	Coriobacteriaceae	sf_1	1095
Actinobacteria	Actinobacteria	Coriobacteriales	Coriobacteriaceae	sf_1	1258	AJ534678.1	ground water deep-well injection disposal site radioactive wastes Tomsk-7 clone S15A-MN25
Actinobacteria	Actinobacteria	Coriobacteriales	Coriobacteriaceae	sf_1	1294
Actinobacteria	Actinobacteria	Coriobacteriales	Coriobacteriaceae	sf_1	1382	AB011817.1	Eggerthella lenta str. JCM9979
Actinobacteria	Actinobacteria	Coriobacteriales	Coriobacteriaceae	sf_1	1459	AB089077.1	termite gut homogenate clone Rs-J59 bacterium
Actinobacteria	Actinobacteria	Coriobacteriales	Coriobacteriaceae	sf_1	1800	AJ534681.1	ground water deep-well injection disposal site radioactive wastes Tomsk-7 clone S15A-MN100
Actinobacteria	Actinobacteria	Coriobacteriales	Coriobacteriaceae	sf_1	1926	AB011815.1	Collinsella aerofaciens str. JCM7791
Actinobacteria	Actinobacteria	Coriobacteriales	Coriobacteriaceae	sf_1	2021	AB089070.1	termite gut homogenate clone Rs-D41 bacterium
Actinobacteria	Actinobacteria	Actinomycetales	Corynebacteriaceae	sf_1	1089	AF537600.1	Corynebacterium mucifaciens National Microbiology Laboratory Special identifier 01-0118
Actinobacteria	Actinobacteria	Actinomycetales	Corynebacteriaceae	sf_1	1374
Actinobacteria	Actinobacteria	Actinomycetales	Corynebacteriaceae	sf_1	1428	AF537604.1	Corynebacterium simulans National Microbiology Laboratory Special identifier 00-0186
Actinobacteria	Actinobacteria	Actinomycetales	Corynebacteriaceae	sf_1	1492	AY677186.1	Corynebacterium tuscaniae str. ISS-5309
Actinobacteria	Actinobacteria	Actinomycetales	Corynebacteriaceae	sf_1	1517	X84446.1	Corynebacterium xerosis str. DSM 20743
Actinobacteria	Actinobacteria	Actinomycetales	Corynebacteriaceae	sf_1	1803	AJ429234.1	Corynebacterium spheniscorum str. CCUG 45512
Actinobacteria	Actinobacteria	Actinomycetales	Corynebacteriaceae	sf_1	1820	U87823.1	Corynebacterium jeikeium str. ATCC 43734
Actinobacteria	Actinobacteria	Actinomycetales	Dermabacteraceae	sf_1	1446	AJ537574.1	Brachybacterium muris str. C3H-21
Actinobacteria	Actinobacteria	Actinomycetales	Dermabacteraceae	sf_1	1504	AJ415380.1	Brachybacterium sacelli str. LMG 20338
Actinobacteria	Actinobacteria	Actinomycetales	Dermabacteraceae	sf_1	1677	X91030.1	Brachybacterium conglomeratum str. NCIB 9859
Actinobacteria	Actinobacteria	Actinomycetales	Dermabacteraceae	sf_1	1736	AJ415376.1	Brachybacterium rhamnosum str. LMG 19848
Actinobacteria	Actinobacteria	Actinomycetales	Dermabacteraceae	sf_1	2053	X91033.1	Brachybacterium nesterenkovii str. DSM 9573
Actinobacteria	Actinobacteria	Actinomycetales	Dermatophilaceae	sf_1	1216	AY218605.1	penguin droppings sediments clone KD3-138
Actinobacteria	Actinobacteria	Actinomycetales	Dermatophilaceae	sf_1	1852	AB096085.1	Tonsillophilus suis str. HT1-19
Actinobacteria	Actinobacteria	Actinomycetales	Dietziaceae	sf_1	1872	X79290.1	Dietzia maris
Actinobacteria	Actinobacteria	Actinomycetales	Dietziaceae	sf_1	1970	AF481211.1	Dietzia sp. str. E9_2
Actinobacteria	Actinobacteria	Actinomycetales	Frankiaceae	sf_1	1105	AF063641.1	Frankia sp
Actinobacteria	Actinobacteria	Actinomycetales	Frankiaceae	sf_1	1161	AJ408876.1	Frankia sp. MRn2-2
Actinobacteria	Actinobacteria	Actinomycetales	Frankiaceae	sf_1	1286	AJ408875.1	Frankia sp. Sn5-8
Actinobacteria	Actinobacteria	Actinomycetales	Frankiaceae	sf_1	1644	AJ408870.1	Frankia sp. M16467
Actinobacteria	Actinobacteria	Actinomycetales	Geodermatophilaceae	sf_1	1694	X92355.1	Geodermatophilus obscurus subsp. dictyosporus str. DSM 43161
Actinobacteria	Actinobacteria	Actinomycetales	Gordoniaceae	sf_1	1184	AB065369.1	Gordonia alkanivorans
Actinobacteria	Actinobacteria	Actinomycetales	Gordoniaceae	sf_1	1191	X80635.1	Gordonia amarae str. DSM43392
Actinobacteria	Actinobacteria	Actinomycetales	Gordoniaceae	sf_1	1545
Actinobacteria	Actinobacteria	Actinomycetales	Gordoniaceae	sf_1	1567
Actinobacteria	Actinobacteria	Actinomycetales	Gordoniaceae	sf_1	1654	AF416719.1	Gordonia polyisoprenivorans str. Y2K
Actinobacteria	Actinobacteria	Actinomycetales	Intrasporangiaceae	sf_1	1225	AB030911.1	Tetrasphaera elongata str. Lp2
Actinobacteria	Actinobacteria	Actinomycetales	Kineosporiaceae	sf_1	1087	AB003931.1	Kineosporia aurantiaca str. JCM3230
Actinobacteria	Actinobacteria	Actinomycetales	Kineosporiaceae	sf_1	1581	AJ293746.1	Cryptosporangium aurantiacum str. IMSNU 22120
Actinobacteria	Actinobacteria	Actinomycetales	Kineosporiaceae	sf_1	1598	AY250880.1	lichen-dominated Antarctic cryptoendolithic community clone FBP402
Actinobacteria	Actinobacteria	Actinomycetales	Kineosporiaceae	sf_1	1893	AF095336.1	Kineosporia aurantiaca str. NRLL B-16913
Actinobacteria	Actinobacteria	Actinomycetales	Kineosporiaceae	sf_1	1961	X77958.1	Kineococcus aurantiacus str. IFO 15268
Actinobacteria	Actinobacteria	Actinomycetales	Kribbella	sf_1	1839	AY253862.1	Kribbella solani str. DSA1
Actinobacteria	Actinobacteria	Actinomycetales	Microbacteriaceae	sf_1	1106
Actinobacteria	Actinobacteria	Actinomycetales	Microbacteriaceae	sf_1	1135	AJ459101.1	Rhodoglobus vestalii str. LV3
Actinobacteria	Actinobacteria	Actinomycetales	Microbacteriaceae	sf_1	1186	AF505514.1	Cryocola antiquus str. VKM 103PF
Actinobacteria	Actinobacteria	Actinomycetales	Microbacteriaceae	sf_1	1197	AF468440.1	Arctic sea ice ARK10173
Actinobacteria	Actinobacteria	Actinomycetales	Microbacteriaceae	sf_1	1241	AJ717353.1	Microbacterium kitamiense CV88
Actinobacteria	Actinobacteria	Actinomycetales	Microbacteriaceae	sf_1	1404	AJ507468.1	freshwater isolate str. MWH-Ta3
Actinobacteria	Actinobacteria	Actinomycetales	Microbacteriaceae	sf_1	1437	AJ575522.1	freshwater clone SV1-16
Actinobacteria	Actinobacteria	Actinomycetales	Microbacteriaceae	sf_1	1513	AF263565.1	Microbacterium gubbeenense str. DPC 5284
Actinobacteria	Actinobacteria	Actinomycetales	Microbacteriaceae	sf_1	1667	AB007415.1	Microbacterium lacticum
Actinobacteria	Actinobacteria	Actinomycetales	Microbacteriaceae	sf_1	1705
Actinobacteria	Actinobacteria	Actinomycetales	Microbacteriaceae	sf_1	1758	AF479358.1	glacial ice isolate str. SB12K-2-1
Actinobacteria	Actinobacteria	Actinomycetales	Microbacteriaceae	sf_1	1779	AB042083.1	Microbacterium sp. str. VKM Ac-2048
Actinobacteria	Actinobacteria	Actinomycetales	Microbacteriaceae	sf_1	1804	AY244784.1	Microbacterium resistens str. 2002-59119
Actinobacteria	Actinobacteria	Actinomycetales	Microbacteriaceae	sf_1	1921	AJ292036.1	Firmicutes isolate str. d8
Actinobacteria	Actinobacteria	Actinomycetales	Micrococcaceae	sf_1	1213	X87756.1	Kocuria roseus
Actinobacteria	Actinobacteria	Actinomycetales	Micrococcaceae	sf_1	1266	AF134179.1	Arthrobacter psychrolactophilus
Actinobacteria	Actinobacteria	Actinomycetales	Micrococcaceae	sf_1	1324	AF479325.1	glacial ice isolate str. CanDirty1
Actinobacteria	Actinobacteria	Actinomycetales	Micrococcaceae	sf_1	1494	X80748.1	Arthrobacter agilis str. DSM 20550
Actinobacteria	Actinobacteria	Actinomycetales	Micrococcaceae	sf_1	1557	X83408.1	Arthrobacter oxydans str. DSM 20119
Actinobacteria	Actinobacteria	Actinomycetales	Micrococcaceae	sf_1	1573	AJ315492.1	Arthrobacter nicotianae str. SB42
Actinobacteria	Actinobacteria	Actinomycetales	Micrococcaceae	sf_1	1582	AY053487.1	gas hydrate clone AT425_EubD11
Actinobacteria	Actinobacteria	Actinomycetales	Micrococcaceae	sf_1	1593	M23411.1	Arthrobacter globiformis
Actinobacteria	Actinobacteria	Actinomycetales	Micrococcaceae	sf_1	1610	X86595.1	Arthrobacter sp str. AC-51
Actinobacteria	Actinobacteria	Actinomycetales	Micrococcaceae	sf_1	1686	AY228479.1	Yania halotolerans str. YIM 70085
Actinobacteria	Actinobacteria	Actinomycetales	Micrococcaceae	sf_1	1724	X95483.1	Rothia mucilaginosa str. DSM
Actinobacteria	Actinobacteria	Actinomycetales	Micrococcaceae	sf_1	1889	AB094464.1	Citricoccus sp. str. 2216.25.22
Actinobacteria	Actinobacteria	Actinomycetales	Micrococcaceae	sf_1	1966	AY133106.1	TCE-contaminated site clone ccspost2208
Actinobacteria	Actinobacteria	Actinomycetales	Micrococcaceae	sf_1	2019	AF057289.1	Micrococcus luteus str. HN2-11
Actinobacteria	Actinobacteria	Actinomycetales	Micromonosporaceae	sf_1	1159	AJ277568.1	Actinoplanes durhamensis str. IMSNU 22124T
Actinobacteria	Actinobacteria	Actinomycetales	Micromonosporaceae	sf_1	1488	AJ277574.1	Actinoplanes utahensis str. IMSNU 20044T
Actinobacteria	Actinobacteria	Actinomycetales	Micromonosporaceae	sf_1	1542	AJ277575.1	Actinoplanes garbadinensis str. IMSNU 20040
Actinobacteria	Actinobacteria	Actinomycetales	Micromonosporaceae	sf_1	1615	AB036999.1	Actinoplanes derwentensis str. IFO 14935T
Actinobacteria	Actinobacteria	Actinomycetales	Micromonosporaceae	sf_1	1633	AJ277585.1	Actinoplanes tuftoflagellus str. IMSNU 22135
Actinobacteria	Actinobacteria	Actinomycetales	Micromonosporaceae	sf_1	1641	AB196714.1	Micromonospora marina str. JSM3-1
Actinobacteria	Actinobacteria	Actinomycetales	Micromonosporaceae	sf_1	1689	AB047516.1	Actinoplanes yunnanensis str. IFO 14459T
Actinobacteria	Actinobacteria	Actinomycetales	Micromonosporaceae	sf_1	1760	AJ277583.1	Actinoplanes roseosporangius str. IMSNU 22133
Actinobacteria	Actinobacteria	Actinomycetales	Micromonosporaceae	sf_1	1766	X93195.1	Dactylosporangium salmoneum str. DSM 43910
Actinobacteria	Actinobacteria	Actinomycetales	Micromonosporaceae	sf_1	1910	AB013495.2	Actinoplanes capillaceus str. K95-5561
Actinobacteria	Actinobacteria	Actinomycetales	Micromonosporaceae	sf_1	1931	X80823.1	Actinoplanes utahensis str. ATCC 31044
Actinobacteria	Actinobacteria	Actinomycetales	Micromonosporaceae	sf_1	1972	AB037011.1	Actinoplanes regularis str. IFO 12514T
Actinobacteria	Actinobacteria	Actinomycetales	Micromonosporaceae	sf_1	2051	D85479.1	Couchioplanes subsp. caeruleus str. IFO13939
Actinobacteria	Actinobacteria	Acidimicrobiales	Microthrixineae	sf_1	1576	AF454307.1	actinobacterium clone ML817J-10
Actinobacteria	Actinobacteria	Acidimicrobiales	Microthrixineae	sf_1	1964	AF406548.1	bacterioplankton clone AEGEAN_247
Actinobacteria	Actinobacteria	Actinomycetales	Mycobacteriaceae	sf_1	1175	AJ243481.1	Mycobacterium cf. xenopi 'Hymi_Wue Tb_939/99' str. Hymi_Wue Tb_939/99
Actinobacteria	Actinobacteria	Actinomycetales	Mycobacteriaceae	sf_1	1204	M95488.1	Mycobacterium sp. 3
Actinobacteria	Actinobacteria	Actinomycetales	Mycobacteriaceae	sf_1	1239	AJ271863.1	Mycobacterium ratisbonense str. SD4
Actinobacteria	Actinobacteria	Actinomycetales	Mycobacteriaceae	sf_1	1262	AJ310467.1	Mycobacterium holsaticum str. 1406
Actinobacteria	Actinobacteria	Actinomycetales	Mycobacteriaceae	sf_1	1308	AJ431371.1	Mycobacterium pyrenivorans str. DSM 44605
Actinobacteria	Actinobacteria	Actinomycetales	Mycobacteriaceae	sf_1	1365	AY457072.1	Mycobacterium chelonae str. CIP 104535T
Actinobacteria	Actinobacteria	Actinomycetales	Mycobacteriaceae	sf_1	1650	X58890.1	Mycobacterium tuberculosis str. NCTC 7416 H37Rv
Actinobacteria	Actinobacteria	Actinomycetales	Mycobacteriaceae	sf_1	1681	AY227356.1	Mycobacterium sp. str. 1B(CD)
Actinobacteria	Actinobacteria	Actinomycetales	Mycobacteriaceae	sf_1	1726	X52925.1	Mycobacterium terrae str. ATCC 15755
Actinobacteria	Actinobacteria	Actinomycetales	Mycobacteriaceae	sf_1	1781	AF498650.1	Mycobacterium rhodesiae str. JS60
Actinobacteria	Actinobacteria	Actinomycetales	Mycobacteriaceae	sf_1	1885	AF480593.1	Mycobacterium neoaurum str. ATCC 25795
Actinobacteria	Actinobacteria	Actinomycetales	Mycobacteriaceae	sf_1	2034	X79094.1	Mycobacterium chlorophenolicum str. PCP-I
Actinobacteria	Actinobacteria	Actinomycetales	Nocardiaceae	sf_1	1142
Actinobacteria	Actinobacteria	Actinomycetales	Nocardiaceae	sf_1	1146	AF430068.1	Nocardia otitidiscaviarum str. S639
Actinobacteria	Actinobacteria	Actinomycetales	Nocardiaceae	sf_1	1177	Z36929.1	Nocardia carnea str. DSM 43397()
Actinobacteria	Actinobacteria	Actinomycetales	Nocardiaceae	sf_1	1304	AF421564.1	Nocardia sp. str. 99-08-244A
Actinobacteria	Actinobacteria	Actinomycetales	Nocardiaceae	sf_1	1432	AF430055.1	Nocardia veterana str. DSM 44445
Actinobacteria	Actinobacteria	Actinomycetales	Nocardiaceae	sf_1	1454	AB092561.1	Nocardia yamanashiensis str. IFM 0265
Actinobacteria	Actinobacteria	Actinomycetales	Nocardiaceae	sf_1	1769	AF430064.1	Nocardia sp. str. DSM 46067
Actinobacteria	Actinobacteria	Actinomycetales	Nocardiaceae	sf_1	1787	AF430046.1	Nocardia pseudovaccinii str. DSM 43406
Actinobacteria	Actinobacteria	Actinomycetales	Nocardiaceae	sf_1	1788	U20791.1	Rhodococcus species
Actinobacteria	Actinobacteria	Actinomycetales	Nocardiaceae	sf_1	1805	AJ303008.1	Nocardia ignorata str. IMMIB R-1434 DSM 44496 = NRRL B-24141
Actinobacteria	Actinobacteria	Actinomycetales	Nocardiaceae	sf_1	1834	AF430047.1	Nocardia transvalensis str. DSM 43405
Actinobacteria	Actinobacteria	Actinomycetales	Nocardiaceae	sf_1	1917	X80611.1	Nocardia otitidiscaviarum str. DSM43242
Actinobacteria	Actinobacteria	Actinomycetales	Nocardiaceae	sf_1	1940	AB178563.1	Rhodococcus opacus str. B-4
Actinobacteria	Actinobacteria	Actinomycetales	Nocardiaceae	sf_1	2048	AF430044.1	Nocardia uniformis str. DSM 43136
Actinobacteria	Actinobacteria	Actinomycetales	Nocardiopsaceae	sf_1	1385	AF178988.1	Streptomonospora salina str. YIM90002
Actinobacteria	Actinobacteria	Actinomycetales	Promicromonosporaceae	sf_1	1671	X79453.1	Cellulosimicrobium cellulans str. NCIMB 11025
Actinobacteria	Actinobacteria	Actinomycetales	Promicromonosporaceae	sf_1	1711	AJ272024.1	Promicromonospora sukumoe str. DSM 44121
Actinobacteria	Actinobacteria	Actinomycetales	Pseudonocardiaceae	sf_1	1343	Z38017.1	Saccharomonospora azurea str. M.Goodfel K161=NA128 (type st
Actinobacteria	Actinobacteria	Actinomycetales	Pseudonocardiaceae	sf_1	1402
Actinobacteria	Actinobacteria	Actinomycetales	Pseudonocardiaceae	sf_1	1824	AJ293756.1	Amycolatopsis sulphurea str. IMSNU 20060T
Actinobacteria	Actinobacteria	Actinomycetales	Pseudonocardiaceae	sf_1	1849
Actinobacteria	Actinobacteria	Actinomycetales	Pseudonocardiaceae	sf_1	1863
Actinobacteria	Actinobacteria	Actinomycetales	Pseudonocardiaceae	sf_1	1904
Actinobacteria	Actinobacteria	Rubrobacterales	Rubrobacteraceae	sf_1	1384
Actinobacteria	Actinobacteria	Rubrobacterales	Rubrobacteraceae	sf_1	1551	AF498683.1	soil isolate Ellin301
Actinobacteria	Actinobacteria	Rubrobacterales	Rubrobacteraceae	sf_1	1739
Actinobacteria	Actinobacteria	Rubrobacterales	Rubrobacteraceae	sf_1	1843	AJ536866.1	uranium mining waste pile soil sample clone JG30-KF-A23
Actinobacteria	Actinobacteria	Rubrobacterales	Rubrobacteraceae	sf_1	1901	AY039806.1	earthworm burrow isolate B33D1
Actinobacteria	Actinobacteria	Actinomycetales	Sporichthyaceae	sf_1	1695	AY250883.1	lichen-dominated Antarctic cryptoendolithic community clone FBP417
Actinobacteria	Actinobacteria	Actinomycetales	Streptomycetaceae	sf_1	1128	AY236339.1	Streptomyces sp. str. YIM 80305
Actinobacteria	Actinobacteria	Actinomycetales	Streptomycetaceae	sf_1	1274	AB006154.1	Trichotomospora caesia str. IFO14562
Actinobacteria	Actinobacteria	Actinomycetales	Streptomycetaceae	sf_1	1340	Y00411.1	Streptomyces coelicolor
Actinobacteria	Actinobacteria	Actinomycetales	Streptomycetaceae	sf_1	1354	X80825.1	Streptomyces subrutilus str. DSM 40445
Actinobacteria	Actinobacteria	Actinomycetales	Streptomycetaceae	sf_1	1375	AF423240.1	soil clone 228-1
Actinobacteria	Actinobacteria	Actinomycetales	Streptomycetaceae	sf_1	1544	AB022872.1	Kitasatospora cystarginea str. IFO14836T
Actinobacteria	Actinobacteria	Actinomycetales	Streptomycetaceae	sf_1	1569	D63871.1	Streptomyces sampsonii str. ATCC25495
Actinobacteria	Actinobacteria	Actinomycetales	Streptomycetaceae	sf_1	1617	AF423260.1	soil clone 41-1
Actinobacteria	Actinobacteria	Actinomycetales	Streptomycetaceae	sf_1	1639	X60514.1	Streptomyces coelicolor str. M145 ssp. A3(2)
Actinobacteria	Actinobacteria	Actinomycetales	Streptomycetaceae	sf_1	1690	X79325.1	Streptomyces galbus str. DSM40480
Actinobacteria	Actinobacteria	Actinomycetales	Streptomycetaceae	sf_3	1743	AB026214.1	Streptomyces scabiei str. DNK-G01
Actinobacteria	Actinobacteria	Actinomycetales	Streptomycetaceae	sf_1	1771	D63872.1	Streptomyces setonii str. ATCC25497
Actinobacteria	Actinobacteria	Actinomycetales	Streptomycetaceae	sf_1	1786	X79851.1	Streptomyces bikiniensis str. DSM40581
Actinobacteria	Actinobacteria	Actinomycetales	Streptomycetaceae	sf_1	1983	AJ399487.1	Streptomyces cinnabarinus str. ISP 5467
Actinobacteria	Actinobacteria	Actinomycetales	Streptosporangiaceae	sf_1	1158	X89947.1	Streptosporangium roseum str. DSM43021T
Actinobacteria	Actinobacteria	Actinomycetales	Streptosporangiaceae	sf_1	1189	AF191734.1	Streptosporangium subroseum str. 7113
Actinobacteria	Actinobacteria	Actinomycetales	Streptosporangiaceae	sf_1	1190	U48977.1	Nonomuraea polychroma str. IFO 14345
Actinobacteria	Actinobacteria	Actinomycetales	Streptosporangiaceae	sf_1	1224	X89941.1	Acrocarpospora corrugata str. DSM43316T
Actinobacteria	Actinobacteria	Actinomycetales	Streptosporangiaceae	sf_1	1505	U48986.1	Microbispora rosea subsp. aerata str. ATCC 27098
Actinobacteria	Actinobacteria	Actinomycetales	Streptosporangiaceae	sf_1	1587	AB039960.1	Nonomuraea subsp. roseoviolacea str. SF 2303
Actinobacteria	Actinobacteria	Actinomycetales	Streptosporangiaceae	sf_1	2037	AF302078.1	Nonomuraea terrinata str. DSM 44505
Actinobacteria	Actinobacteria	Actinomycetales	Thermomonosporaceae	sf_1	1406	X97890.1	Actinomadura kijaniata str. DSM 43764T
Actinobacteria	Actinobacteria	Actinomycetales	Thermomonosporaceae	sf_1	1546	AJ420137.1	Actinomadura fulvescens str. DSM 43923T
Actinobacteria	Actinobacteria	Actinomycetales	Thermomonosporaceae	sf_1	1669	AF223348.1	Pseudonocardiaceae str. PA123
Actinobacteria	Actinobacteria	Actinomycetales	Thermomonosporaceae	sf_1	1741	AJ293710.1	Actinomadura pelletieri str. IMSNU 22169T
Actinobacteria	Actinobacteria	Actinomycetales	Unclassified	sf_3	1130	X94155.2	Georgenia muralis str. 1A-C
Actinobacteria	Actinobacteria	Actinomycetales	Unclassified	sf_3	1201	AJ347031.1	sponge clone TK39
Actinobacteria	Actinobacteria	Acidimicrobiales	Unclassified	sf_1	1217	AJ306762.2	DCP-dechlorinating consortium clone SHA-34
Actinobacteria	Actinobacteria	Unclassified	Unclassified	sf_2	1233
Actinobacteria	Actinobacteria	Actinomycetales	Unclassified	sf_3	1243	AB089076.1	termite gut homogenate clone Rs-M95 bacterium
Actinobacteria	Actinobacteria	Actinomycetales	Unclassified	sf_3	1296	AB089080.1	termite gut homogenate clone Rs-M66 bacterium
Actinobacteria	Actinobacteria	Actinomycetales	Unclassified	sf_4	1337	AF234118.1	Sturt arid-zone soil clone #0425-2M17
Actinobacteria	Actinobacteria	Actinomycetales	Unclassified	sf_3	1348	AY250882.1	lichen-dominated Antarctic cryptoendolithic community clone FBP406
Actinobacteria	Actinobacteria	Unclassified	Unclassified	sf_1	1367
Actinobacteria	Actinobacteria	Unclassified	Unclassified	sf_1	1370	AF523912.1	forested wetland clone RCP1-37
Actinobacteria	Actinobacteria	Actinomycetales	Unclassified	sf_3	1405	X80744.1	Arthrobacter ureafaciens str. DSM 20126
Actinobacteria	Actinobacteria	Actinomycetales	Unclassified	sf_3	1486	AY093463.1	deep marine sediment clone MB-A2-108
Actinobacteria	Actinobacteria	Actinomycetales	Unclassified	sf_3	1514
Actinobacteria	Actinobacteria	Actinomycetales	Unclassified	sf_3	1577	AB089072.1	termite gut homogenate clone Rs-N91 bacterium
Actinobacteria	Actinobacteria	Acidimicrobiales	Unclassified	sf_1	1666
Actinobacteria	Actinobacteria	Unclassified	Unclassified	sf_1	1676
Actinobacteria	Actinobacteria	Actinomycetales	Unclassified	sf_3	1687	AJ626896.1	Jonesia quinghaiensis str. DSM 15701
Actinobacteria	Actinobacteria	Actinomycetales	Unclassified	sf_3	1822	AY145533.1	dilution (10e-7) brackish section Weser estuary isolate str. GP-5 GP-5
Actinobacteria	Actinobacteria	Unclassified	Unclassified	sf_1	1898	AB089074.1	termite gut homogenate clone Rs-J10 bacterium
Actinobacteria	Actinobacteria	Actinomycetales	Unclassified	sf_3	2045	AF507852.1	hypersaline lake clone ML602J-44
Actinobacteria	BD2-10 group	Unclassified	Unclassified	sf_2	1562	AB015539.1	deep-sea sediment clone BD2-10
Actinobacteria	BD2-10 group	Unclassified	Unclassified	sf_2	1652	AY193208.1	marine sediment clone Bol7
Actinobacteria	BD2-10 group	Unclassified	Unclassified	sf_1	1732	AF406543.1	bacterioplankton clone AEGEAN_163
AD3	Unclassified	Unclassified	Unclassified	sf_1	2338	AJ536867.1	uranium mining waste pile soil clone JG30-KF-C12
Aquificae	Aquificae	Aquificales	Aquificaceae	sf_1	445	AB026268.1	Hydrogenobacter subterraneus str. HGP1
Aquificae	Aquificae	Aquificales	Hydrogenothermaceae	sf_1	220	AF018192.1	hot spring clone env.OPS7
Aquificae	Aquificae	Aquificales	Hydrogenothermaceae	sf_1	737	AF528192.1	Sulfurihydrogenibium azorense
Aquificae	Aquificae	Aquificales	Unclassified	sf_1	2364	AY263403.1	Thermovibrio ammoniificans str. HB-1
Bacteroidetes	Bacteroidetes	Bacteroidales	Bacteroidaceae	sf_12	5256	AB088925.1	termite gut homogenate clone Rs-D38 bacterium
Bacteroidetes	Bacteroidetes	Bacteroidales	Bacteroidaceae	sf_12	5264
Bacteroidetes	Bacteroidetes	Bacteroidales	Bacteroidaceae	sf_12	5275	AY570561.1	biodegraded Canadian oil reservoir clone PL-26B10
Bacteroidetes	Bacteroidetes	Bacteroidales	Bacteroidaceae	sf_12	5285	X83953.1	Bacteroides stercoris str. ATCC 43183T
Bacteroidetes	Bacteroidetes	Bacteroidales	Bacteroidaceae	sf_12	5320	M86695.1	Bacteroides distasonis
Bacteroidetes	Bacteroidetes	Bacteroidales	Bacteroidaceae	sf_12	5450	X89217.1	Bacteroides sp str. BV-1
Bacteroidetes	Bacteroidetes	Bacteroidales	Bacteroidaceae	sf_12	5474	AB021159.1	Bacteroides acidofaciens str.A24
Bacteroidetes	Bacteroidetes	Bacteroidales	Bacteroidaceae	sf_12	5489	X83951.1	Bacteroides caccae str. ATCC 43185T
Bacteroidetes	Bacteroidetes	Bacteroidales	Bacteroidaceae	sf_12	5551	L16486.1	Bacteroides uniformis
Bacteroidetes	Bacteroidetes	Bacteroidales	Bacteroidaceae	sf_12	5621	AY217430.1	TCE-dechlorinating microbial community clone 3G
Bacteroidetes	Bacteroidetes	Bacteroidales	Bacteroidaceae	sf_6	5792	AF513095.1	activated sludge foam clone 47
Bacteroidetes	Bacteroidetes	Bacteroidales	Bacteroidaceae	sf_12	5837	AF132263.1	adult human fecal matter clone adhufec355
Bacteroidetes	Bacteroidetes	Bacteroidales	Bacteroidaceae	sf_12	5950
Bacteroidetes	Bacteroidetes	Bacteroidales	Bacteroidaceae	sf_12	5979	AP006841.1	Bacteroides fragilis str. YCH46
Bacteroidetes	Bacteroidetes	Bacteroidales	Bacteroidaceae	sf_12	6064	AE016933.1	Bacteroides thetaiotaomicron str. VPI-5482 VPI-5482
Bacteroidetes	Bacteroidetes	Bacteroidales	Bacteroidaceae	sf_12	6309	AY126616.1	isolate str. SMARLAB 84634
Bacteroidetes	Bacteroidetes	Bacteroidales	Porphyromonadaceae	sf_1	5295	AF371910.1	swine intestine clone p-987-s962-5
Bacteroidetes	Bacteroidetes	Bacteroidales	Porphyromonadaceae	sf_1	5429
Bacteroidetes	Bacteroidetes	Bacteroidales	Porphyromonadaceae	sf_1	5454	AY643492.1	Dysgonomonas wimpennyi str. ANFA2
Bacteroidetes	Bacteroidetes	Bacteroidales	Porphyromonadaceae	sf_1	5460	AJ400267.2	mouse feces clone F8
Bacteroidetes	Bacteroidetes	Bacteroidales	Porphyromonadaceae	sf_1	5510	AF524856.1	sphagnum peat bog clone 26-4b2
Bacteroidetes	Bacteroidetes	Bacteroidales	Porphyromonadaceae	sf_1	5806	AY169416.1	Bacteroides merdae
Bacteroidetes	Bacteroidetes	Bacteroidales	Porphyromonadaceae	sf_1	5817	AB088927.2	termite gut homogenate clone Rs-N56 bacterium
Bacteroidetes	Bacteroidetes	Bacteroidales	Porphyromonadaceae	sf_1	5961	AJ488070.1	chlorobenzene-degrading consortium clone IA-16
Bacteroidetes	Bacteroidetes	Bacteroidales	Porphyromonadaceae	sf_1	6012	AJ400264.1	mouse feces clone L11-6
Bacteroidetes	Bacteroidetes	Bacteroidales	Prevotellaceae	sf_1	5398	AY699286.1	Prevotella ruminicola L16
Bacteroidetes	Bacteroidetes	Bacteroidales	Prevotellaceae	sf_1	5437	AY244919.1	cow rumen clone BE1
Bacteroidetes	Bacteroidetes	Bacteroidales	Prevotellaceae	sf_1	5484	AY134905.1	oral periodontitis clone FX046
Bacteroidetes	Bacteroidetes	Bacteroidales	Prevotellaceae	sf_1	5720	AF481227.1	Prevotella sp. str. E9_34
Bacteroidetes	Bacteroidetes	Bacteroidales	Prevotellaceae	sf_1	5769	AB081578.1	Bacteroidaceae str. A42
Bacteroidetes	Bacteroidetes	Bacteroidales	Prevotellaceae	sf_1	5905	AF371893.1	swine intestine clone p-2443-18B5
Bacteroidetes	Bacteroidetes	Bacteroidales	Prevotellaceae	sf_1	5916	AY244931.1	cow rumen clone BE14
Bacteroidetes	Bacteroidetes	Bacteroidales	Prevotellaceae	sf_1	5926	AY244900.1	cow rumen clone BF22
Bacteroidetes	Bacteroidetes	Bacteroidales	Prevotellaceae	sf_1	5940	AF481226.1	Prevotella sp. str. E7_34
Bacteroidetes	Bacteroidetes	Bacteroidales	Prevotellaceae	sf_1	5946	AF385511.1	tongue dorsa clone DO027
Bacteroidetes	Bacteroidetes	Bacteroidales	Prevotellaceae	sf_1	6011	AB185583.1	rumen clone F24-B03
Bacteroidetes	Bacteroidetes	Bacteroidales	Prevotellaceae	sf_1	6047	AY093462.1	deep marine sediment clone MB-A2-107
Bacteroidetes	Bacteroidetes	Bacteroidales	Prevotellaceae	sf_1	6118
Bacteroidetes	Bacteroidetes	Bacteroidales	Prevotellaceae	sf_1	6152	AF001768.1	rumen clone RF37
Bacteroidetes	Bacteroidetes	Bacteroidales	Prevotellaceae	sf_1	6236
Bacteroidetes	Bacteroidetes	Bacteroidales	Prevotellaceae	sf_1	6259
Bacteroidetes	Bacteroidetes	Bacteroidales	Rikenellaceae	sf_5	5889	AB088945.1	termite gut homogenate clone Rs-F73 bacterium
Bacteroidetes	Bacteroidetes	Bacteroidales	Rikenellaceae	sf_5	5892	AJ229217.1	anoxic bulk soil flooded rice microcosm clone BSV73
Bacteroidetes	Bacteroidetes	Bacteroidales	Unclassified	sf_15	5257	AY188307.1	marine? clone KD3-67
Bacteroidetes	Bacteroidetes	Bacteroidales	Unclassified	sf_15	5353	AF529128.1	trichloroethene-contaminated site clone FTLpost3 bacterium
Bacteroidetes	Bacteroidetes	Bacteroidales	Unclassified	sf_15	5355	AJ306736.1	DCP-dechlorinating consortium clone SHA-5
Bacteroidetes	Bacteroidetes	Bacteroidales	Unclassified	sf_15	5475	AJ249101.1	SHA-25 clone
Bacteroidetes	Bacteroidetes	Bacteroidales	Unclassified	sf_15	5481	AJ535258.1	marine sediment above hydrate ridge clone Hyd89-72 bacterium
Bacteroidetes	Bacteroidetes	Bacteroidales	Unclassified	sf_15	5511	AJ535256.1	marine sediment above hydrate ridge clone Hyd-B2-1 bacterium
Bacteroidetes	Bacteroidetes	Bacteroidales	Unclassified	sf_15	5544	AY188304.1	marine? clone KD3-17
Bacteroidetes	Bacteroidetes	Bacteroidales	Unclassified	sf_15	5573	AB088930.1	termite gut homogenate clone Rs-D44 bacterium
Bacteroidetes	Bacteroidetes	Bacteroidales	Unclassified	sf_15	5783	AF507869.2	Mono Lake at depth 35 m station 6 July 2000 clone ML635J-15 bacterium
Bacteroidetes	Bacteroidetes	Bacteroidales	Unclassified	sf_15	5784	AY838556.1	fruiting body Pleurotus eryngii clone PE01
Bacteroidetes	Bacteroidetes	Bacteroidales	Unclassified	sf_15	5820	AY244902.1	cow rumen clone BF24
Bacteroidetes	Bacteroidetes	Bacteroidales	Unclassified	sf_15	5874	AJ441239.1	hydrothermal vent polychaete mucous clone P. palm A 53
Bacteroidetes	Bacteroidetes	Bacteroidales	Unclassified	sf_15	5890	AY218551.1	penguin droppings sediments clone KD1-125
Bacteroidetes	Bacteroidetes	Bacteroidales	Unclassified	sf_15	5957	AJ441217.1	hydrothermal vent polychaete mucous clone P. palm C/A 20
Bacteroidetes	Bacteroidetes	Bacteroidales	Unclassified	sf_15	6046	AJ488097.1	chlorobenzene-degrading consortium clone IIIB-1
Bacteroidetes	Bacteroidetes	Bacteroidales	Unclassified	sf_15	6069	AJ289174.1	corneal ulcer clone E1-K9
Bacteroidetes	Bacteroidetes	Bacteroidales	Unclassified	sf_15	6233	AY134906.1	oral periodontitis clone FX069
Bacteroidetes	Bacteroidetes	Bacteroidales	Unclassified	sf_15	6324	AY216445.1	temperate estuarine mud clone KM02
Bacteroidetes	Flavobacteria	Flavobacteriales	Blattabacteriaceae	sf_1	5828	Z35664.1	Blattabacterium species
Bacteroidetes	Flavobacteria	Flavobacteriales	Cryomorphaceae	sf_1	5400	AB078042.1	Crocinitomix catalasitica str. IFO 15977
Bacteroidetes	Flavobacteria	Flavobacteriales	Flavobacteriaceae	sf_1	5267	AF406541.1	bacterioplankton clone AEGEAN_179
Bacteroidetes	Flavobacteria	Flavobacteriales	Flavobacteriaceae	sf_1	5317	AB078057.1	Tenacibaculum maritimum str. IFO 15946
Bacteroidetes	Flavobacteria	Flavobacteriales	Flavobacteriaceae	sf_1	5352	AY871820.2	Riemerella anatipestifer str. H-2565
Bacteroidetes	Flavobacteria	Flavobacteriales	Flavobacteriaceae	sf_1	5367	AY238333.1	patient's bronchoalveolar lavage isolate str. MDA2507 sp.
Bacteroidetes	Flavobacteria	Flavobacteriales	Flavobacteriaceae	sf_1	5423	AF170754.1	Aequorivita antarctica str. QSSC9-14
Bacteroidetes	Flavobacteria	Flavobacteriales	Flavobacteriaceae	sf_1	5436	AF468406.1	Arctic sea ice ARK10004
Bacteroidetes	Flavobacteria	Flavobacteriales	Flavobacteriaceae	sf_1	5462	AF433174.1	Flavobacterium omnivorum str. AS 1.2747; JCM 11313
Bacteroidetes	Flavobacteria	Flavobacteriales	Flavobacteriaceae	sf_1	5473
Bacteroidetes	Flavobacteria	Flavobacteriales	Flavobacteriaceae	sf_1	5479	AJ440988.1	Flavobacterium frigoris str. LMG 21471
Bacteroidetes	Flavobacteria	Flavobacteriales	Flavobacteriaceae	sf_1	5482
Bacteroidetes	Flavobacteria	Flavobacteriales	Flavobacteriaceae	sf_1	5589
Bacteroidetes	Flavobacteria	Flavobacteriales	Flavobacteriaceae	sf_1	5671
Bacteroidetes	Flavobacteria	Flavobacteriales	Flavobacteriaceae	sf_1	5730
Bacteroidetes	Flavobacteria	Flavobacteriales	Flavobacteriaceae	sf_1	5843	AY871828.2	Riemerella anatipestifer str. 8755
Bacteroidetes	Flavobacteria	Flavobacteriales	Flavobacteriaceae	sf_1	5901	AF468423.1	Arctic sea ice ARK10159
Bacteroidetes	Flavobacteria	Flavobacteriales	Flavobacteriaceae	sf_1	5915	AJ534682.1	ground water deep-well injection disposal site radioactive wastes Tomsk-7 clone S15A-MN27 bacterium
Bacteroidetes	Flavobacteria	Flavobacteriales	Flavobacteriaceae	sf_1	5942
Bacteroidetes	Flavobacteria	Flavobacteriales	Flavobacteriaceae	sf_1	5954	L39067.1	Flavobacterium hibernum str. ATCC51468
Bacteroidetes	Flavobacteria	Flavobacteriales	Flavobacteriaceae	sf_1	5955	AJ244701.1	Flavobacterium sp. str. V4.MS.29 = MM_2747
Bacteroidetes	Flavobacteria	Flavobacteriales	Flavobacteriaceae	sf_1	5958	AJ244698.1	Flavobacterium sp. str. V4.BS.09 = MM_2428
Bacteroidetes	Flavobacteria	Flavobacteriales	Flavobacteriaceae	sf_1	5969	U41350.1	Capnocytophaga ochracea str. ATCC 27872 T
Bacteroidetes	Flavobacteria	Flavobacteriales	Flavobacteriaceae	sf_1	5971	M62799.1	Cytophaga uliginosa
Bacteroidetes	Flavobacteria	Flavobacteriales	Flavobacteriaceae	sf_1	5981
Bacteroidetes	Flavobacteria	Flavobacteriales	Flavobacteriaceae	sf_1	5991	AB032506.1	Tenacibaculum ovolyticum str. IAM14318
Bacteroidetes	Flavobacteria	Flavobacteriales	Flavobacteriaceae	sf_1	5997	M62797.1	Flavobacterium aquatile
Bacteroidetes	Flavobacteria	Flavobacteriales	Flavobacteriaceae	sf_1	6090	AB074613.1	synonym: CFB group clone APe2_9
Bacteroidetes	Flavobacteria	Flavobacteriales	Flavobacteriaceae	sf_1	6104
Bacteroidetes	Flavobacteria	Flavobacteriales	Flavobacteriaceae	sf_1	6252	AF449259.1	Riftia pachyptila's tube clone R103-B20
Bacteroidetes	Flavobacteria	Flavobacteriales	Flavobacteriaceae	sf_1	6269	AY080916.1	acidic forest soil clone UC1
Bacteroidetes	Flavobacteria	Flavobacteriales	Flavobacteriaceae	sf_1	6274
Bacteroidetes	Flavobacteria	Flavobacteriales	Unclassified	sf_3	5248	AY274839.1	Delaware River estuary clone 1G12
Bacteroidetes	KSA1	Unclassified	Unclassified	sf_1	5951	AF449785.1	CFB group clone ML615J-4
Bacteroidetes	Sphingobacteria	Sphingobacteriales	Crenotrichaceae	sf_11	5334	AB117715.1	autotrophic nitrifying biofilm clone NB-11
Bacteroidetes	Sphingobacteria	Sphingobacteriales	Crenotrichaceae	sf_11	5463	AB078068.1	Flexibacter sancti str. IFO 16034
Bacteroidetes	Sphingobacteria	Sphingobacteriales	Crenotrichaceae	sf_11	5543	AF407678.1	Great Artesian Basin clone Y30
Bacteroidetes	Sphingobacteria	Sphingobacteriales	Crenotrichaceae	sf_11	5619	AY211072.1	anaerobic VC-degrading enrichment clone VC10 bacterium
Bacteroidetes	Sphingobacteria	Sphingobacteriales	Crenotrichaceae	sf_11	5888	AY218661.1	penguin droppings sediments clone KD9-169
Bacteroidetes	Sphingobacteria	Sphingobacteriales	Crenotrichaceae	sf_11	6123	AB078055.1	Flexibacter japonensis str. IFO 16041
Bacteroidetes	Sphingobacteria	Sphingobacteriales	Crenotrichaceae	sf_11	6249	M58790.2	Haliscomenobacter hydrossis
Bacteroidetes	Sphingobacteria	Sphingobacteriales	Crenotrichaceae	sf_11	6267	AF316115.1	Cilia- respiratory isolate str. 243-54
Bacteroidetes	Sphingobacteria	Sphingobacteriales	Flammeovirgaceae	sf_5	6084	AB078078.1	Microscilla arenaria str. IFO 15982
Bacteroidetes	Sphingobacteria	Sphingobacteriales	Flexibacteraceae	sf_19	5307	AB078082.1	Microscilla sericea str. IFO 16561
Bacteroidetes	Sphingobacteria	Sphingobacteriales	Flexibacteraceae	sf_19	5357	AB078065.1	Flexibacter ruber str. IFO 16677
Bacteroidetes	Sphingobacteria	Sphingobacteriales	Flexibacteraceae	sf_19	5364	AJ577142.1	Algoriphagus antarcticus str. LMG 21983
Bacteroidetes	Sphingobacteria	Sphingobacteriales	Flexibacteraceae	sf_19	5372
Bacteroidetes	Sphingobacteria	Sphingobacteriales	Flexibacteraceae	sf_19	5542	AB073595.2	Cytophaga sp. I-1787
Bacteroidetes	Sphingobacteria	Sphingobacteriales	Flexibacteraceae	sf_19	5563	AB073573.2	Cytophaga sp. I-545
Bacteroidetes	Sphingobacteria	Sphingobacteriales	Flexibacteraceae	sf_19	5566	AY264838.1	Hongiella mannitolivorans str. IMSNU 14012 JC2050
Bacteroidetes	Sphingobacteria	Sphingobacteriales	Flexibacteraceae	sf_19	5667	AY218749.1	penguin droppings sediments clone KD6-118
Bacteroidetes	Sphingobacteria	Sphingobacteriales	Flexibacteraceae	sf_19	5728	AB073564.2	Cytophaga sp. str. MBIC04693
Bacteroidetes	Sphingobacteria	Sphingobacteriales	Flexibacteraceae	sf_19	5994	AJ549285.1	Hymenobacter sp. str. NS/50
Bacteroidetes	Sphingobacteria	Sphingobacteriales	Flexibacteraceae	sf_19	6124	AB078054.1	Flexibacter flexilis subsp. pelliculosus str. IFO 16028 subsp.
Bacteroidetes	Sphingobacteria	Sphingobacteriales	Flexibacteraceae	sf_19	6261	AF468338.1	Arctic sea ice cryoconite clone ARKCRY-50
Bacteroidetes	Sphingobacteria	Sphingobacteriales	Flexibacteraceae	sf_19	6297	AF502211.1	EBPR sludge lab scale clone HP1A92
Bacteroidetes	Sphingobacteria	Sphingobacteriales	Flexibacteraceae	sf_20	10311	AJ431236.1	Cytophaga sp. str. BHI60-57B
Bacteroidetes	Sphingobacteria	Sphingobacteriales	Sphingobacteriaceae	sf_1	5459	AJ551152.1	Pedobacter sp. An13
Bacteroidetes	Sphingobacteria	Sphingobacteriales	Sphingobacteriaceae	sf_1	5492	AF492000.1	Sphingobacterium sp. str. HC-6155
Bacteroidetes	Sphingobacteria	Sphingobacteriales	Sphingobacteriaceae	sf_1	5513	AF385549.1	crevicular epithelial cells clone AZ123
Bacteroidetes	Sphingobacteria	Sphingobacteriales	Sphingobacteriaceae	sf_1	5913	AF409002.1	Sphingobacteriaceae str. Ellin160
Bacteroidetes	Sphingobacteria	Sphingobacteriales	Sphingobacteriaceae	sf_1	6158	AF538748.1	municipal wastewater treatment bioreactor isolate str. CAGY10
Bacteroidetes	Sphingobacteria	Sphingobacteriales	Sphingobacteriaceae	sf_1	6250	AB078046.1	Flexibacter canadensis str. IFO 15130
Bacteroidetes	Sphingobacteria	Sphingobacteriales	Sphingobacteriaceae	sf_1	6272	M11657.1	Sphingobacterium heparinum
Bacteroidetes	Sphingobacteria	Sphingobacteriales	Unclassified	sf_6	5439	AF507859.1	Mono Lake at depth 35 m station 6 July 2000 clone ML635J-40 bacterium
Bacteroidetes	Sphingobacteria	Sphingobacteriales	Unclassified	sf_3	6168	AF534435.1	Toolik Lake main station at 3 m depth clone TLM11/TLMdgge04
Bacteroidetes	Sphingobacteria	Sphingobacteriales	Unclassified	sf_3	6298	AF445661.1	travertine hot spring clone SM1C04
Bacteroidetes	Unclassified	Unclassified	Unclassified	sf_4	5637
Bacteroidetes	Unclassified	Unclassified	Unclassified	sf_4	5703
Bacteroidetes	Unclassified	Unclassified	Unclassified	sf_1	5745
Bacteroidetes	Unclassified	Unclassified	Unclassified	sf_4	5785	AF507862.1	Mono Lake at depth 35 m station 6 July 2000 clone ML635J-56
Bacteroidetes	Unclassified	Unclassified	Unclassified	sf_4	5787	AF507860.1	Mono Lake at depth 35 m station 6 July 2000 clone ML635J-1 bacterium
Bacteroidetes	Unclassified	Unclassified	Unclassified	sf_4	5850
BRC1	Unclassified	Unclassified	Unclassified	sf_2	118	AY218548.1	penguin droppings sediments clone KD1-1
BRC1	Unclassified	Unclassified	Unclassified	sf_1	5051	AJ390454.1	soil clone PBS-III-24
BRC1	Unclassified	Unclassified	Unclassified	sf_1	5143	AJ390438.1	soil clone PBS-II-1
Caldithrix	Unclassified	Caldithrales	Caldithraceae	sf_2	91	AF323775.1	benzoate-degrading consortium clone BA059
Caldithrix	Unclassified	Caldithrales	Caldithraceae	sf_1	2384	AF286032.1	saltmarsh clone LCP-89
Chlamydiae	Chlamydiae	Chlamydiales	Chlamydiaceae	sf_1	4820	NC_002179.2	Chlamydophila pneumoniae str. AR39
Chlamydiae	Chlamydiae	Chlamydiales	Parachlamydiaceae	sf_1	4964	AY082465.1	neutral pH mine biofilm clone 44a-B1-34
Chlamydiae	Chlamydiae	Chlamydiales	Simkaniaceae	sf_1	4702	AY223862.1	Candidatus Rhabdochlamydia porcellionis clone RKPsHep porcellionis
Chlorobi	Chlorobia	Chlorobiales	Chlorobiaceae	sf_1	262	Y18253.1	Chlorobium ferrooxidans DSM 13031 str. KofoX
Chlorobi	Chlorobia	Chlorobiales	Chlorobiaceae	sf_1	859	Y08105.1	Chlorobium phaeovibrioides str. 2631
Chlorobi	Chlorobia	Chlorobiales	Chlorobiaceae	sf_1	906
Chlorobi	Chlorobia	Chlorobiales	Chlorobiaceae	sf_1	995	AB054671.1	Chlorobium limicola str. M1
Chlorobi	Unclassified	Unclassified	Unclassified	sf_8	344	AJ504563.1	sewage sludge clone
Chlorobi	Unclassified	Unclassified	Unclassified	sf_8	549	AY118151.1	benzene-degrading nitrate-reducing consortium clone Cart-N2 bacterium
Chlorobi	Unclassified	Unclassified	Unclassified	sf_8	636	AY118152.1	benzene-degrading nitrate-reducing consortium clone Cart-N3 bacterium
Chlorobi	Unclassified	Unclassified	Unclassified	sf_6	5294	AY221073.1	Mammoth cave clone CCM9b
Chlorobi	Unclassified	Unclassified	Unclassified	sf_8	5822	AJ428454.1	Saltmarsh mud clone K-790
Chlorobi	Unclassified	Unclassified	Unclassified	sf_1	5928	AJ441242.1	hydrothermal vent polychaete mucous clone P. palm A 12
Chlorobi	Unclassified	Unclassified	Unclassified	sf_9	6146	AF234699.1	sludge clone A12b
Chloroflexi	Anaerolineae	Chloroflexi-1f	Unclassified	sf_1	27	AJ249103.1	DCP-dechlorinating consortium clone SHA-21
Chloroflexi	Anaerolineae	Unclassified	Unclassified	sf_9	72	AY221035.1	sediments collected at Charon's Cascade near Echo River October 2000 clone CCD21
Chloroflexi	Anaerolineae	Chloroflexi-1a	Unclassified	sf_1	76	AJ306749.1	DCP-dechlorinating consortium clone SHA-147
Chloroflexi	Anaerolineae	Unclassified	Unclassified	sf_9	94	AJ306740.1	DCP-dechlorinating consortium clone SHA-2
Chloroflexi	Anaerolineae	Chloroflexi-1a	Unclassified	sf_1	106	AJ306798.1	DCP-dechlorinating consortium clone SHD-231
Chloroflexi	Anaerolineae	Chloroflexi-1a	Unclassified	sf_1	159	AJ278169.1	anaerobic bioreactor clone SHD-235
Chloroflexi	Anaerolineae	Unclassified	Unclassified	sf_1	266
Chloroflexi	Anaerolineae	Unclassified	Unclassified	sf_1	374	AF507691.1	forest soil clone S041
Chloroflexi	Anaerolineae	Unclassified	Unclassified	sf_9	375	AF507690.1	forest soil clone C043
Chloroflexi	Anaerolineae	Chloroflexi-1a	Unclassified	sf_1	487	AB109437.1	thermophilic UASB granular sludge isolate str. IMO-1 bacterium
Chloroflexi	Anaerolineae	Unclassified	Unclassified	sf_9	576	AJ306746.2	DCP-dechlorinating consortium clone SHA-36
Chloroflexi	Anaerolineae	Chloroflexi-1a	Unclassified	sf_1	583	AJ278171.2	anaerobic bioreactor clone SHD-238
Chloroflexi	Anaerolineae	Chloroflexi-1a	Unclassified	sf_1	683	AF050563.1	contaminated aquifer clone WCHB1-80
Chloroflexi	Anaerolineae	Unclassified	Unclassified	sf_9	727	AF507692.1	forest soil clone S0208
Chloroflexi	Anaerolineae	Chloroflexi-1f	Unclassified	sf_1	765	AJ278167.1	anaerobic bioreactor clone SHD-71
Chloroflexi	Anaerolineae	Chloroflexi-1b	Unclassified	sf_2	789	AF445676.1	travertine hot spring clone SM1D10
Chloroflexi	Anaerolineae	Chloroflexi-1a	Unclassified	sf_1	927	AJ441227.1	hydrothermal vent polychaete mucous clone P. palm C 37
Chloroflexi	Anaerolineae	Unclassified	Unclassified	sf_9	946	AY216458.1	temperate estuarine mud clone KM87
Chloroflexi	Anaerolineae	Chloroflexi-1b	Unclassified	sf_1	1071	AJ412677.1	denitrifying reactor clone 131
Chloroflexi	Anaerolineae	Unclassified	Unclassified	sf_9	2539	AY218649.1	penguin droppings sediments clone KD4-96
Chloroflexi	Chloroflexi-4	Unclassified	Unclassified	sf_2	2344	AF507700.1	forest soil clone C083
Chloroflexi	Chloroflexi-4	Unclassified	Unclassified	sf_2	2532	AF529110.1	trichloroethene-contaminated site clone FTL276 bacterium
Chloroflexi	Dehalococcoidetes	Unclassified	Unclassified	sf_1	2339	AJ519643.1	uranium mill tailings soil sample clone Sh765B-TzT-20 bacterium
Chloroflexi	Dehalococcoidetes	Unclassified	Unclassified	sf_1	2367	AY093473.1	deep marine sediment clone MB-B2-113
Chloroflexi	Dehalococcoidetes	Unclassified	Unclassified	sf_1	2397	AY093480.1	deep marine sediment clone MB-C2-127
Chloroflexi	Dehalococcoidetes	Unclassified	Unclassified	sf_1	2438	AY093464.1	deep marine sediment clone MB-A2-110
Chloroflexi	Dehalococcoidetes	Unclassified	Unclassified	sf_1	2445	AY093458.1	deep marine sediment clone MB-A2-103
Chloroflexi	Dehalococcoidetes	Unclassified	Unclassified	sf_1	2485
Chloroflexi	Dehalococcoidetes	Unclassified	Unclassified	sf_1	2497	AF524015.1	forested wetland clone FW60
Chloroflexi	Thermomicrobia	Unclassified	Unclassified	sf_2	652	AJ536890.1	uranium mining waste pile soil sample clone JG30-KF-CM45
Chloroflexi	Thermomicrobia	Unclassified	Unclassified	sf_1	1041	AY250886.1	Antarctic cryptoendolith clone FBP471
Chloroflexi	Unclassified	Unclassified	Unclassified	sf_7	757	AJ306741.2	DCP-dechlorinating consortium clone SHA-8
Chloroflexi	Unclassified	Unclassified	Unclassified	sf_2	818
Chloroflexi	Unclassified	Unclassified	Unclassified	sf_5	1051	AY913277.1	forest soil clone DUNssu055 (-2B) (OTU#087)
Chloroflexi	Unclassified	Unclassified	Unclassified	sf_12	2523	AJ347055.1	sponge clone TK10
Chloroflexi	Unclassified	Unclassified	Unclassified	sf_1	2534	AF507693.1	forest soil clone S085
Coprothermobacteria	Unclassified	Unclassified	Unclassified	sf_1	751	AJ431258.1	Coprothermobacter sp. str. Dex80-3
Crenarchaeota	C1	C1a	Unclassified	sf_1	2587	AB019729.1	hydrothermal vent clone pIVWA11
Cyanobacteria	Cyanobacteria	Chloroplasts	Chloroplasts	sf_5	4966	AF244549.1	Adiantum pedatum
Cyanobacteria	Cyanobacteria	Chloroplasts	Chloroplasts	sf_5	4967	AF534438.1	Toolik Lake main station at 3 m depth clone TLM14
Cyanobacteria	Cyanobacteria	Chloroplasts	Chloroplasts	sf_5	4976	AF244550.1	Calypogeia muelleriana
Cyanobacteria	Cyanobacteria	Chloroplasts	Chloroplasts	sf_5	4984	U70721.1	Cape Hatteras picoplankton clone OM164
Cyanobacteria	Cyanobacteria	Chloroplasts	Chloroplasts	sf_13	5000	U67742.1	Mitrastema yamamotoi
Cyanobacteria	Cyanobacteria	Chloroplasts	Chloroplasts	sf_5	5006
Cyanobacteria	Cyanobacteria	Chloroplasts	Chloroplasts	sf_5	5039	U70723.1	Cape Hatteras picoplankton clone OM270
Cyanobacteria	Cyanobacteria	Chloroplasts	Chloroplasts	sf_5	5040	Y18934.1	Solanum nigrum
Cyanobacteria	Cyanobacteria	Chloroplasts	Chloroplasts	sf_11	5098	AF289245.1	Euglena tripteris str. UW OB
Cyanobacteria	Cyanobacteria	Chloroplasts	Chloroplasts	sf_5	5112	X52985.1	Cyanidium caldarium str. 14-1-1
Cyanobacteria	Cyanobacteria	Chloroplasts	Chloroplasts	sf_11	5123	AF289249.1	Lepocinclis fusiformis str. ACOI 1025
Cyanobacteria	Cyanobacteria	Chloroplasts	Chloroplasts	sf_5	5130	AF445714.1	travertine hot spring clone SM2B11
Cyanobacteria	Cyanobacteria	Chloroplasts	Chloroplasts	sf_5	5147	X82156.1	Emiliania huxleyi str. Plymouth Marine Laborator PML 92
Cyanobacteria	Cyanobacteria	Chloroplasts	Chloroplasts	sf_5	5182	M81884.1	Epifagus virginiana -- chloroplast
Cyanobacteria	Cyanobacteria	Chloroplasts	Chloroplasts	sf_5	5183	M37430.1	Pisum sativum -- chloroplast
Cyanobacteria	Cyanobacteria	Chloroplasts	Chloroplasts	sf_5	5192	AF244551.1	Cycas revoluta
Cyanobacteria	Cyanobacteria	Geitlerinema	Unclassified	sf_1	4999	AB039010.1	Geitlerinema sp. str. PCC 7105
Cyanobacteria	Cyanobacteria	Prochlorales	Unclassified	sf_1	5001	AJ347056.1	sponge clone TK09
Cyanobacteria	Cyanobacteria	Nostocales	Unclassified	sf_1	5004	AJ630458.1	Anabaena augstumalis 'SCHMIDKE JAHNKE/4a' str. SCMIDKE JAHNKE/4a
Cyanobacteria	Cyanobacteria	Pseudanabaena	Unclassified	sf_1	5008	AF448080.1	Synechococcus sp. str. PCC 7502
Cyanobacteria	Cyanobacteria	Plectonema	Unclassified	sf_1	5010	AF170757.1	LPP-group cyanobacterium isolate str. QSSC5cya QSSC5cya
Cyanobacteria	Cyanobacteria	Thermosynechococcus	Unclassified	sf_1	5012	AF448081.1	Synechococcus sp. str. PCC 6312
Cyanobacteria	Cyanobacteria	Nostocales	Unclassified	sf_1	5028	AF516732.1	Cylindrospermopsis raciborskii str. 05E
Cyanobacteria	Cyanobacteria	Spirulina	Unclassified	sf_1	5034	AF329394.1	Spirulina subsalsa str. FACHB351
Cyanobacteria	Cyanobacteria	Nostocales	Unclassified	sf_1	5047	AF247573.1	Anabaena circinalis str. AWQC150A
Cyanobacteria	Cyanobacteria	Oscillatoriales	Unclassified	sf_1	5049	AF420444.1	Oscillatoria spongeliae str. 520bg
Cyanobacteria	Cyanobacteria	Nostocales	Unclassified	sf_1	5057	AJ781148.1	Nodularia sphaerocarpa str. UTEX B 2093
Cyanobacteria	Cyanobacteria	Nostocales	Unclassified	sf_1	5072	AF268023.1	Nodularia spumigena str. PCC73104
Cyanobacteria	Cyanobacteria	Oscillatoriales	Unclassified	sf_1	5077	AB045906.1	Lyngbya var. hieronymusii str. CN4-3
Cyanobacteria	Cyanobacteria	Symploca	Unclassified	sf_1	5165	AB039021.1	Symploca atlantica str. PCC 8002
Cyanobacteria	Cyanobacteria	Nostocales	Unclassified	sf_1	5174	AF516731.1	Cylindrospermopsis raciborskii str. 23B
Cyanobacteria	Cyanobacteria	Nostocales	Unclassified	sf_1	5175	AF516729.1	Cylindrospermopsis raciborskii str. 24C
Cyanobacteria	Cyanobacteria	Oscillatoriales	Unclassified	sf_1	5184	AB074508.1	Arthrospira platensis str. IAM M-135
Cyanobacteria	Cyanobacteria	Oscillatoriales	Unclassified	sf_1	5189	AB039015.1	Oscillatoria sancta str. PCC 7515
Cyanobacteria	Cyanobacteria	Plectonema	Unclassified	sf_1	5190	AF091110.1	Plectonema sp. str. F3
Cyanobacteria	Cyanobacteria	Nostocales	Unclassified	sf_1	5191	AY038036.1	Cyanospira rippkae str. PCC 9501
Cyanobacteria	Cyanobacteria	Nostocales	Unclassified	sf_1	5199	AB074502.1	Anabaena variabilis str. IAM M-204
Cyanobacteria	Cyanobacteria	Plectonema	Unclassified	sf_1	5210	AY250881.1	lichen-dominated Antarctic cryptoendolithic community clone FBP403
Cyanobacteria	Cyanobacteria	Oscillatoriales	Unclassified	sf_1	5215	AJ000714.1	Lyngbya aestuarii str. PCC 7419
Cyanobacteria	Cyanobacteria	Chroococcales	Unclassified	sf_1	5219	AF448074.1	Synechococcus sp. str. UH7
Cyanobacteria	Unclassified	Unclassified	Unclassified	sf_5	270	AY328558.1	drinking water system simulator clone HOClCi9
Cyanobacteria	Unclassified	Unclassified	Unclassified	sf_5	4993	AJ133106.1	Oscillatoria sp
Cyanobacteria	Unclassified	Unclassified	Unclassified	sf_5	4998
Cyanobacteria	Unclassified	Unclassified	Unclassified	sf_5	5015	AB093489.1	Chlorogloeopsis fritschii str. PCC 6912
Cyanobacteria	Unclassified	Unclassified	Unclassified	sf_5	5027
Cyanobacteria	Unclassified	Unclassified	Unclassified	sf_5	5030	AY034793.1	Hapalosiphon welwitschii
Cyanobacteria	Unclassified	Unclassified	Unclassified	sf_9	5038	AF544207.1	Rumen isolate str. YS2
Cyanobacteria	Unclassified	Unclassified	Unclassified	sf_5	5064	AB003168.1	Oscillatoria neglecta str. M-82
Cyanobacteria	Unclassified	Unclassified	Unclassified	sf_5	5131	AB045961.1	Oscillatoria princeps str. NIVA CYA 150
Cyanobacteria	Unclassified	Unclassified	Unclassified	sf_9	5164	AB089123.1	termite gut homogenate clone Rs-H34
Cyanobacteria	Unclassified	Unclassified	Unclassified	sf_6	5186	AY222299.1	silica sinter depositing geothermal power station discharge drain clone ST01-SN2C
Cyanobacteria	Unclassified	Unclassified	Unclassified	sf_8	5206
Deferribacteres	Deferribacer	Unclassified	Unclassified	sf_1	797	AJ515881.1	Deferribacter abyssi str. DR
Deinococcus-Thermus	Unclassified	Unclassified	Unclassified	sf_1	178	AY028380.1	Thermus sp. str. C4
Deinococcus-Thermus	Unclassified	Unclassified	Unclassified	sf_1	563	AJ507298.1	Vulcanithermus mediatlanticus str. TR
Deinococcus-Thermus	Unclassified	Unclassified	Unclassified	sf_2	637	AF513964.1	hypersaline pond clone LA7-B27N
Deinococcus-Thermus	Unclassified	Unclassified	Unclassified	sf_3	920
Dictyoglomi	Dictyoglomi	Dictyoglomales	Dictyoglomaceae	sf_9	7579	AF353224.1	marine clone Arctic96B-6
DSS1	Unclassified	Unclassified	Unclassified	sf_2	38	AJ306783.1	DCP-dechlorinating consortium clone SHA-109
DSS1	Unclassified	Unclassified	Unclassified	sf_1	4405	AF323768.2	benzoate-degrading consortium clone BA143
Euryarchaeota	Thermoplasmata	Unclassified	Unclassified	sf_1	2087
Euryarchaeota	Thermoplasmata	Unclassified	Unclassified	sf_1	2303
Firmicutes	Anaerobranca	Unclassified	Unclassified	sf_1	4304	AF507889.1	Mono Lake at depth 35m station 6 July 2000 clone ML635J-34 G+C
Firmicutes	Bacilli	Lactobacillales	Aerococcaceae	sf_1	3323	Y17301.1	Trichococcus flocculiformis str. DSM 2094
Firmicutes	Bacilli	Lactobacillales	Aerococcaceae	sf_1	3326	AF255736.1	Nostocoida limicola I str. Ben206
Firmicutes	Bacilli	Lactobacillales	Aerococcaceae	sf_1	3386	AF317386.1	feedlot manure clone B87
Firmicutes	Bacilli	Lactobacillales	Aerococcaceae	sf_1	3435	AF275700.1	cf. Alkalibacterium sp. isolate str. F1
Firmicutes	Bacilli	Lactobacillales	Aerococcaceae	sf_1	3504	AB083413.1	Marinilactibacillus psychrotolerans str. O21
Firmicutes	Bacilli	Lactobacillales	Aerococcaceae	sf_1	3519	AF016390.1	Granulicatella elegans str. DSM 11693; B1333
Firmicutes	Bacilli	Lactobacillales	Aerococcaceae	sf_1	3522	M58797.1	Aerococcus viridans
Firmicutes	Bacilli	Lactobacillales	Aerococcaceae	sf_1	3528	AJ012666.1	Dolosicoccus paucivorans 2992-95
Firmicutes	Bacilli	Lactobacillales	Aerococcaceae	sf_1	3553	Y17300.1	Desemzia incerta str. DSM 20581
Firmicutes	Bacilli	Lactobacillales	Aerococcaceae	sf_1	3615	AJ278341.2	Aerococcus urinaehominis str. CCUG 42038b
Firmicutes	Bacilli	Lactobacillales	Aerococcaceae	sf_1	3736	Y14650.1	Desemzia incerta str. DSM 20581
Firmicutes	Bacilli	Lactobacillales	Aerococcaceae	sf_1	3782
Firmicutes	Bacilli	Lactobacillales	Aerococcaceae	sf_1	3833	L08623.1	Carnobacterium alterfunditum
Firmicutes	Bacilli	Lactobacillales	Aerococcaceae	sf_1	3840	X87150.1	Trichococcus pasteurii str. KoTa2
Firmicutes	Bacilli	Lactobacillales	Aerococcaceae	sf_1	3870	AB022027.1	Abiotrophia para-adiacens str. TKT1
Firmicutes	Bacilli	Bacillales	Alicyclobacillaceae	sf_1	3368	AY529492.1	geothermal site isolate str. G1
Firmicutes	Bacilli	Bacillales	Bacillaceae	sf_1	234	AJ293805.1	Bacillus vulcani str. 3S-1
Firmicutes	Bacilli	Bacillales	Bacillaceae	sf_1	283	Z26926.1	Geobacillus thermocatenulatus str. DSM 730
Firmicutes	Bacilli	Bacillales	Bacillaceae	sf_1	305	M77488.1	Bacillus thermoleovorans
Firmicutes	Bacilli	Bacillales	Bacillaceae	sf_1	385	X57309.1	Geobacillus stearothermophilus str. T10
Firmicutes	Bacilli	Bacillales	Bacillaceae	sf_1	462	Z26927.1	Geobacillus thermodenitrificans str. DSM 466
Firmicutes	Bacilli	Bacillales	Bacillaceae	sf_1	571	Z26922.1	Bacillus caldotenax str. DSM 406
Firmicutes	Bacilli	Bacillales	Bacillaceae	sf_1	829	AY191842.1	Geobacillus sp. str. YMTC1049
Firmicutes	Bacilli	Bacillales	Bacillaceae	sf_1	1050	AJ717384.1	Bacillus firmus CV93b
Firmicutes	Bacilli	Bacillales	Bacillaceae	sf_1	3266	AF526924.2	Mars Odyssey Orbiter and encapsulation facility clone T6-7 sp.
Firmicutes	Bacilli	Bacillales	Bacillaceae	sf_1	3283	AB021194.1	Bacillus niacini str. IFO15566
Firmicutes	Bacilli	Bacillales	Bacillaceae	sf_1	3328	AJ224963.1	Pseudobacillus carolinae
Firmicutes	Bacilli	Bacillales	Bacillaceae	sf_1	3345	AY548955.1	Bacillus pumilus str. S9
Firmicutes	Bacilli	Bacillales	Bacillaceae	sf_1	3370	AB020195.1	Bacillus sp. str. TGS437
Firmicutes	Bacilli	Bacillales	Bacillaceae	sf_1	3383
Firmicutes	Bacilli	Bacillales	Bacillaceae	sf_1	3385	AY167806.1	Bacillus licheniformis str. SAFN-031
Firmicutes	Bacilli	Bacillales	Bacillaceae	sf_1	3419	AY228462.1	Bacillus algicola str. KMM 3737
Firmicutes	Bacilli	Bacillales	Bacillaceae	sf_1	3424	AJ532701.1	uranium mill tailings clone Gitt-KF-76
Firmicutes	Bacilli	Bacillales	Bacillaceae	sf_1	3439	AF071856.1	Bacillus siralis str. 171544
Firmicutes	Bacilli	Bacillales	Bacillaceae	sf_1	3460	AY312404.1	Geobacillus jurassicus str. DS1
Firmicutes	Bacilli	Bacillales	Bacillaceae	sf_1	3467	AJ419629.1	Bacillus luciferensis str. LMG 18422
Firmicutes	Bacilli	Bacillales	Bacillaceae	sf_1	3482	AB116126.1	garbage compost isolate str. M32
Firmicutes	Bacilli	Bacillales	Bacillaceae	sf_1	3489	AY167818.1	Bacillus silvestris str. SAFN-010
Firmicutes	Bacilli	Bacillales	Bacillaceae	sf_1	3492	AB042061.1	Bacillus subtilis str. IAM 12118T
Firmicutes	Bacilli	Bacillales	Bacillaceae	sf_1	3509	AY043085.1	Bacillus benzoevorans
Firmicutes	Bacilli	Bacillales	Bacillaceae	sf_1	3515	AY608949.1	Geobacillus caldoxylosilyticus str. BGSC W98A1
Firmicutes	Bacilli	Bacillales	Bacillaceae	sf_1	3517	AF500007.1	Planococcus maritimus str. TF-9
Firmicutes	Bacilli	Bacillales	Bacillaceae	sf_1	3540	AB034836.1	Geobacillus thermoleovorans str. B23
Firmicutes	Bacilli	Bacillales	Bacillaceae	sf_1	3550	AF142677.4	Bacillus megaterium str. QM B1551
Firmicutes	Bacilli	Bacillales	Bacillaceae	sf_1	3579	AB020198.1	Bacillus sp. str. TGS750
Firmicutes	Bacilli	Bacillales	Bacillaceae	sf_1	3589	AF519468.1	Bacillus senegalensis str. RS8; CIP 106 669
Firmicutes	Bacilli	Bacillales	Bacillaceae	sf_1	3612	AB042060.1	Bacillus schlegelii str. ATCC 43741T
Firmicutes	Bacilli	Bacillales	Bacillaceae	sf_1	3650
Firmicutes	Bacilli	Bacillales	Bacillaceae	sf_1	3661	AB094471.1	Bacillus sp. str. 2216.25.2
Firmicutes	Bacilli	Bacillales	Bacillaceae	sf_1	3675	AY189750.1	Bacillus mojavensis str. M-1
Firmicutes	Bacilli	Bacillales	Bacillaceae	sf_1	3688	AY167821.1	Bacillus sp. str. SAFN-006
Firmicutes	Bacilli	Bacillales	Bacillaceae	sf_1	3706	AF302119.1	Bacillus sonorensis str. NRRL B-23155
Firmicutes	Bacilli	Bacillales	Bacillaceae	sf_1	3730	AF541965.1	Bacillus baekryungensis str. SW-93
Firmicutes	Bacilli	Bacillales	Bacillaceae	sf_1	3763	AY672761.1	Geobacillus stearothermophilus
Firmicutes	Bacilli	Bacillales	Bacillaceae	sf_1	3818	AF372616.1	Bacillus licheniformis str. Mo1
Firmicutes	Bacilli	Bacillales	Bacillaceae	sf_1	3827	AF547209.1	Bacillus acidogenesis str. 105-2
Firmicutes	Bacilli	Bacillales	Bacillaceae	sf_1	3831	AY030328.1	Bacillus licheniformis str. KL-068
Firmicutes	Bacilli	Bacillales	Bacillaceae	sf_1	3836	AY682096.1	Geobacillus stearothermophilus str. 46
Firmicutes	Bacilli	Bacillales	Bacillaceae	sf_1	3843	AF435435.1	Bacillus sphaericus str. 205y
Firmicutes	Bacilli	Bacillales	Bacillaceae	sf_1	3845	AF252326.1	hot synthetic compost clone pPD15
Firmicutes	Bacilli	Bacillales	Bacillaceae	sf_1	3848	AB098576.1	Bacillus sp. str. TUT1007
Firmicutes	Bacilli	Bacillales	Bacillaceae	sf_1	3894	AJ514408.1	Sporosarcina macmurdoensis str. CMS 21w
Firmicutes	Bacilli	Bacillales	Bacillaceae	sf_1	3898	AB034710.1	compost clone 4-28
Firmicutes	Bacilli	Bacillales	Bacillaceae	sf_1	3900	X68416.1	Bacillus licheniformis str. DSM 13
Firmicutes	Bacilli	Bacillales	Bacillaceae	sf_1	3909	D26185.1	Bacillus subtilis subsp. Marburg str. 168
Firmicutes	Bacilli	Bacillales	Bacillaceae	sf_1	3918	AF549498.1	Bacillus subtilis
Firmicutes	Bacilli	Bacillales	Bacillaceae	sf_1	3926	X92160.1	Lake Bogoria isolate 64B4
Firmicutes	Bacilli	Lactobacillales	Carnobacteriaceae	sf_1	3536
Firmicutes	Bacilli	Lactobacillales	Carnobacteriaceae	sf_1	3792	AF451271.1	Carnobacterium sp. str. D35
Firmicutes	Bacilli	Bacillales	Caryophanaceae	sf_1	3285	AJ491302.1	Caryophanon latum str. DSM 14151
Firmicutes	Bacilli	Lactobacillales	Enterococcaceae	sf_1	3261	AJ301836.1	Enterococcus mundtii str. LMG 10748
Firmicutes	Bacilli	Lactobacillales	Enterococcaceae	sf_1	3288	AY167946.1	Isolation and identification hyper-ammonia producing swine storage pits manure
Firmicutes	Bacilli	Lactobacillales	Enterococcaceae	sf_1	3298	AJ301839.1	Enterococcus saccharolyticus str. LMG 11427
Firmicutes	Bacilli	Lactobacillales	Enterococcaceae	sf_1	3318	AF539705.1	Enterococcus ratti str. ATCC 700914
Firmicutes	Bacilli	Lactobacillales	Enterococcaceae	sf_1	3382
Firmicutes	Bacilli	Lactobacillales	Enterococcaceae	sf_1	3392	Y17152.2	Vagococcus lutrae str. m1134/97/1; CCUG 39187
Firmicutes	Bacilli	Lactobacillales	Enterococcaceae	sf_1	3433	D88824.1	Tetragenococcus muriaticus
Firmicutes	Bacilli	Lactobacillales	Enterococcaceae	sf_1	3598	AJ301840.1	Enterococcus solitarius str. DSM 5634
Firmicutes	Bacilli	Lactobacillales	Enterococcaceae	sf_1	3680	X75752.1	Melissococcus plutonius str. NCDO 2440
Firmicutes	Bacilli	Lactobacillales	Enterococcaceae	sf_1	3713	AF061009.1	Enterococcus cecorum str. ATCC43198
Firmicutes	Bacilli	Lactobacillales	Enterococcaceae	sf_1	3881	AJ301829.1	Enterococcus dispar str. LMG 13521
Firmicutes	Bacilli	Bacillales	Halobacillaceae	sf_1	3344	AY881246.1	Halobacillus yeomjeoni str. MSS-402
Firmicutes	Bacilli	Bacillales	Halobacillaceae	sf_1	3488	AF500003.1	Halobacillus salinus str. HSL-3
Firmicutes	Bacilli	Bacillales	Halobacillaceae	sf_1	3552	AB087828.1	Paraliobacillus ryukyuensis
Firmicutes	Bacilli	Bacillales	Halobacillaceae	sf_1	3603	AY121432.1	Amphibacillus sp. str. YIM-kkny6
Firmicutes	Bacilli	Bacillales	Halobacillaceae	sf_1	3633	AY152839.1	Bacillus clausii str. GMBAE 42
Firmicutes	Bacilli	Bacillales	Halobacillaceae	sf_1	3756	AY121439.1	Salibacillus sp. str. YIM-kkny16
Firmicutes	Bacilli	Bacillales	Halobacillaceae	sf_1	3758	AY121435.1	Amphibacillus sp. str. YIM-kkny10
Firmicutes	Bacilli	Bacillales	Halobacillaceae	sf_1	3769	AY121437.1	Gracilibacillus sp. str. YIM-kkny13
Firmicutes	Bacilli	Bacillales	Halobacillaceae	sf_1	3849	X94558.1	Halobacillus litoralis str. SL-4
Firmicutes	Bacilli	Lactobacillales	Lactobacillaceae	sf_1	3278	AB205055.1	Lactobacillus buchneri str. JCM1115
Firmicutes	Bacilli	Lactobacillales	Lactobacillaceae	sf_1	3330	AB107637.1	Lactobacillus kitasatonis str. KM9212
Firmicutes	Bacilli	Lactobacillales	Lactobacillaceae	sf_1	3342	Y17362.1	Lactobacillus crispatus str. DSM 20584 T
Firmicutes	Bacilli	Lactobacillales	Lactobacillaceae	sf_1	3366	AY255802.1	Lactobacillus saerimneri str. GDA154 LMG 22087 DSM 16049 (T); CCUG 48462 (T)
Firmicutes	Bacilli	Lactobacillales	Lactobacillaceae	sf_1	3395	X76328.1	Lactobacillus reuteri str. DSM 20016 T
Firmicutes	Bacilli	Lactobacillales	Lactobacillaceae	sf_1	3418	AB001836.2	Lactobacillus subsp. aviarius
Firmicutes	Bacilli	Lactobacillales	Lactobacillaceae	sf_1	3478	AF257096.1	Lactobacillus crispatus str. ATCC33197
Firmicutes	Bacilli	Lactobacillales	Lactobacillaceae	sf_1	3490	AY675248.1	Lactobacillus suntoryeus str. LH
Firmicutes	Bacilli	Lactobacillales	Lactobacillaceae	sf_1	3521	AJ271383.1	Pediococcus inopinatus str. DSM 20285
Firmicutes	Bacilli	Lactobacillales	Lactobacillaceae	sf_1	3526	AF401673.1	Lactobacillus sakei
Firmicutes	Bacilli	Lactobacillales	Lactobacillaceae	sf_1	3547	AJ250074.1	Lactobacillus frumenti str. TMW 1.666
Firmicutes	Bacilli	Lactobacillales	Lactobacillaceae	sf_1	3566	X76329.1	Lactobacillus pontis str. LTH 2587
Firmicutes	Bacilli	Lactobacillales	Lactobacillaceae	sf_1	3587	AB063479.1	Lactobacillus fuchuensis str. JCM 11249
Firmicutes	Bacilli	Lactobacillales	Lactobacillaceae	sf_1	3600	AJ242969.1	Lactobacillus crispatus str. NCTC 4
Firmicutes	Bacilli	Lactobacillales	Lactobacillaceae	sf_1	3604
Firmicutes	Bacilli	Lactobacillales	Lactobacillaceae	sf_1	3618	AF243159.1	Lactobacillus jensenii str. KC36b
Firmicutes	Bacilli	Lactobacillales	Lactobacillaceae	sf_1	3634	AJ417738.1	Lactobacillus letivazi str. JCL3994
Firmicutes	Bacilli	Lactobacillales	Lactobacillaceae	sf_1	3669	AF000163.1	Lactobacillus manihotivorans str. YAM I; LMG 18011
Firmicutes	Bacilli	Lactobacillales	Lactobacillaceae	sf_1	3696	AY253657.1	Lactobacillus kalixensis str. Kx127A2; LMG 22115T; DSM 16043T; CCUG 48459T
Firmicutes	Bacilli	Lactobacillales	Lactobacillaceae	sf_1	3703	AY389803.1	Lactobacillus salivarius str. RA2115
Firmicutes	Bacilli	Lactobacillales	Lactobacillaceae	sf_1	3767	AJ575744.1	Lactobacillus suebicus str. CECT 5917T
Firmicutes	Bacilli	Lactobacillales	Lactobacillaceae	sf_1	3768	Y19167.1	Lactobacillus perolens str. L532
Firmicutes	Bacilli	Lactobacillales	Lactobacillaceae	sf_1	3798	AY373589.1	Lactobacillus fermentum str. MD-9
Firmicutes	Bacilli	Lactobacillales	Lactobacillaceae	sf_1	3821	M23928.1	Lactobacillus casei
Firmicutes	Bacilli	Lactobacillales	Lactobacillaceae	sf_1	3829	AJ417500.1	Lactobacillus paralimentarius str. DSM 13238
Firmicutes	Bacilli	Lactobacillales	Lactobacillaceae	sf_1	3842	Y19168.1	Lactobacillus perolens str. L534
Firmicutes	Bacilli	Lactobacillales	Lactobacillaceae	sf_1	3874	AB018212.1	Pediococcus acidilactici str. E 7
Firmicutes	Bacilli	Lactobacillales	Lactobacillaceae	sf_1	3885	M58834.1	Pediococcus pentosaceus
Firmicutes	Bacilli	Lactobacillales	Lactobacillaceae	sf_1	3887	AJ292530.2	Lactobacillus coleohominis
Firmicutes	Bacilli	Lactobacillales	Lactobacillaceae	sf_1	3914	AJ251560.1	Lactobacillus cypricasei str. LMK3
Firmicutes	Bacilli	Lactobacillales	Leuconostocaceae	sf_1	3497	AY035892.1	Weissella koreensis S-5673
Firmicutes	Bacilli	Lactobacillales	Leuconostocaceae	sf_1	3573	AF360736.1	Leuconostoc ficulneum str. FS-1
Firmicutes	Bacilli	Bacillales	Paenibacillaceae	sf_1	319	Y14579.1	Ammoniphilus oxalaticus str. RAOx-FF
Firmicutes	Bacilli	Bacillales	Paenibacillaceae	sf_1	625	Y14580.1	Ammoniphilus oxalivorans str. RAOx-FS
Firmicutes	Bacilli	Bacillales	Paenibacillaceae	sf_1	3299	AF378230.1	Brevibacillus borstelensis str. LMG 15536
Firmicutes	Bacilli	Bacillales	Paenibacillaceae	sf_1	3415	AF480937.1	Paenibacillus nematophilus str. NEM1b
Firmicutes	Bacilli	Bacillales	Paenibacillaceae	sf_1	3559	AF378696.1	Paenibacillus turicensis str. MOL722
Firmicutes	Bacilli	Bacillales	Paenibacillaceae	sf_1	3567	Y16128.1	Paenibacillus sp. str. T-168
Firmicutes	Bacilli	Bacillales	Paenibacillaceae	sf_1	3595	AY257871.1	Paenibacillus sp. str. MB 2039
Firmicutes	Bacilli	Bacillales	Paenibacillaceae	sf_1	3630
Firmicutes	Bacilli	Bacillales	Paenibacillaceae	sf_1	3641	AJ313027.1	Brevibacillus sp. MN 47.2a
Firmicutes	Bacilli	Bacillales	Paenibacillaceae	sf_1	3651	AJ011323.1	Paenibacillus borealis KK20
Firmicutes	Bacilli	Bacillales	Paenibacillaceae	sf_1	3917	AB039334.1	Brevibacillus agri str. M1-5
Firmicutes	Bacilli	Bacillales	Paenibacillaceae	sf_1	3922	AJ320490.1	Paenibacillus thiaminolyticus str. DSM 7262
Firmicutes	Bacilli	Bacillales	Sporolactobacillaceae	sf_1	3365	AF454300.1	Bacillus sp. clone ML615J-19
Firmicutes	Bacilli	Bacillales	Sporolactobacillaceae	sf_1	3747	AB043848.1	Bacillus sp. str. C-59-2
Firmicutes	Bacilli	Bacillales	Sporolactobacillaceae	sf_1	3879	X92161.1	Lake Elmenteita isolate WE4
Firmicutes	Bacilli	Bacillales	Staphylococcaceae	sf_1	3258	D83358.1	Staphylococcus auricularis str. MAFF911484 ATCC33753T
Firmicutes	Bacilli	Bacillales	Staphylococcaceae	sf_1	3284
Firmicutes	Bacilli	Bacillales	Staphylococcaceae	sf_1	3432	AY188939.1	deep-sea sediment isolate str. P_wp0225
Firmicutes	Bacilli	Bacillales	Staphylococcaceae	sf_1	3494	AB079788.1	Micrococcus luteus B-P 26
Firmicutes	Bacilli	Bacillales	Staphylococcaceae	sf_1	3524	L14326.1	Gemella haemolysans
Firmicutes	Bacilli	Bacillales	Staphylococcaceae	sf_1	3545
Firmicutes	Bacilli	Bacillales	Staphylococcaceae	sf_1	3569	L37596.1	Staphylococcus saprophyticus
Firmicutes	Bacilli	Bacillales	Staphylococcaceae	sf_1	3592	Y12593.1	Staphylococcus caprae str. DSM 20608
Firmicutes	Bacilli	Bacillales	Staphylococcaceae	sf_1	3605
Firmicutes	Bacilli	Bacillales	Staphylococcaceae	sf_1	3628	X66100.1	Staphylococcus haemolyticus str. CCM2737
Firmicutes	Bacilli	Bacillales	Staphylococcaceae	sf_1	3638	X86641.1	Staphylococcus sp str. AG-30
Firmicutes	Bacilli	Bacillales	Staphylococcaceae	sf_1	3654	AF322002.1	Staphylococcus pettenkoferi str. B3117
Firmicutes	Bacilli	Bacillales	Staphylococcaceae	sf_1	3684	S83569.1	Staphylococcus sciuri
Firmicutes	Bacilli	Bacillales	Staphylococcaceae	sf_1	3794
Firmicutes	Bacilli	Bacillales	Staphylococcaceae	sf_1	3822	AJ320272.1	Staphylococcus succinus str. SB72
Firmicutes	Bacilli	Bacillales	Staphylococcaceae	sf_1	3865	AY119687.1	Macrococcus lamae str. CCM 4815
Firmicutes	Bacilli	Lactobacillales	Streptococcaceae	sf_1	3250	AF396920.1	Streptococcus bovis str. B315
Firmicutes	Bacilli	Lactobacillales	Streptococcaceae	sf_1	3251	AY188347.1	Streptococcus cristatus str. ATCC 51100
Firmicutes	Bacilli	Lactobacillales	Streptococcaceae	sf_1	3253	AF349918.1	derived cheese sample clone 32CR
Firmicutes	Bacilli	Lactobacillales	Streptococcaceae	sf_1	3287	AF432137.1	tongue dorsum scrapings clone FP015
Firmicutes	Bacilli	Lactobacillales	Streptococcaceae	sf_1	3290	AY518677.1	Streptococcus mitis str. Sm91
Firmicutes	Bacilli	Lactobacillales	Streptococcaceae	sf_1	3313	AY188352.1	Streptococcus salivarius str. ATCC 7073
Firmicutes	Bacilli	Lactobacillales	Streptococcaceae	sf_1	3397	Z94012.1	Streptococcus macedonicus str. ACA-DC 206 LAB617
Firmicutes	Bacilli	Lactobacillales	Streptococcaceae	sf_1	3422	X68418.1	Streptococcus thermophilus str. DSM 20617
Firmicutes	Bacilli	Lactobacillales	Streptococcaceae	sf_1	3446	AY173079.1	Streptococcus bovis str. HJ50
Firmicutes	Bacilli	Lactobacillales	Streptococcaceae	sf_1	3499	AF104676.1	Streptococcus constellatus str. ATCC27823
Firmicutes	Bacilli	Lactobacillales	Streptococcaceae	sf_1	3543
Firmicutes	Bacilli	Lactobacillales	Streptococcaceae	sf_1	3560	AJ307888.1	Streptococcus gallinaceus str. CCUG 42692
Firmicutes	Bacilli	Lactobacillales	Streptococcaceae	sf_1	3588	AY188350.1	Streptococcus downei str. ATCC 33748
Firmicutes	Bacilli	Lactobacillales	Streptococcaceae	sf_1	3629	AF139600.1	Streptococcus mutans str. UA96
Firmicutes	Bacilli	Lactobacillales	Streptococcaceae	sf_1	3685	AF003931.1	Streptococcus gordonii str. ATCC 10558
Firmicutes	Bacilli	Lactobacillales	Streptococcaceae	sf_1	3699	AE014207.1	Streptococcus agalactiae str. 2603V/R
Firmicutes	Bacilli	Lactobacillales	Streptococcaceae	sf_1	3722	NC_002662.1	Lactococcus Il1403 subsp. lactis str. IL1403
Firmicutes	Bacilli	Lactobacillales	Streptococcaceae	sf_1	3753	AF009482.1	Streptococcus suis str. 8074
Firmicutes	Bacilli	Lactobacillales	Streptococcaceae	sf_1	3869	AB104843.1	Streptococcus equi subsp. zooepidemicus str. Tokyo1291 subsp.
Firmicutes	Bacilli	Lactobacillales	Streptococcaceae	sf_1	3906	AF104114.1	Streptococcus bovis str.ATCC 43143
Firmicutes	Bacilli	Lactobacillales	Streptococcaceae	sf_1	3907	U87830.1	aortic heart valve patient with endocarditis clone v6
Firmicutes	Bacilli	Bacillales	Thermoactinomycetaceae	sf_1	3301	AB088361.1	Thermoactinomyces sp. str. 700375
Firmicutes	Bacilli	Bacillales	Thermoactinomycetaceae	sf_1	3539	AF138738.1	Laceyella sacchari str. KCTC 9789 ()
Firmicutes	Bacilli	Lactobacillales	Unclassified	sf_1	3289	AJ302648.1	Isobaculum melis CCUG 37660T
Firmicutes	Bacilli	Lactobacillales	Unclassified	sf_1	3481
Firmicutes	Bacilli	Bacillales	Unclassified	sf_3	3743
Firmicutes	Catabacter	Unclassified	Unclassified	sf_4	2716	AB089010.1	termite gut homogenate clone Rs-F76 bacterium
Firmicutes	Catabacter	Unclassified	Unclassified	sf_4	3023	AY197417.1	Guaymas Basin hydrothermal vent sediments clone B04R016
Firmicutes	Catabacter	Unclassified	Unclassified	sf_1	4261	AB089006.1	termite gut homogenate clone Rs-G04 bacterium
Firmicutes	Catabacter	Unclassified	Unclassified	sf_1	4293	AB089008.1	termite gut homogenate clone Rs-Q01 bacterium
Firmicutes	Catabacter	Unclassified	Unclassified	sf_4	4325	AB088963.1	termite gut homogenate clone Rs-K21 bacterium
Firmicutes	Catabacter	Unclassified	Unclassified	sf_4	4503	AB088976.1	termite gut homogenate clone Rs-H83 bacterium
Firmicutes	Catabacter	Unclassified	Unclassified	sf_4	4526	AY133082.1	TCE-contaminated site clone ccslm210
Firmicutes	Clostridia	Clostridiales	Clostridiaceae	sf_12	132	AB089019.1	termite gut homogenate clone Rs-J36 bacterium
Firmicutes	Clostridia	Clostridiales	Clostridiaceae	sf_12	206	AB089017.1	termite gut homogenate clone Rs-P50 bacterium
Firmicutes	Clostridia	Clostridiales	Clostridiaceae	sf_12	252	AB089014.1	termite gut homogenate clone Rs-A28 bacterium
Firmicutes	Clostridia	Clostridiales	Clostridiaceae	sf_12	2736	AY137848.1	Alkaliphilus metalliredigenes str. QYMF
Firmicutes	Clostridia	Clostridiales	Clostridiaceae	sf_12	2757	AJ308396.2	mouse feces clone C13-5
Firmicutes	Clostridia	Clostridiales	Clostridiaceae	sf_12	2764
Firmicutes	Clostridia	Clostridiales	Clostridiaceae	sf_12	2778	X73450.1	Clostridium difficile str. DSM 11209
Firmicutes	Clostridia	Clostridiales	Clostridiaceae	sf_12	2782	AJ408996.1	human colonic clone HuCB21
Firmicutes	Clostridia	Clostridiales	Clostridiaceae	sf_12	2786	AY007244.1	Clostridium glycolicum str. CIN5
Firmicutes	Clostridia	Clostridiales	Clostridiaceae	sf_12	2790	AF224675.1	Clostridium sp. str. FL4
Firmicutes	Clostridia	Clostridiales	Clostridiaceae	sf_12	2794	AJ320233.1	Caminicella sporogenes str. AM1114
Firmicutes	Clostridia	Clostridiales	Clostridiaceae	sf_12	2816	AY217423.1	TCE-dechlorinating microbial community clone 4C
Firmicutes	Clostridia	Clostridiales	Clostridiaceae	sf_12	2898	AJ132842.1	Dorea longicatena str. III-35
Firmicutes	Clostridia	Clostridiales	Clostridiaceae	sf_12	2915	AY158079.1	Tepidibacter thalassicus str. SC 562
Firmicutes	Clostridia	Clostridiales	Clostridiaceae	sf_12	3003	AJ431244.1	Clostridium sp. str. Dex60-75
Firmicutes	Clostridia	Clostridiales	Clostridiaceae	sf_12	3012	AY438672.1	Clostridium bartlettii str. WAL 16138
Firmicutes	Clostridia	Clostridiales	Clostridiaceae	sf_12	3019	AY245527.1	Tepidibacter formicigenes str. DV1184
Firmicutes	Clostridia	Clostridiales	Clostridiaceae	sf_12	3021	AF458779.1	Clostridium caminithermale str. DVird3
Firmicutes	Clostridia	Clostridiales	Clostridiaceae	sf_12	3049	Z69929.1	Clostridium paradoxum str. DSM 7308T
Firmicutes	Clostridia	Clostridiales	Clostridiaceae	sf_12	3077	X76750.1	Clostridium glycolicum str. DSM 1288
Firmicutes	Clostridia	Clostridiales	Clostridiaceae	sf_12	3108	Z69940.1	Clostridium paradoxum str. DSM 7308T
Firmicutes	Clostridia	Clostridiales	Clostridiaceae	sf_12	3219	AF407695.1	Great Artesian Basin clone R82
Firmicutes	Clostridia	Clostridiales	Clostridiaceae	sf_12	4154	AY187622.1	Clostridium tunisiense str. DSM 15206
Firmicutes	Clostridia	Clostridiales	Clostridiaceae	sf_12	4156	AF407388.1	MCB-contaminated groundwater-treating reactor clone RA9C1
Firmicutes	Clostridia	Clostridiales	Clostridiaceae	sf_12	4157	AB089043.1	termite gut homogenate clone Rs-A15 bacterium
Firmicutes	Clostridia	Clostridiales	Clostridiaceae	sf_12	4169
Firmicutes	Clostridia	Clostridiales	Clostridiaceae	sf_12	4172	AB018184.1	multiforme str. JCM 6484
Firmicutes	Clostridia	Clostridiales	Clostridiaceae	sf_12	4173	AB089020.1	termite gut homogenate clone Rs-D81 bacterium
Firmicutes	Clostridia	Clostridiales	Clostridiaceae	sf_12	4177	AF241842.1	Clostridium subterminale DSM 2636
Firmicutes	Clostridia	Clostridiales	Clostridiaceae	sf_12	4180	AB089028.1	termite gut homogenate clone Rs-M23 bacterium
Firmicutes	Clostridia	Clostridiales	Clostridiaceae	sf_12	4185	AJ276992.1	Clostridium uliginosum str. CK55
Firmicutes	Clostridia	Clostridiales	Clostridiaceae	sf_12	4187	AF538854.1	Clostridiales oral clone P4PB_122 P3
Firmicutes	Clostridia	Clostridiales	Clostridiaceae	sf_12	4225	AB100486.1	termite gut clone Rs-116
Firmicutes	Clostridia	Clostridiales	Clostridiaceae	sf_12	4229
Firmicutes	Clostridia	Clostridiales	Clostridiaceae	sf_12	4244	AB089011.1	termite gut homogenate clone Rs-K46 bacterium
Firmicutes	Clostridia	Clostridiales	Clostridiaceae	sf_12	4264	X73439.1	Clostridium collagenovorans str. DSM 3089
Firmicutes	Clostridia	Clostridiales	Clostridiaceae	sf_12	4265	AB088969.1	termite gut homogenate clone Rs-N70 bacterium
Firmicutes	Clostridia	Clostridiales	Clostridiaceae	sf_12	4266	AB088951.1	termite gut homogenate clone Rs-M86 bacterium
Firmicutes	Clostridia	Clostridiales	Clostridiaceae	sf_12	4267	AB100485.1	termite gut clone Rs-114
Firmicutes	Clostridia	Clostridiales	Clostridiaceae	sf_12	4272	AB088965.1	termite gut homogenate clone Rs-M34 bacterium
Firmicutes	Clostridia	Clostridiales	Clostridiaceae	sf_12	4275	M59087.1	Clostridium botulinum str. type G
Firmicutes	Clostridia	Clostridiales	Clostridiaceae	sf_12	4278	AF482434.1	granular sludge clone R1p16
Firmicutes	Clostridia	Clostridiales	Clostridiaceae	sf_12	4296	AB081585.1	Clostridiaceae str. A4d
Firmicutes	Clostridia	Clostridiales	Clostridiaceae	sf_12	4297
Firmicutes	Clostridia	Clostridiales	Clostridiaceae	sf_12	4299	AB100466.1	termite gut clone Rs-L02
Firmicutes	Clostridia	Clostridiales	Clostridiaceae	sf_12	4300	AB100493.1	termite gut clone Rs-060
Firmicutes	Clostridia	Clostridiales	Clostridiaceae	sf_12	4303	Y18187.1	Clostridium orbiscindens str. DSM 6740
Firmicutes	Clostridia	Clostridiales	Clostridiaceae	sf_12	4306	AY261814.1	UASB reactor granular sludge clone PD-UASB-4 bacterium
Firmicutes	Clostridia	Clostridiales	Clostridiaceae	sf_12	4310	AB100478.1	termite gut clone Rs-056
Firmicutes	Clostridia	Clostridiales	Clostridiaceae	sf_12	4321	AB089045.1	termite gut homogenate clone Rs-C76 bacterium
Firmicutes	Clostridia	Clostridiales	Clostridiaceae	sf_12	4326	AB040497.1	Oscillospira guilliermondii
Firmicutes	Clostridia	Clostridiales	Clostridiaceae	sf_12	4327	AB040498.1	Oscillospira guilliermondii
Firmicutes	Clostridia	Clostridiales	Clostridiaceae	sf_12	4339	U51843.1	Clostridium chauvoei str. ATCC 10092T
Firmicutes	Clostridia	Clostridiales	Clostridiaceae	sf_12	4341	AB041865.1	Clostridium novyi subsp. type C str. ATCC27323
Firmicutes	Clostridia	Clostridiales	Clostridiaceae	sf_12	4357	AF550610.1	Lachnospiraceae bacterium 19gly4
Firmicutes	Clostridia	Clostridiales	Clostridiaceae	sf_12	4359	AB089047.1	termite gut homogenate clone Rs-C69 bacterium
Firmicutes	Clostridia	Clostridiales	Clostridiaceae	sf_12	4364	AF481208.1	oral endodontic infection clone MCE3_9
Firmicutes	Clostridia	Clostridiales	Clostridiaceae	sf_12	4369	AB089032.1	termite gut homogenate clone Rs-N73 bacterium
Firmicutes	Clostridia	Clostridiales	Clostridiaceae	sf_12	4378
Firmicutes	Clostridia	Clostridiales	Clostridiaceae	sf_12	4406	AB088977.1	termite gut homogenate clone Rs-J39 bacterium
Firmicutes	Clostridia	Clostridiales	Clostridiaceae	sf_12	4415	AB089041.1	termite gut homogenate clone Rs-K32 bacterium
Firmicutes	Clostridia	Clostridiales	Clostridiaceae	sf_12	4418	AB088966.2	termite gut homogenate clone Rs-H18 bacterium
Firmicutes	Clostridia	Clostridiales	Clostridiaceae	sf_12	4427	L08062.1	Clostridium tyrobutyricum str. NIZO 51
Firmicutes	Clostridia	Clostridiales	Clostridiaceae	sf_12	4438	X98395.1	Clostridium sp. str. WV6
Firmicutes	Clostridia	Clostridiales	Clostridiaceae	sf_12	4459	AB100469.1	termite gut clone Rs-109
Firmicutes	Clostridia	Clostridiales	Clostridiaceae	sf_12	4461	AJ488075.1	chlorobenzene-degrading consortium clone IA-24
Firmicutes	Clostridia	Clostridiales	Clostridiaceae	sf_21	4471	AB100483.1	termite gut clone Rs-058
Firmicutes	Clostridia	Clostridiales	Clostridiaceae	sf_12	4475	AB089035.1	termite gut homogenate clone Rs-N02 bacterium
Firmicutes	Clostridia	Clostridiales	Clostridiaceae	sf_12	4477	AB089042.1	termite gut homogenate clone Rs-N85 bacterium
Firmicutes	Clostridia	Clostridiales	Clostridiaceae	sf_12	4480	AF275949.1	Clostridium neonatale str. LCDC no.99--005
Firmicutes	Clostridia	Clostridiales	Clostridiaceae	sf_12	4490
Firmicutes	Clostridia	Clostridiales	Clostridiaceae	sf_12	4497	AB089033.1	termite gut homogenate clone Rs-N16 bacterium
Firmicutes	Clostridia	Clostridiales	Clostridiaceae	sf_12	4502
Firmicutes	Clostridia	Clostridiales	Clostridiaceae	sf_12	4507	AB088984.1	termite gut homogenate clone Rs-N21 bacterium
Firmicutes	Clostridia	Clostridiales	Clostridiaceae	sf_12	4516	AF371843.1	swine intestine clone p-2194-s959-3
Firmicutes	Clostridia	Clostridiales	Clostridiaceae	sf_12	4524	AB100476.1	termite gut clone Rs-093
Firmicutes	Clostridia	Clostridiales	Clostridiaceae	sf_12	4547	X73445.1	Clostridium paraputrificum str. DSM 2630
Firmicutes	Clostridia	Clostridiales	Clostridiaceae	sf_12	4548	AB089029.1	termite gut homogenate clone Rs-Q69 bacterium
Firmicutes	Clostridia	Clostridiales	Clostridiaceae	sf_12	4550	AF371790.1	swine intestine clone p-320-a3
Firmicutes	Clostridia	Clostridiales	Clostridiaceae	sf_12	4551	X78070.1	Clostridium acetobutylicum str. ATCC 824 (T)
Firmicutes	Clostridia	Clostridiales	Clostridiaceae	sf_12	4554	AB100479.1	termite gut clone Rs-068
Firmicutes	Clostridia	Clostridiales	Clostridiaceae	sf_12	4555	M59113.1	Clostridium tyrobutyricum
Firmicutes	Clostridia	Clostridiales	Clostridiaceae	sf_12	4559	AY244908.1	cow rumen clone BF30
Firmicutes	Clostridia	Clostridiales	Clostridiaceae	sf_12	4560	X68180.1	Clostridium beijerinckii str. NCIMB9362
Firmicutes	Clostridia	Clostridiales	Clostridiaceae	sf_12	4566	AF371796.1	swine intestine clone p-2657-65A5
Firmicutes	Clostridia	Clostridiales	Clostridiaceae	sf_12	4574	NC_003030.1	Clostridium acetobutylicum str. ATCC 824
Firmicutes	Clostridia	Clostridiales	Clostridiaceae	sf_12	4575	X68451.1	Clostridium subterminale str. NCIMB 10746
Firmicutes	Clostridia	Clostridiales	Clostridiaceae	sf_12	4576	AB045286.1	Clostridium perfringens str. 13
Firmicutes	Clostridia	Clostridiales	Clostridiaceae	sf_12	4582	AF371783.1	swine intestine clone p-2600-9F5
Firmicutes	Clostridia	Clostridiales	Clostridiaceae	sf_12	4584	X71852.1	Clostridium papyrosolvens str. DSM 2782
Firmicutes	Clostridia	Clostridiales	Clostridiaceae	sf_12	4587	X68315.1	Clostridium botulinum str. 468; toxin type C
Firmicutes	Clostridia	Clostridiales	Clostridiaceae	sf_12	4588	AB185592.1	rumen clone F24-C01
Firmicutes	Clostridia	Clostridiales	Clostridiaceae	sf_12	4589	X68176.1	Clostridium butyricum str. ATCC43755
Firmicutes	Clostridia	Clostridiales	Clostridiaceae	sf_12	4590	AY542483.1	Swine manure pit isolate str. PPC78A
Firmicutes	Clostridia	Clostridiales	Clostridiaceae	sf_12	4591	AF371799.1	swine intestine clone p-953-s962-5
Firmicutes	Clostridia	Clostridiales	Clostridiaceae	sf_12	4598	AB161372.1	Clostridium sardiniense str. DSM 600
Firmicutes	Clostridia	Clostridiales	Clostridiaceae	sf_12	4600	AJ229226.1	anoxic bulk soil flooded rice microcosm clone BSV82 clone
Firmicutes	Clostridia	Clostridiales	Clostridiaceae	sf_12	4606	X68183.1	Clostridium aurantibutyricum str. NCIMB10659
Firmicutes	Clostridia	Clostridiales	Clostridiaceae	sf_12	4607	X68188.1	Clostridium novyi str. NCTC538
Firmicutes	Clostridia	Clostridiales	Clostridiaceae	sf_12	4610	AF127024.1	Clostridium putrefaciens str. DSM 1291
Firmicutes	Clostridia	Clostridiales	Clostridiaceae	sf_12	4614	AB093546.1	Clostridium sp. str. JC3
Firmicutes	Clostridia	Clostridiales	Clostridiaceae	sf_12	4622	AB100475.1	termite gut clone Rs-L36
Firmicutes	Clostridia	Clostridiales	Clostridiaceae	sf_12	4627	AB089030.1	termite gut homogenate clone Rs-A13 bacterium
Firmicutes	Clostridia	Clostridiales	Clostridiaceae	sf_12	4632
Firmicutes	Clostridia	Clostridiales	Clostridiaceae	sf_12	4635	Y18174.1	Clostridium tertium str. DSM 2485
Firmicutes	Clostridia	Clostridiales	Clostridiaceae	sf_12	4637	AB100473.1	termite gut clone Rs-088
Firmicutes	Clostridia	Clostridiales	Clostridiaceae	sf_12	4638
Firmicutes	Clostridia	Clostridiales	Clostridiaceae	sf_12	4641	AF167711.1	Papillibacter cinnamivorans str. CIN1; DSM12816
Firmicutes	Clostridia	Clostridiales	Clostridiaceae	sf_12	10457	AJ431218.1	strain isolate str. Dex60-82
Firmicutes	Clostridia	Clostridiales	Eubacteriaceae	sf_1	28	AB088988.1	termite gut homogenate clone Rs-H81 bacterium
Firmicutes	Clostridia	Clostridiales	Eubacteriaceae	sf_1	687	X96955.1	Acetobacterium wieringae str. DSM 1911
Firmicutes	Clostridia	Clostridiales	Eubacteriaceae	sf_1	1066	AF064241.1	Butyribacterium methylotrophicum
Firmicutes	Clostridia	Clostridiales	Lachnospiraceae	sf_5	2662	AF371938.1	swine intestine clone p-5278-2Wa3
Firmicutes	Clostridia	Clostridiales	Lachnospiraceae	sf_5	2668	AB088998.1	termite gut homogenate clone Rs-G40 bacterium
Firmicutes	Clostridia	Clostridiales	Lachnospiraceae	sf_5	2676	AF028351.1	Clostridium indolis CM971
Firmicutes	Clostridia	Clostridiales	Lachnospiraceae	sf_5	2681	AB088974.1	termite gut homogenate clone Rs-K41 bacterium
Firmicutes	Clostridia	Clostridiales	Lachnospiraceae	sf_5	2693	AB008552.1	ruminantium str. GA195
Firmicutes	Clostridia	Clostridiales	Lachnospiraceae	sf_5	2698	AB088950.1	termite gut homogenate clone Rs-B88 bacterium
Firmicutes	Clostridia	Clostridiales	Lachnospiraceae	sf_5	2706	X73443.1	Clostridium nexile str. DSM 1787
Firmicutes	Clostridia	Clostridiales	Lachnospiraceae	sf_5	2708	AF275914.2	anaerobic digester clone AA02
Firmicutes	Clostridia	Clostridiales	Lachnospiraceae	sf_5	2709	AY916314.1	human stool clone B065
Firmicutes	Clostridia	Clostridiales	Lachnospiraceae	sf_5	2726	AF371597.1	swine intestine clone p-1561-b5
Firmicutes	Clostridia	Clostridiales	Lachnospiraceae	sf_5	2731
Firmicutes	Clostridia	Clostridiales	Lachnospiraceae	sf_5	2733	AF349421.1	pig feces clone
Firmicutes	Clostridia	Clostridiales	Lachnospiraceae	sf_5	2735	AF371637.1	swine intestine clone p-1529-b5
Firmicutes	Clostridia	Clostridiales	Lachnospiraceae	sf_5	2737	AF001754.1	rumen clone RF22
Firmicutes	Clostridia	Clostridiales	Lachnospiraceae	sf_5	2747	AF371559.1	swine intestine clone p-3075-SwA5
Firmicutes	Clostridia	Clostridiales	Lachnospiraceae	sf_5	2748
Firmicutes	Clostridia	Clostridiales	Lachnospiraceae	sf_5	2753	AY169422.1	Clostridium clostridioforme
Firmicutes	Clostridia	Clostridiales	Lachnospiraceae	sf_5	2756	AY804149.1	Roseburia faecalis str. M6/1
Firmicutes	Clostridia	Clostridiales	Lachnospiraceae	sf_5	2771	AJ270487.2	Anaerostipes caccae str. L1-92
Firmicutes	Clostridia	Clostridiales	Lachnospiraceae	sf_5	2777	AJ270474.2	faeces isolate str. L1-83
Firmicutes	Clostridia	Clostridiales	Lachnospiraceae	sf_5	2784	AJ408993.1	human colonic clone HuCB12
Firmicutes	Clostridia	Clostridiales	Lachnospiraceae	sf_5	2793	AF357572.1	mpn-isolate group 24
Firmicutes	Clostridia	Clostridiales	Lachnospiraceae	sf_5	2801	AY169412.1	Butyrivibrio fibrisolvens
Firmicutes	Clostridia	Clostridiales	Lachnospiraceae	sf_5	2804	AY353957.1	Clostridium amygdalinum str. BR-10
Firmicutes	Clostridia	Clostridiales	Lachnospiraceae	sf_5	2808	AJ508452.1	Clostridium bolteae str. 16351
Firmicutes	Clostridia	Clostridiales	Lachnospiraceae	sf_5	2809
Firmicutes	Clostridia	Clostridiales	Lachnospiraceae	sf_5	2819
Firmicutes	Clostridia	Clostridiales	Lachnospiraceae	sf_5	2825	AF105403.1	Butyrivibrio fibrisolvens str. LP1265
Firmicutes	Clostridia	Clostridiales	Lachnospiraceae	sf_5	2830	AF132278.1	adult human fecal matter clone adhufec68
Firmicutes	Clostridia	Clostridiales	Lachnospiraceae	sf_5	2834	U41168.1	Butyrivibrio fibrisolvens str. OB156
Firmicutes	Clostridia	Clostridiales	Lachnospiraceae	sf_5	2844	AF202260.1	Pseudobutyrivibrio ruminis str. pC-XS2
Firmicutes	Clostridia	Clostridiales	Lachnospiraceae	sf_5	2849	X89975.1	Butyrivibrio fibrisolvens str. NCDO 2435
Firmicutes	Clostridia	Clostridiales	Lachnospiraceae	sf_5	2872	AB050852.1	clone GA36
Firmicutes	Clostridia	Clostridiales	Lachnospiraceae	sf_5	2893	AY169411.1	Ruminococcus obeum
Firmicutes	Clostridia	Clostridiales	Lachnospiraceae	sf_5	2903	AF153853.1	faecal clone adhufec35.25
Firmicutes	Clostridia	Clostridiales	Lachnospiraceae	sf_5	2904	AF371678.1	swine intestine clone p-1573-b5
Firmicutes	Clostridia	Clostridiales	Lachnospiraceae	sf_5	2928	AF349417.1	pig feces clone
Firmicutes	Clostridia	Clostridiales	Lachnospiraceae	sf_5	2931	AB088994.1	termite gut homogenate clone Rs-G77 bacterium
Firmicutes	Clostridia	Clostridiales	Lachnospiraceae	sf_5	2937	AF371541.1	swine intestine clone p-2482-18B5
Firmicutes	Clostridia	Clostridiales	Lachnospiraceae	sf_5	2941	AF371674.1	swine intestine clone p-211-o5
Firmicutes	Clostridia	Clostridiales	Lachnospiraceae	sf_5	2943	AF527773.1	human thigh wound isolate str. MDA2477
Firmicutes	Clostridia	Clostridiales	Lachnospiraceae	sf_5	2947	AF371653.1	swine intestine clone p-339-a3
Firmicutes	Clostridia	Clostridiales	Lachnospiraceae	sf_5	2949	AJ408999.1	human colonic clone HuCB25
Firmicutes	Clostridia	Clostridiales	Lachnospiraceae	sf_5	2955
Firmicutes	Clostridia	Clostridiales	Lachnospiraceae	sf_5	2961	AB088989.1	termite gut homogenate clone Rs-F92 bacterium
Firmicutes	Clostridia	Clostridiales	Lachnospiraceae	sf_5	2965	AF481221.1	oral endodontic infection clone MCE9_173
Firmicutes	Clostridia	Clostridiales	Lachnospiraceae	sf_5	2966
Firmicutes	Clostridia	Clostridiales	Lachnospiraceae	sf_5	2991	AB034063.1	rumen clone 3C3d-8
Firmicutes	Clostridia	Clostridiales	Lachnospiraceae	sf_5	2994	AB100463.1	termite gut clone Rs-L15
Firmicutes	Clostridia	Clostridiales	Lachnospiraceae	sf_5	3001	AJ408972.1	human colonic clone HuCA20
Firmicutes	Clostridia	Clostridiales	Lachnospiraceae	sf_5	3007
Firmicutes	Clostridia	Clostridiales	Lachnospiraceae	sf_5	3017	AB088993.1	termite gut homogenate clone Rs-D48 bacterium
Firmicutes	Clostridia	Clostridiales	Lachnospiraceae	sf_5	3022	AJ229214.1	anoxic bulk soil flooded rice microcosm clone BSV70 clone
Firmicutes	Clostridia	Clostridiales	Lachnospiraceae	sf_5	3028	L76604.1	Ruminococcus torques str. ATCC 27756
Firmicutes	Clostridia	Clostridiales	Lachnospiraceae	sf_5	3036	AB088990.1	termite gut homogenate clone Rs-F27 bacterium
Firmicutes	Clostridia	Clostridiales	Lachnospiraceae	sf_5	3038	AF371648.1	swine intestine clone p-1594-c5
Firmicutes	Clostridia	Clostridiales	Lachnospiraceae	sf_5	3042	AF371584.1	swine intestine clone p-2876-6C5
Firmicutes	Clostridia	Clostridiales	Lachnospiraceae	sf_5	3045	AJ408961.1	human colonic clone HuCA5
Firmicutes	Clostridia	Clostridiales	Lachnospiraceae	sf_5	3059	X89978.1	Butyrivibrio fibrisolvens str. NCDO 2249
Firmicutes	Clostridia	Clostridiales	Lachnospiraceae	sf_5	3060	AB089002.1	termite gut homogenate clone Rs-B14 bacterium
Firmicutes	Clostridia	Clostridiales	Lachnospiraceae	sf_5	3066	AF067965.1	Clostridium methoxybenzovorans str. SR3; DSM 12182
Firmicutes	Clostridia	Clostridiales	Lachnospiraceae	sf_5	3075	AJ312385.1	Roseburia intestinalis str. L1-82
Firmicutes	Clostridia	Clostridiales	Lachnospiraceae	sf_5	3076	AY169415.1	Clostridium nexile
Firmicutes	Clostridia	Clostridiales	Lachnospiraceae	sf_5	3087	AY178635.1	Butyrivibrio hungatei str. Su6
Firmicutes	Clostridia	Clostridiales	Lachnospiraceae	sf_5	3088	X73449.1	Clostridium sphenoides str. DSM 632
Firmicutes	Clostridia	Clostridiales	Lachnospiraceae	sf_5	3089	AY169419.1	Ruminococcus obeum
Firmicutes	Clostridia	Clostridiales	Lachnospiraceae	sf_5	3102	AF371567.1	swine intestine clone p-662-a5
Firmicutes	Clostridia	Clostridiales	Lachnospiraceae	sf_5	3107	AF202259.1	oxidoreducens str. G2-2
Firmicutes	Clostridia	Clostridiales	Lachnospiraceae	sf_5	3111	AB034059.1	rumen clone 6C3d-11
Firmicutes	Clostridia	Clostridiales	Lachnospiraceae	sf_5	3114	L76595.1	Ruminococcus productus str. ATCC 27340
Firmicutes	Clostridia	Clostridiales	Lachnospiraceae	sf_5	3146	AJ408974.1	human colonic clone HuCA22
Firmicutes	Clostridia	Clostridiales	Lachnospiraceae	sf_5	3162	AB034122.1	rumen clone 2C28d-7
Firmicutes	Clostridia	Clostridiales	Lachnospiraceae	sf_5	3171	AY169414.1	Lachnospira pectinoschiza
Firmicutes	Clostridia	Clostridiales	Lachnospiraceae	sf_5	3189	L76597.1	Ruminococcus gnavus str. ATCC 29149
Firmicutes	Clostridia	Clostridiales	Lachnospiraceae	sf_5	3218	AB089000.1	termite gut homogenate clone Rs-N53
Firmicutes	Clostridia	Clostridiales	Lachnospiraceae	sf_5	4155	AB089039.1	termite gut homogenate clone Rs-K92 bacterium
Firmicutes	Clostridia	Clostridiales	Lachnospiraceae	sf_5	4164	AF376226.1	ckncm322-B3-7 clone
Firmicutes	Clostridia	Clostridiales	Lachnospiraceae	sf_5	4167	AB089038.1	termite gut homogenate clone Rs-D76 bacterium
Firmicutes	Clostridia	Clostridiales	Lachnospiraceae	sf_5	4212	AB100488.1	termite gut clone Rs-061
Firmicutes	Clostridia	Clostridiales	Lachnospiraceae	sf_5	4246	AJ305238.1	Clostridium leptum str. DSM 753T
Firmicutes	Clostridia	Clostridiales	Lachnospiraceae	sf_5	4273	AB089044.1	termite gut homogenate clone Rs-M14 bacterium
Firmicutes	Clostridia	Clostridiales	Lachnospiraceae	sf_5	4281	AF332721.1	granular sludge clone UASB_brew_B86
Firmicutes	Clostridia	Clostridiales	Lachnospiraceae	sf_5	4289	AB100487.1	termite gut clone Rs-039
Firmicutes	Clostridia	Clostridiales	Lachnospiraceae	sf_5	4315	AB089040.1	termite gut homogenate clone Rs-N94 bacterium
Firmicutes	Clostridia	Clostridiales	Lachnospiraceae	sf_5	4330	AY244949.1	cow rumen clone BE33
Firmicutes	Clostridia	Clostridiales	Lachnospiraceae	sf_5	4331	AF332720.1	granular sludge clone UASB_brew_B84
Firmicutes	Clostridia	Clostridiales	Lachnospiraceae	sf_5	4335	AB088952.1	termite gut homogenate clone Rs-N86 bacterium
Firmicutes	Clostridia	Clostridiales	Lachnospiraceae	sf_5	4381	AF376205.1	ckncm301-B3-28 clone
Firmicutes	Clostridia	Clostridiales	Lachnospiraceae	sf_5	4434	AB089036.1	termite gut homogenate clone Rs-K11 bacterium
Firmicutes	Clostridia	Clostridiales	Lachnospiraceae	sf_5	4443	AF371775.1	swine intestine clone p-3567-9F3
Firmicutes	Clostridia	Clostridiales	Lachnospiraceae	sf_5	4510	AB089034.1	termite gut homogenate clone Rs-Q53 bacterium
Firmicutes	Clostridia	Clostridiales	Lachnospiraceae	sf_5	4511	AF376218.1	ckncm314-B7-17 clone
Firmicutes	Clostridia	Clostridiales	Lachnospiraceae	sf_5	4512	AF332711.1	granular sludge clone UASB_brew_B25
Firmicutes	Clostridia	Clostridiales	Lachnospiraceae	sf_5	4514	AB088983.2	termite gut homogenate clone Rs-B34 bacterium
Firmicutes	Clostridia	Clostridiales	Lachnospiraceae	sf_5	4525	AB088991.1	termite gut homogenate clone Rs-Q18 bacterium
Firmicutes	Clostridia	Clostridiales	Lachnospiraceae	sf_5	4533	AB088980.1	termite gut homogenate clone Rs-N06 bacterium
Firmicutes	Clostridia	Clostridiales	Lachnospiraceae	sf_5	4535	AF376201.1	ckncm297-B1-1 clone
Firmicutes	Clostridia	Clostridiales	Lachnospiraceae	sf_5	4538	AJ270470.2	Faecalibacterium prausnitzii str. L2-6
Firmicutes	Clostridia	Clostridiales	Lachnospiraceae	sf_5	4539	AB089046.1	termite gut homogenate clone Rs-C61 bacterium
Firmicutes	Clostridia	Clostridiales	Lachnospiraceae	sf_5	4540	AB088968.1	termite gut homogenate clone Rs-M18 bacterium
Firmicutes	Clostridia	Clostridiales	Lachnospiraceae	sf_5	4541	AF132258.1	adult human fecal matter clone adhufec296
Firmicutes	Clostridia	Clostridiales	Lachnospiraceae	sf_5	4563	AF371726.1	swine intestine clone p-1706-b3
Firmicutes	Clostridia	Clostridiales	Lachnospiraceae	sf_5	4567	AJ408989.1	human colonic clone HuCB5
Firmicutes	Clostridia	Clostridiales	Lachnospiraceae	sf_5	4571	X85022.1	Faecalibacterium prausnitzii str. ATCC 27766
Firmicutes	Clostridia	Clostridiales	Lachnospiraceae	sf_5	4572	AF349415.1	pig feces clone
Firmicutes	Clostridia	Clostridiales	Lachnospiraceae	sf_5	4613	AB034003.1	rumen clone 3C0d-3
Firmicutes	Clostridia	Clostridiales	Lachnospiraceae	sf_5	4623	AJ408957.1	human colonic clone HuCA1
Firmicutes	Clostridia	Clostridiales	Peptococc/Acidaminococc	sf_11	39	AF523919.1	forested wetland clone RCP2-71
Firmicutes	Clostridia	Clostridiales	Peptococc/Acidaminococc	sf_11	49	AF351223.1	coal tar-contaminated groundwater clone 36-28
Firmicutes	Clostridia	Clostridiales	Peptococc/Acidaminococc	sf_11	59	AF371694.1	swine intestine clone p-1941-s962-3
Firmicutes	Clostridia	Clostridiales	Peptococc/Acidaminococc	sf_11	71	AY218598.1	penguin droppings sediments clone KD2-97
Firmicutes	Clostridia	Clostridiales	Peptococc/Acidaminococc	sf_11	126	AY134907.1	oral periodontitis clone FY011
Firmicutes	Clostridia	Clostridiales	Peptococc/Acidaminococc	sf_11	131	AF349425.1	pig feces clone
Firmicutes	Clostridia	Clostridiales	Peptococc/Acidaminococc	sf_11	150
Firmicutes	Clostridia	Clostridiales	Peptococc/Acidaminococc	sf_11	161	X72867.1	Phascolarctobacterium faecium
Firmicutes	Clostridia	Clostridiales	Peptococc/Acidaminococc	sf_11	181	AF548373.1	Allisonella histaminiformans str. MR2
Firmicutes	Clostridia	Clostridiales	Peptococc/Acidaminococc	sf_11	242	AJ493052.1	Desulfosporosinus orientis str. DSMZ 7493
Firmicutes	Clostridia	Clostridiales	Peptococc/Acidaminococc	sf_11	257	AF473835.1	Acidaminococcus sp. str. ADV 255.99
Firmicutes	Clostridia	Clostridiales	Peptococc/Acidaminococc	sf_11	275	AY185322.1	clone AKS21
Firmicutes	Clostridia	Clostridiales	Peptococc/Acidaminococc	sf_11	300	AY214183.1	benzene-contaminated groundwater clone ZZ12C8
Firmicutes	Clostridia	Clostridiales	Peptococc/Acidaminococc	sf_11	302	AF371707.1	swine intestine clone p-2464-18B5
Firmicutes	Clostridia	Clostridiales	Peptococc/Acidaminococc	sf_11	304	AB003379.1	Selenomonas ruminantium str.JCM6582
Firmicutes	Clostridia	Clostridiales	Peptococc/Acidaminococc	sf_11	392	AF481210.1	oral endodontic infection clone MCE7_134
Firmicutes	Clostridia	Clostridiales	Peptococc/Acidaminococc	sf_11	428	AJ488090.1	chlorobenzene-degrading consortium clone IIIA-1
Firmicutes	Clostridia	Clostridiales	Peptococc/Acidaminococc	sf_11	528	AY214180.1	benzene-contaminated groundwater clone ZZ12C4
Firmicutes	Clostridia	Clostridiales	Peptococc/Acidaminococc	sf_11	534	AJ488084.1	chlorobenzene-degrading consortium clone IIA-26
Firmicutes	Clostridia	Clostridiales	Peptococc/Acidaminococc	sf_11	709	AB017195.1	Selenomonas ruminantium str.S20
Firmicutes	Clostridia	Clostridiales	Peptococc/Acidaminococc	sf_11	710	AF458222.1	Centipeda periodontii str. HB-2
Firmicutes	Clostridia	Clostridiales	Peptococc/Acidaminococc	sf_11	862	AF473834.1	Megasphaera micronuciformis str. AIP 412.00; CIP 107280
Firmicutes	Clostridia	Clostridiales	Peptococc/Acidaminococc	sf_11	863	AY162469.1	Dialister invisus str. E7_25
Firmicutes	Clostridia	Clostridiales	Peptococc/Acidaminococc	sf_11	865	AF287793.1	Selenomonas sputigena str. ATCC 35185
Firmicutes	Clostridia	Clostridiales	Peptococc/Acidaminococc	sf_11	866	AF186071.1	Veillonella ratti str. ATCC17746
Firmicutes	Clostridia	Clostridiales	Peptococc/Acidaminococc	sf_11	940	X84006.1	Veillonella dispar str. DSM 20735
Firmicutes	Clostridia	Clostridiales	Peptococc/Acidaminococc	sf_11	975	AF357557.1	mpn-isolate group 9
Firmicutes	Clostridia	Clostridiales	Peptococc/Acidaminococc	sf_11	992	AJ229198.1	anoxic bulk soil flooded rice microcosm clone BSV43 clone
Firmicutes	Clostridia	Clostridiales	Peptococc/Acidaminococc	sf_11	1036	AF407698.1	Great Artesian Basin clone G07
Firmicutes	Clostridia	Clostridiales	Peptococc/Acidaminococc	sf_11	2473
Firmicutes	Clostridia	Clostridiales	Peptostreptococcaceae	sf_5	17	AF538859.1	Peptostreptococcus sp. oral clone P4PA_156 P4 oral
Firmicutes	Clostridia	Clostridiales	Peptostreptococcaceae	sf_5	58	AF481225.1	Peptostreptococcus sp. str. E3_32
Firmicutes	Clostridia	Clostridiales	Peptostreptococcaceae	sf_5	134	AF542228.1	Peptoniphilus asaccharolyticus str. CCUG 9988
Firmicutes	Clostridia	Clostridiales	Peptostreptococcaceae	sf_5	224	AB109771.1	Finegoldia magna str. ATCC 29328
Firmicutes	Clostridia	Clostridiales	Peptostreptococcaceae	sf_5	268	AF358114.2	Sporanaerobacter acetigenes str. Lup33; DSM 13106
Firmicutes	Clostridia	Clostridiales	Peptostreptococcaceae	sf_5	393	AF542229.1	Anaerococcus vaginalis str. CCUG 31349
Firmicutes	Clostridia	Clostridiales	Peptostreptococcaceae	sf_5	436	AF550609.1	Peptostreptococcaceae bacterium 19gly3
Firmicutes	Clostridia	Clostridiales	Peptostreptococcaceae	sf_5	616	AF542230.1	Peptoniphilus lacrimalis str. CCUG 31350
Firmicutes	Clostridia	Clostridiales	Peptostreptococcaceae	sf_5	619	AY217429.1	TCE-dechlorinating microbial community clone 1G
Firmicutes	Clostridia	Clostridiales	Peptostreptococcaceae	sf_5	668	AY221992.1	Sedimentibacter sp. str. BRS2
Firmicutes	Clostridia	Clostridiales	Peptostreptococcaceae	sf_5	699	AJ318205.2	Clostridium sp. 4
Firmicutes	Clostridia	Clostridiales	Peptostreptococcaceae	sf_5	837	D14147.1	Peptoniphilus indolicus str. ATCC29427 GIFU 7848
Firmicutes	Clostridia	Clostridiales	Peptostreptococcaceae	sf_5	861	AY244779.1	Peptoniphilus sp. str. 2002-2300004
Firmicutes	Clostridia	Clostridiales	Peptostreptococcaceae	sf_5	1037	AY169425.1	Finegoldia magna
Firmicutes	Clostridia	Clostridiales	Peptostreptococcaceae	sf_5	2679	AB062845.1	termite gut homogenate clone BCf9-13
Firmicutes	Clostridia	Clostridiales	Peptostreptococcaceae	sf_5	2694	AY134903.1	oral periodontitis clone FX028
Firmicutes	Clostridia	Clostridiales	Peptostreptococcaceae	sf_5	2710	AJ306755.1	DCP-dechlorinating consortium clone SHA-74
Firmicutes	Clostridia	Clostridiales	Peptostreptococcaceae	sf_5	2714	AB088954.2	termite gut homogenate clone Rs-N27 bacterium
Firmicutes	Clostridia	Clostridiales	Peptostreptococcaceae	sf_5	2721	AB088971.1	termite gut homogenate clone Rs-N71 bacterium
Firmicutes	Clostridia	Clostridiales	Peptostreptococcaceae	sf_5	2722	AB088987.2	termite gut homogenate clone Rs-E61 bacterium
Firmicutes	Clostridia	Clostridiales	Peptostreptococcaceae	sf_5	2729	AJ306754.1	DCP-dechlorinating consortium clone SHA-58
Firmicutes	Clostridia	Clostridiales	Peptostreptococcaceae	sf_5	2796	AF287764.1	human subgingival plaque clone BB142
Firmicutes	Clostridia	Clostridiales	Peptostreptococcaceae	sf_5	2797	AY167963.1	Isolation and identification hyper-ammonia producing swine storage pits manure
Firmicutes	Clostridia	Clostridiales	Peptostreptococcaceae	sf_5	2805	AY134904.1	oral periodontitis clone FX033
Firmicutes	Clostridia	Clostridiales	Peptostreptococcaceae	sf_5	2913	AB088960.2	termite gut homogenate clone Rs-N82 bacterium
Firmicutes	Clostridia	Clostridiales	Peptostreptococcaceae	sf_5	2988	AB100461.1	termite gut clone Rs-050
Firmicutes	Clostridia	Clostridiales	Peptostreptococcaceae	sf_5	2993	AF538856.1	oral clone P2PB_46 P3
Firmicutes	Clostridia	Clostridiales	Peptostreptococcaceae	sf_5	3026	X73437.1	Clostridium bifermentans str. DSM 10716
Firmicutes	Clostridia	Clostridiales	Peptostreptococcaceae	sf_5	3080	AB088986.1	termite gut homogenate clone Rs-F43 bacterium
Firmicutes	Clostridia	Clostridiales	Peptostreptococcaceae	sf_5	3112	CR933145.1	Evry municipal wastewater treatment plant clone 012C11_B_SD_P15
Firmicutes	Clostridia	Clostridiales	Peptostreptococcaceae	sf_5	3131	U65987.1	saphenum str. ATCC 49989
Firmicutes	Clostridia	Clostridiales	Peptostreptococcaceae	sf_5	3182	AB088970.1	termite gut homogenate clone Rs-Q64 bacterium
Firmicutes	Clostridia	Clostridiales	Peptostreptococcaceae	sf_5	3183
Firmicutes	Clostridia	Clostridiales	Peptostreptococcaceae	sf_5	3200	Z36273.1	infirmum str. W1471
Firmicutes	Clostridia	Clostridiales	Peptostreptococcaceae	sf_5	3220	AJ488072.1	chlorobenzene-degrading consortium clone IA-19
Firmicutes	Clostridia	Clostridiales	Syntrophomonadaceae	sf_5	2436	AB011495.1	Thermaerobacter marianensis
Firmicutes	Clostridia	Clostridiales	Syntrophomonadaceae	sf_5	2456	AF482440.1	granular sludge clone R4b14
Firmicutes	Clostridia	Clostridiales	Syntrophomonadaceae	sf_5	2483	AF529116.1	trichloroethene-contaminated site clone FTLM142 bacterium
Firmicutes	Clostridia	Clostridiales	Syntrophomonadaceae	sf_5	2543
Firmicutes	Clostridia	Clostridiales	Unclassified	sf_17	926
Firmicutes	Clostridia	Clostridiales	Unclassified	sf_17	2324
Firmicutes	Clostridia	Unclassified	Unclassified	sf_3	2373
Firmicutes	Clostridia	Unclassified	Unclassified	sf_4	2398	AY093477.1	deep marine sediment clone MB-C2-106
Firmicutes	Clostridia	Clostridiales	Unclassified	sf_17	2432
Firmicutes	Clostridia	Clostridiales	Unclassified	sf_17	2659
Firmicutes	Clostridia	Clostridiales	Unclassified	sf_17	2683
Firmicutes	Clostridia	Clostridiales	Unclassified	sf_17	2730
Firmicutes	Clostridia	Clostridiales	Unclassified	sf_17	2875
Firmicutes	Clostridia	Clostridiales	Unclassified	sf_17	2876
Firmicutes	Clostridia	Clostridiales	Unclassified	sf_17	2912
Firmicutes	Clostridia	Clostridiales	Unclassified	sf_17	3030
Firmicutes	Clostridia	Clostridiales	Unclassified	sf_17	3099
Firmicutes	Clostridia	Clostridiales	Unclassified	sf_17	3142
Firmicutes	Clostridia	Clostridiales	Unclassified	sf_17	3215
Firmicutes	Clostridia	Clostridiales	Unclassified	sf_17	3476
Firmicutes	Clostridia	Clostridiales	Unclassified	sf_17	4168
Firmicutes	Clostridia	Unclassified	Unclassified	sf_7	4216
Firmicutes	Clostridia	Unclassified	Unclassified	sf_3	4280
Firmicutes	Clostridia	Clostridiales	Unclassified	sf_17	4307
Firmicutes	Desulfotomaculum	Unclassified	Unclassified	sf_1	198	AB091323.1	Pelotomaculum sp. str. JT
Firmicutes	Desulfotomaculum	Unclassified	Unclassified	sf_1	522	AB091327.1	UASB granular sludge clone UT-1
Firmicutes	Desulfotomaculum	Unclassified	Unclassified	sf_1	2351	Y11574.1	Desulfotomaculum thermobenzoicum str. DSM 6193
Firmicutes	Desulfotomaculum	Unclassified	Unclassified	sf_1	2359	AB091324.1	UASB granular sludge clone JP
Firmicutes	Desulfotomaculum	Unclassified	Unclassified	sf_1	2409	AF423181.1	Toluene-degrading methanogenic consortium clone Eub 1 consortium
Firmicutes	Desulfotomaculum	Unclassified	Unclassified	sf_1	2443	Y11573.1	Desulfotomaculum thermoacetoxidans str. DSM 5813
Firmicutes	Desulfotomaculum	Unclassified	Unclassified	sf_1	2490	AY084078.1	Desulfotomaculum solfataricum str. V21
Firmicutes	Desulfotomaculum	Unclassified	Unclassified	sf_1	2541	AB091328.1	UASB granular sludge clone UT-2
Firmicutes	gut clone group	Unclassified	Unclassified	sf_1	4298	AY207065.1	human mouth clone P4PA_66
Firmicutes	gut clone group	Unclassified	Unclassified	sf_1	4616	AB185532.1	rumen clone F23-C12
Firmicutes	Mollicutes	Acholeplasmatales	Acholeplasmataceae	sf_1	3945	AY566302.1	Ash witches'-broom phytoplasma str. AshWB
Firmicutes	Mollicutes	Acholeplasmatales	Acholeplasmataceae	sf_1	3961	L33766.1	Clover yellow edge mycoplasma-like organism
Firmicutes	Mollicutes	Acholeplasmatales	Acholeplasmataceae	sf_1	3975	AF302841.1	Black raspberry witches'-broom phytoplasma str. BRWB witches'-broom
Firmicutes	Mollicutes	Acholeplasmatales	Acholeplasmataceae	sf_1	3976
Firmicutes	Mollicutes	Acholeplasmatales	Acholeplasmataceae	sf_1	3977	AF495882.1	Chinaberry yellows phytoplasma str. CbY1
Firmicutes	Mollicutes	Acholeplasmatales	Acholeplasmataceae	sf_1	4044
Firmicutes	Mollicutes	Acholeplasmatales	Acholeplasmataceae	sf_1	4045	AY081817.1	Chinaberry yellows phytoplasma
Firmicutes	Mollicutes	Acholeplasmatales	Acholeplasmataceae	sf_1	4046	L33735.1	Pigeon pea witches'-broom mycoplasma-like organism
Firmicutes	Mollicutes	Acholeplasmatales	Acholeplasmataceae	sf_1	4064	AJ542542.1	Malus domestica isolate str. AT1/93
Firmicutes	Mollicutes	Acholeplasmatales	Acholeplasmataceae	sf_1	4092	AY083605.1	Australia isolate str. BVGY
Firmicutes	Mollicutes	Entomoplasmatales	Entomoplasmataceae	sf_1	4074	AF371522.1	swine intestine clone p-2013-s959-5
Firmicutes	Mollicutes	Anaeroplasmatales	Erysipelotrichaceae	sf_3	144	L34616.1	Eubacterium cylindroides
Firmicutes	Mollicutes	Anaeroplasmatales	Erysipelotrichaceae	sf_3	747	L34617.2	cylindroides str. ATCC27803
Firmicutes	Mollicutes	Anaeroplasmatales	Erysipelotrichaceae	sf_3	768
Firmicutes	Mollicutes	Anaeroplasmatales	Erysipelotrichaceae	sf_3	3939	M23732.1	Clostridium innocuum
Firmicutes	Mollicutes	Anaeroplasmatales	Erysipelotrichaceae	sf_3	3943	AB030218.1	Coprobacillus cateniformis str. JCM 10603
Firmicutes	Mollicutes	Anaeroplasmatales	Erysipelotrichaceae	sf_3	3952	AB055907.1	Erysipelothrix rhusiopathiae str. Pecs 56
Firmicutes	Mollicutes	Anaeroplasmatales	Erysipelotrichaceae	sf_3	3956	X73441.1	Clostridium spiroforme str. DSM 1552
Firmicutes	Mollicutes	Anaeroplasmatales	Erysipelotrichaceae	sf_3	3965	AY133091.1	TCE-contaminated site clone ccslm238
Firmicutes	Mollicutes	Anaeroplasmatales	Erysipelotrichaceae	sf_3	3981	AY128088.1	phototrophic sludge clone PSB-M-3
Firmicutes	Mollicutes	Anaeroplasmatales	Erysipelotrichaceae	sf_3	3993	X75908.1	Clostridium spiroforme str. ATCC 29900
Firmicutes	Mollicutes	Anaeroplasmatales	Erysipelotrichaceae	sf_3	4065	AY699288.1	Clostridium ramosum M91
Firmicutes	Mollicutes	Mycoplasmatales	Mycoplasmataceae	sf_1	3929	AY191226.1	Mycoplasma gypsbengalensis str. Gb-V33
Firmicutes	Mollicutes	Mycoplasmatales	Mycoplasmataceae	sf_1	4102	AF493543.1	Mycoplasma zalophus str. 4296C
Firmicutes	Mollicutes	Unclassified	Unclassified	sf_6	149	M23730.1	Streptococcus pleomorphus
Firmicutes	Symbiobacteria	Symbiobacterales	Unclassified	sf_1	77	AF391988.1	thermal soil clone YNPFFP9
Firmicutes	Symbiobacteria	Symbiobacterales	Unclassified	sf_1	2388	AF465653.1	G+C Gram-positive clone YNPRH70A
Firmicutes	Symbiobacteria	Symbiobacterales	Unclassified	sf_3	3508	AF190460.1	Symbiobacterium toebii str. SC-1
Firmicutes	Unclassified	Unclassified	Unclassified	sf_8	141	AF407393.1	MCB-contaminated groundwater-treating reactor clone RB9C2
Firmicutes	Unclassified	Unclassified	Unclassified	sf_8	546	AF282254.1	Ferribacter thermoautotrophicus
Firmicutes	Unclassified	Unclassified	Unclassified	sf_8	2433	AF282252.1	Ferribacter thermoautotrophicus str. JW/JH-Fiji-2
Firmicutes	Unclassified	Unclassified	Unclassified	sf_8	4536	AF507891.1	Mono Lake at depth 35m station 6 July 2000 clone ML635J-14 G+C
Fusobacteria	Fusobacteria	Fusobacterales	Fusobacteriaceae	sf_1	488	NZ_AABF02000111.1	Fusobacterium nucleatum subsp. vincentii str. ATCC 49256
Gemmatimonadetes	Unclassified	Unclassified	Unclassified	sf_5	227	AJ519397.1	uranium mining waste pile clone JG37-AG-36
Gemmatimonadetes	Unclassified	Unclassified	Unclassified	sf_5	317	AY218696.1	penguin droppings sediments clone KD8-87
Gemmatimonadetes	Unclassified	Unclassified	Unclassified	sf_5	442	AF507712.1	forest soil clone S0134
Gemmatimonadetes	Unclassified	Unclassified	Unclassified	sf_5	1127	AJ519396.1	uranium mining waste pile near Johanngeorgenstadt soil clone JG37-AG-21
Gemmatimonadetes	Unclassified	Unclassified	Unclassified	sf_5	1149	AF432618.1	lodgepole pine rhizosphere soil clone C17.11WL
Gemmatimonadetes	Unclassified	Unclassified	Unclassified	sf_5	1565	AJ532728.1	uranium mining waste pile clone JG34-KF-418
Gemmatimonadetes	Unclassified	Unclassified	Unclassified	sf_5	2047	AF234148.1	soil clone #0319-7G21
Gemmatimonadetes	Unclassified	Unclassified	Unclassified	sf_6	2554	AJ347028.1	sponge symbiont clone TK19
Gemmatimonadetes	Unclassified	Unclassified	Unclassified	sf_5	9464	AF432648.1	lodgepole pine rhizosphere soil British Columbia Ministry Forests Long-Term Soil Productivity
Gemmatimonadetes	Unclassified	Unclassified	Unclassified	sf_5	10112	AF432607.1	forest soil clone NOS7.157WL
LD1PA group	Unclassified	Unclassified	Unclassified	sf_1	10118	AY114324.1	anoxic marine sediment clone LD1-PA38
Lentisphaerae	Unclassified	Unclassified	Unclassified	sf_5	9704	AJ431235.1	Cytophaga sp. str. Dex80-64
Lentisphaerae	Unclassified	Unclassified	Unclassified	sf_5	10027	AJ431234.1	Cytophaga sp. str. Dex80-43
Lentisphaerae	Unclassified	Unclassified	Unclassified	sf_5	10330	AF507900.1	Mono lake clone ML635J-58
marine group A	mgA-1	Unclassified	Unclassified	sf_1	6408	AACY01094130.1	Sargasso Sea
marine group A	mgA-1	Unclassified	Unclassified	sf_1	6454	U34043.1	marine clone SAR406
marine group A	mgA-2	Unclassified	Unclassified	sf_1	6344	AF382142.1	bacterioplankton clone ZA3648c
Natronoanaerobium	Unclassified	Unclassified	Unclassified	sf_1	769	AJ431345.1	fjord ikaite column clone un-c23
Natronoanaerobium	Unclassified	Unclassified	Unclassified	sf_1	2437	AF507879.2	Mono Lake at depth 23m station 6 July 2000 clone ML623J-19
Natronoanaerobium	Unclassified	Unclassified	Unclassified	sf_1	3570	AF454298.1	Bacillus sp. clone ML1228J-1
Natronoanaerobium	Unclassified	Unclassified	Unclassified	sf_1	3745	AF507877.1	Mono Lake at depth 35m station 6 July 2000 clone ML635J-45
Natronoanaerobium	Unclassified	Unclassified	Unclassified	sf_1	4377	AF507888.1	Mono Lake at depth 35m station 6 July 2000 clone ML635J-65 G+C
NC10	NC10-1	Unclassified	Unclassified	sf_1	452	AY177763.1	vadose clone 5G01
NC10	NC10-1	Unclassified	Unclassified	sf_1	536	AJ519669.1	uranium mill tailings clone GuBH2-AD-8
NC10	NC10-2	Unclassified	Unclassified	sf_1	10254	AJ519650.1	uranium mill tailings soil sample clone Sh765B-TzT-35
NC10	Unclassified	Unclassified	Unclassified	sf_1	2516	AF529103.1	TCE-contaminated site clone FTL22
Nitrospira	Nitrospira	Nitrospirales	Nitrospiraceae	sf_1	179	AF407702.1	Great Artesian Basin clone G19
Nitrospira	Nitrospira	Nitrospirales	Nitrospiraceae	sf_3	240	AF543501.1	acid mine drainage clone AW4
Nitrospira	Nitrospira	Nitrospirales	Nitrospiraceae	sf_2	542	AF524005.1	forested wetland clone FW19
Nitrospira	Nitrospira	Nitrospirales	Nitrospiraceae	sf_2	544	AF524004.1	forested wetland clone FW5
Nitrospira	Nitrospira	Nitrospirales	Nitrospiraceae	sf_2	655	AJ534687.1	ground water deep-well injection disposal site radioactive wastes Tomsk-7 clone S15A-MN30 bacterium
Nitrospira	Nitrospira	Nitrospirales	Nitrospiraceae	sf_2	681
Nitrospira	Nitrospira	Nitrospirales	Nitrospiraceae	sf_2	697	AF524003.1	forested wetland clone FW118
Nitrospira	Nitrospira	Nitrospirales	Nitrospiraceae	sf_3	833	AF225448.1	acid mine drainage clone BA29
Nitrospira	Nitrospira	Nitrospirales	Nitrospiraceae	sf_1	864	Y14644.1	nitrifying sludge clone GC86
Nitrospira	Nitrospira	Nitrospirales	Nitrospiraceae	sf_1	984	AJ519405.1	uranium mining waste pile clone JG37-AG-131 sp.
OD1	OP11-5	Unclassified	Unclassified	sf_1	515
OP10	CH21 cluster	Unclassified	Unclassified	sf_1	326	AY222300.1	geothermal clone ST01-SN3H
OP10	CH21 cluster	Unclassified	Unclassified	sf_1	514	AF368184.1	sludge clone SBRA136
OP10	Unclassified	Unclassified	Unclassified	sf_4	484	AF524022.1	forested wetland clone FW68
OP10	Unclassified	Unclassified	Unclassified	sf_4	728	AY214187.1	benzene-contaminated groundwater clone ZZ12AC2
OP10	Unclassified	Unclassified	Unclassified	sf_1	8413	AJ306784.1	DCP-dechlorinating consortium clone SHA-37
OP10	Unclassified	Unclassified	Unclassified	sf_5	9782	AY192275.1	Rocky Mountain alpine soil clone S1a-1H
OP3	Unclassified	Unclassified	Unclassified	sf_2	349	AJ390463.1	soil clone PBS-25
OP3	Unclassified	Unclassified	Unclassified	sf_4	628	AY050598.1	CB-contaminated groundwater clone GOUTB15
OP3	Unclassified	Unclassified	Unclassified	sf_3	1015	AY013695.1	polluted aquifer clone BVC56
OP8	Unclassified	Unclassified	Unclassified	sf_3	69	AJ306781.1	DCP-dechlorinating consortium clone SHA-124
OP8	Unclassified	Unclassified	Unclassified	sf_3	598	AF419671.1	Guaymas Basin hydrothermal sediment clone a2b010
OP9/JS1	JS1	Unclassified	Unclassified	sf_1	2380	AY197406.1	Guaymas Basin hydrothermal vent sediments clone B03R012
OP9/JS1	JS1	Unclassified	Unclassified	sf_1	2489	AY197377.1	Guaymas Basin hydrothermal vent sediments clone B01R005
OP9/JS1	JS1	Unclassified	Unclassified	sf_1	2491	AY093469.1	deep marine sediment clone MB-B2-103
OP9/JS1	OP9	Unclassified	Unclassified	sf_1	726	AF027086.1	hot spring clone OPB72
OP9/JS1	OP9	Unclassified	Unclassified	sf_1	969	AJ306782.1	DCP-dechlorinating consortium clone SHA-1
Planctomycetes	Planctomycetacia	Planctomycetales	Anammoxales	sf_2	4683	BX294785.1	anoxic basin clone CY0ARA028B09
Planctomycetes	Planctomycetacia	Planctomycetales	Anammoxales	sf_4	4694	AF418968.1	USA: Colorado Fort collins Horsetooth Reservoir clone HT2F11
Planctomycetes	Planctomycetacia	Planctomycetales	Anammoxales	sf_4	4695	AF316773.1	Crater Lake clone CL500-15
Planctomycetes	Planctomycetacia	Planctomycetales	Anammoxales	sf_4	9662	AF407728.1	Great Artesian Basin clone B83
Planctomycetes	Planctomycetacia	Planctomycetales	Pirellulae	sf_3	4670
Planctomycetes	Planctomycetacia	Planctomycetales	Pirellulae	sf_3	4677	BX294863.1	aerobic basin clone CY0ARA032A03
Planctomycetes	Planctomycetacia	Planctomycetales	Pirellulae	sf_3	4692	BX294733.1	aerobic basin clone CY0ARA026G04
Planctomycetes	Planctomycetacia	Planctomycetales	Pirellulae	sf_3	4704	BX294700.1	aerobic basin clone CY0ARA025E11
Planctomycetes	Planctomycetacia	Planctomycetales	Pirellulae	sf_3	4803	X86388.1	Pirellula sp. str. ACM 3181
Planctomycetes	Planctomycetacia	Planctomycetales	Pirellulae	sf_3	4956	AF314429.1	aerobic phosphorus-removal ecosystem clone PHOS-HE25
Planctomycetes	Planctomycetacia	Planctomycetales	Planctomycetaceae	sf_3	4652	BX294789.1	anoxic basin clone CY0ARA028C04
Planctomycetes	Planctomycetacia	Planctomycetales	Planctomycetaceae	sf_3	4855	BX294726.1	aerobic basin clone CY0ARA026D10
Planctomycetes	Planctomycetacia	Planctomycetales	Planctomycetaceae	sf_3	4948	BX294756.1	anoxic basin clone CY0ARA027D01
Planctomycetes	Planctomycetacia	WPS-1	Unclassified	sf_1	4897	AY093476.1	deep marine sediment clone MB-C2-105
Proteobacteria	Alphaproteobacteria	Acetobacterales	Acetobacteraceae	sf_1	6637	X74066.1	Acetobacter aceti str. NCIB8621 DSM3508
Proteobacteria	Alphaproteobacteria	Acetobacterales	Acetobacteraceae	sf_1	6868	AB024492.1	Gluconobacter cerinus str. IFO 3275
Proteobacteria	Alphaproteobacteria	Acetobacterales	Acetobacteraceae	sf_1	7439	AF127400.1	Gluconacetobacter-like organism SRI1941
Proteobacteria	Alphaproteobacteria	Acetobacterales	Acetobacteraceae	sf_1	7456	AY230815.1	Gluconacetobacter diazotrophicus
Proteobacteria	Alphaproteobacteria	Acetobacterales	Acetobacteraceae	sf_1	7529	AJ012698.1	Gluconacetobacter europaeus str. ZIM B028 V3
Proteobacteria	Alphaproteobacteria	Acetobacterales	Acetobacteraceae	sf_1	7600	AJ001632.1	Acetobacter pomorum str. LTH2458
Proteobacteria	Alphaproteobacteria	Rickettsiales	Anaplasmataceae	sf_3	6628	U23709.1	Wolbachia pipientis
Proteobacteria	Alphaproteobacteria	Rickettsiales	Anaplasmataceae	sf_3	6648	AF035160.1	Wolbachia sp
Proteobacteria	Alphaproteobacteria	Rickettsiales	Anaplasmataceae	sf_3	6803	AY007547.1	Wolbachia sp. Dlem16SWol
Proteobacteria	Alphaproteobacteria	Rickettsiales	Anaplasmataceae	sf_3	7481	AF179630.1	Wolbachia pipientis
Proteobacteria	Alphaproteobacteria	Azospirillales	Azospirillaceae	sf_1	6959	AF523824.1	Rhodocista pekingensis str. 3-p
Proteobacteria	Alphaproteobacteria	Azospirillales	Azospirillaceae	sf_1	7467	X92464.1	Azospirillum sp. str. ASP-1
Proteobacteria	Alphaproteobacteria	Azospirillales	Azospirillaceae	sf_1	7539	AJ401217.1	Rhodocista sp. AR2107
Proteobacteria	Alphaproteobacteria	Bradyrhizobiales	Beijerinck/Rhodoplan/Methylocyst	sf_3	7153	AJ563928.1	Methylocella tundrae str. Y1
Proteobacteria	Alphaproteobacteria	Bradyrhizobiales	Beijerinck/Rhodoplan/Methylocyst	sf_3	7401	AF359545.1	Scrippsiella trochoidea NEPCC 15
Proteobacteria	Alphaproteobacteria	Rhizobiales	Bradyrhizobiaceae	sf_1	6824
Proteobacteria	Alphaproteobacteria	Bradyrhizobiales	Bradyrhizobiaceae	sf_1	6887	AB067729.1	Bradyrhizobium str. YB2
Proteobacteria	Alphaproteobacteria	Bradyrhizobiales	Bradyrhizobiaceae	sf_1	6941	AB087719.1	Rhodopseudomonas rhenobacensis str. Klemme Rb
Proteobacteria	Alphaproteobacteria	Rhizobiales	Bradyrhizobiaceae	sf_1	7029
Proteobacteria	Alphaproteobacteria	Bradyrhizobiales	Bradyrhizobiaceae	sf_1	7044	U87765.1	Afipia genosp. 2 str. G4438
Proteobacteria	Alphaproteobacteria	Bradyrhizobiales	Bradyrhizobiaceae	sf_1	7078	M69186.1	Afipia clevelandensis
Proteobacteria	Alphaproteobacteria	Bradyrhizobiales	Bradyrhizobiaceae	sf_1	7353	AY216437.1	temperate estuarine mud clone HC65
Proteobacteria	Alphaproteobacteria	Bradyrhizobiales	Bradyrhizobiaceae	sf_1	7390	U87781.1	Afipia genosp. 10 str. G8996
Proteobacteria	Alphaproteobacteria	Bradyrhizobiales	Bradyrhizobiaceae	sf_1	7438	AY055798.1	Nitrobacter sp. str. KB212
Proteobacteria	Alphaproteobacteria	Consistiales	Caedibacteraceae	sf_5	6947	AB089084.2	termite gut homogenate clone Rs-B60 proteobacterium
Proteobacteria	Alphaproteobacteria	Consistiales	Caedibacteraceae	sf_4	7157	AF533506.1	acid mine drainage clone ASL45
Proteobacteria	Alphaproteobacteria	Caulobacterales	Caulobacteraceae	sf_1	6781	AB023784.1	Brevundimonas intermedia str. MBIC2712 ATCC15262
Proteobacteria	Alphaproteobacteria	Caulobacterales	Caulobacteraceae	sf_1	6904	AB021414.1	Brevundimonas vesicularis str. IAM 12105T
Proteobacteria	Alphaproteobacteria	Caulobacterales	Caulobacteraceae	sf_1	6909	X87274.1	Brevundimonas diminuta str. DSM 1635
Proteobacteria	Alphaproteobacteria	Caulobacterales	Caulobacteraceae	sf_1	6968	AB021415.1	Brevundimonas diminuta str. IAM 12691T
Proteobacteria	Alphaproteobacteria	Caulobacterales	Caulobacteraceae	sf_1	7359	AJ227782.1	Brevundimonas bacteroides str. CB7
Proteobacteria	Alphaproteobacteria	Caulobacterales	Caulobacteraceae	sf_1	7366	AJ227784.1	Brevundimonas subvibrioides str. CB81
Proteobacteria	Alphaproteobacteria	Caulobacterales	Caulobacteraceae	sf_1	7436	AJ227797.1	Brevundimonas sp. str. FWC40
Proteobacteria	Alphaproteobacteria	Bradyrhizobiales	Hyphomicrobiaceae	sf_1	7646	Y14304.1	Hyphomicrobium aestuarii str. DSM 1564
Proteobacteria	Alphaproteobacteria	Azospirillales	Magnetospirillaceae	sf_1	6922	AY171615.1	Dechlorospirillum sp. str. SN1
Proteobacteria	Alphaproteobacteria	Bradyrhizobiales	Methylobacteriaceae	sf_1	7004	AY169421.1	Methylobacterium fujisawaense
Proteobacteria	Alphaproteobacteria	Bradyrhizobiales	Methylobacteriaceae	sf_1	7585	U58018.1	Methylobacterium thiocyanatum str. ALL/SCN-P
Proteobacteria	Alphaproteobacteria	Rhizobiales	Phyllobacteriaceae	sf_1	6673	AF534573.1	Nitratireductor aquibiodomus str. NL21
Proteobacteria	Alphaproteobacteria	Rhizobiales	Phyllobacteriaceae	sf_1	6692	AY786080.1	Phyllobacterium trifolii str. PETP02
Proteobacteria	Alphaproteobacteria	Rhizobiales	Phyllobacteriaceae	sf_1	6857	AY195844.1	Mesorhizobium mediterraneum str. PECA20
Proteobacteria	Alphaproteobacteria	Rhizobiales	Phyllobacteriaceae	sf_1	6916	AJ441009.1	lake microbial mat isolate str. R-9219
Proteobacteria	Alphaproteobacteria	Rhizobiales	Phyllobacteriaceae	sf_1	7009
Proteobacteria	Alphaproteobacteria	Rhizobiales	Phyllobacteriaceae	sf_1	7216	D88524.1	Ahrensia kielensis str. IAM12618
Proteobacteria	Alphaproteobacteria	Rhizobiales	Phyllobacteriaceae	sf_1	7300	AY007683.1	marine isolate JP57
Proteobacteria	Alphaproteobacteria	Rhizobiales	Phyllobacteriaceae	sf_1	7381	AJ011759.1	Aminobacter aminovorans str. DSM7048T
Proteobacteria	Alphaproteobacteria	Rhizobiales	Phyllobacteriaceae	sf_1	7497	AJ294416.1	Pseudaminobacter salicylatoxidans str. KTC001
Proteobacteria	Alphaproteobacteria	Rhizobiales	Rhizobiaceae	sf_1	6683	D14516.1	Sinorhizobium fredii str. ATCC35423
Proteobacteria	Alphaproteobacteria	Rhizobiales	Rhizobiaceae	sf_1	6725	AL591782.1	Sinorhizobium meliloti str. 1021
Proteobacteria	Alphaproteobacteria	Rhizobiales	Rhizobiaceae	sf_1	6798	AF508099.1	Agrobacterium tumefaciens TG14
Proteobacteria	Alphaproteobacteria	Rhizobiales	Rhizobiaceae	sf_1	6964	AE008265.2	Agrobacterium tumefaciens str. C58 Cereon
Proteobacteria	Alphaproteobacteria	Rhizobiales	Rhizobiaceae	sf_1	6972	AY040360.1	Ensifer adhaerens str. LMG 20582
Proteobacteria	Alphaproteobacteria	Rhizobiales	Rhizobiaceae	sf_1	6974	AF441730.1	India: Himalayas Kaza Spiti Valley Cold Desert isolate str. Kaza-35 Kaza-35
Proteobacteria	Alphaproteobacteria	Rhizobiales	Rhizobiaceae	sf_1	7051	D12786.1	Mycoplana dimorpha str. IAM 13154
Proteobacteria	Alphaproteobacteria	Rhizobiales	Rhizobiaceae	sf_1	7070
Proteobacteria	Alphaproteobacteria	Rhizobiales	Rhizobiaceae	sf_1	7457
Proteobacteria	Alphaproteobacteria	Rhizobiales	Rhizobiaceae	sf_1	7478
Proteobacteria	Alphaproteobacteria	Rhodobacterales	Rhodobacteraceae	sf_1	312	D88522.1	Pseudorhodobacter ferrugineus str. IAM12616
Proteobacteria	Alphaproteobacteria	Rhodobacterales	Rhodobacteraceae	sf_1	6652	AF353235.1	marine clone Arctic96A-1
Proteobacteria	Alphaproteobacteria	Rhodobacterales	Rhodobacteraceae	sf_1	6661	AJ534207.1	Methylarcula sp. BIO-24
Proteobacteria	Alphaproteobacteria	Rhodobacterales	Rhodobacteraceae	sf_1	6679	AF468375.1	Arctic sea ice ARK10226
Proteobacteria	Alphaproteobacteria	Rhodobacterales	Rhodobacteraceae	sf_1	6701	AF245632.1	Roseobacter clone NAC11-3
Proteobacteria	Alphaproteobacteria	Rhodobacterales	Rhodobacteraceae	sf_1	6728
Proteobacteria	Alphaproteobacteria	Rhodobacterales	Rhodobacteraceae	sf_1	6827	AF468352.1	Arctic sea ice ARK10013
Proteobacteria	Alphaproteobacteria	Rhodobacterales	Rhodobacteraceae	sf_1	6888	AF254109.1	hydrothermal vent strain str. TB66
Proteobacteria	Alphaproteobacteria	Rhodobacterales	Rhodobacteraceae	sf_1	6923	AJ534221.1	Jannaschia sp. DFL-38
Proteobacteria	Alphaproteobacteria	Rhodobacterales	Rhodobacteraceae	sf_1	6980	AJ582226.1	Loktanella vestfoldensis str. LMG 22003
Proteobacteria	Alphaproteobacteria	Rhodobacterales	Rhodobacteraceae	sf_1	6991	X53853.1	Rhodobacter sphaeroides str. 2.4.1
Proteobacteria	Alphaproteobacteria	Rhodobacterales	Rhodobacteraceae	sf_1	7026	AY005463.1	Leisingera methylohalidivorans str. MB2
Proteobacteria	Alphaproteobacteria	Rhodobacterales	Rhodobacteraceae	sf_1	7040	D32238.1	Paracoccus alcaliphilus str. JCM 7364
Proteobacteria	Alphaproteobacteria	Rhodobacterales	Rhodobacteraceae	sf_1	7084	AF359546.1	Scrippsiella trochoidea NEPCC 15
Proteobacteria	Alphaproteobacteria	Rhodobacterales	Rhodobacteraceae	sf_1	7125	AB006899.1	Paracoccus carotinifaciens str. E-396
Proteobacteria	Alphaproteobacteria	Rhodobacterales	Rhodobacteraceae	sf_1	7130	AJ440751.1	Gram-negative MM 1
Proteobacteria	Alphaproteobacteria	Rhodobacterales	Rhodobacteraceae	sf_1	7140	AJ582228.1	Loktanella salsilacus str. LMG 22000
Proteobacteria	Alphaproteobacteria	Rhodobacterales	Rhodobacteraceae	sf_1	7262	AB098590.1	Paracoccus pantotrophus str. TUT1022
Proteobacteria	Alphaproteobacteria	Rhodobacterales	Rhodobacteraceae	sf_1	7263
Proteobacteria	Alphaproteobacteria	Rhodobacterales	Rhodobacteraceae	sf_1	7325	Y13827.1	Paracoccus alkenifer str. A901/1
Proteobacteria	Alphaproteobacteria	Rhodobacterales	Rhodobacteraceae	sf_1	7383	AF305498.1	Roseobacter sp. str. KT0202a
Proteobacteria	Alphaproteobacteria	Rhodobacterales	Rhodobacteraceae	sf_1	7433	AF359537.1	Scrippsiella trochoidea NEPCC 15
Proteobacteria	Alphaproteobacteria	Rhodobacterales	Rhodobacteraceae	sf_1	7453	AJ534205.1	Sulfitobacter sp. BIO-11
Proteobacteria	Alphaproteobacteria	Rhodobacterales	Rhodobacteraceae	sf_1	7493	AY167339.1	Roseobacter sp. str. ARK9990
Proteobacteria	Alphaproteobacteria	Rickettsiales	Rickettsiaceae	sf_1	6809	U11021.1	Rickettsia rickettsii str. Sawtooth
Proteobacteria	Alphaproteobacteria	Rickettsiales	Rickettsiaceae	sf_1	7556	U11014.1	Rickettsia bellii str. strains 369-C and G2D42
Proteobacteria	Alphaproteobacteria	Acetobacterales	Roseococcaceae	sf_1	7500	AF407720.1	Great Artesian Basin clone B35
Proteobacteria	Alphaproteobacteria	Consistiales	SAR11	sf_2	7043	AF353223.1	marine clone Arctic95D-8
Proteobacteria	Alphaproteobacteria	Sphingomonadales	Sphingomonadaceae	sf_1	6650	AY563441.1	Sphingomonas phyllosphaerae str. FA1
Proteobacteria	Alphaproteobacteria	Sphingomonadales	Sphingomonadaceae	sf_1	6663	AY554010.1	Sphingopyxis flavimaris str. SW-151
Proteobacteria	Alphaproteobacteria	Sphingomonadales	Sphingomonadaceae	sf_1	6690	AY048657.1	Porphyrobacter tepidarius str. OK5APO
Proteobacteria	Alphaproteobacteria	Sphingomonadales	Sphingomonadaceae	sf_15	6700	AB033328.1	Porphyrobacter tepidarius str. DSM 10594
Proteobacteria	Alphaproteobacteria	Sphingomonadales	Sphingomonadaceae	sf_1	6749	AF468357.1	Arctic sea ice ARK10031
Proteobacteria	Alphaproteobacteria	Sphingomonadales	Sphingomonadaceae	sf_1	6800	AF143839.1	hydrocarbon-degrading consortium clone AF1.5
Proteobacteria	Alphaproteobacteria	Sphingomonadales	Sphingomonadaceae	sf_1	7016	AY167834.1	Sphingomonas sp. str. SAFR-027
Proteobacteria	Alphaproteobacteria	Sphingomonadales	Sphingomonadaceae	sf_15	7035	Y09639.1	Sphingomonas asaccharolytica str. IFO 10564-T
Proteobacteria	Alphaproteobacteria	Sphingomonadales	Sphingomonadaceae	sf_1	7036	AY026916.1	Lutibacterium anuloederans str. LC8
Proteobacteria	Alphaproteobacteria	Sphingomonadales	Sphingomonadaceae	sf_1	7048	AJ292599.1	PCB-polluted soil clone WD249
Proteobacteria	Alphaproteobacteria	Sphingomonadales	Sphingomonadaceae	sf_1	7075	AJ000920.2	Novosphingobium sp. str. K16
Proteobacteria	Alphaproteobacteria	Sphingomonadales	Sphingomonadaceae	sf_1	7090	AB024288.1	Blastomonas natatoria str. DSM 3183T
Proteobacteria	Alphaproteobacteria	Sphingomonadales	Sphingomonadaceae	sf_1	7100	D16147.1	Novosphingobium capsulatum str. GIFU11526
Proteobacteria	Alphaproteobacteria	Sphingomonadales	Sphingomonadaceae	sf_1	7319	AF425996.1	Anabaena circinalis AWQC118C isolate str. UNSW1
Proteobacteria	Alphaproteobacteria	Sphingomonadales	Sphingomonadaceae	sf_1	7440	AF159257.2	Sphingobium chungbukense str. DJ77
Proteobacteria	Alphaproteobacteria	Sphingomonadales	Sphingomonadaceae	sf_1	7445	AJ416410.1	Sphingopyxis witflariensis str. W-50
Proteobacteria	Alphaproteobacteria	Sphingomonadales	Sphingomonadaceae	sf_1	7528	D16145.1	Sphingobium yanoikuyae str. GIFU9882
Proteobacteria	Alphaproteobacteria	Sphingomonadales	Sphingomonadaceae	sf_1	7532	AF115500.1	Caulobacter sp. str. WCP2020S
Proteobacteria	Alphaproteobacteria	Sphingomonadales	Sphingomonadaceae	sf_1	7535	D16144.1	Sphingomonas paucimobilis str. GIFU2395
Proteobacteria	Alphaproteobacteria	Sphingomonadales	Sphingomonadaceae	sf_1	7537	AY250869.1	lichen-dominated Antarctic cryptoendolithic community clone FBP255 proteobacterium
Proteobacteria	Alphaproteobacteria	Sphingomonadales	Sphingomonadaceae	sf_1	7548	U87784.1	Afipia genosp. 13 str. G8991
Proteobacteria	Alphaproteobacteria	Rickettsiales	Unclassified	sf_2	6639
Proteobacteria	Alphaproteobacteria	Sphingomonadales	Unclassified	sf_1	6653	AY785128.1	Kaistobacter koreensis str. PB229
Proteobacteria	Alphaproteobacteria	Unclassified	Unclassified	sf_6	6665	AF143830.1	hydrocarbon-degrading consortium clone 4-Org2-22
Proteobacteria	Alphaproteobacteria	Unclassified	Unclassified	sf_6	6694	AF523879.1	forested wetland clone RCP2-92
Proteobacteria	Alphaproteobacteria	Unclassified	Unclassified	sf_2	6697	AB089090.1	termite gut homogenate clone Rs-D84 proteobacterium
Proteobacteria	Alphaproteobacteria	Rhizobiales	Unclassified	sf_1	6726
Proteobacteria	Alphaproteobacteria	Azospirillales	Unclassified	sf_1	6732	AF426002.1	Anabaena circinalis AWQC118C isolate str. UNSW7
Proteobacteria	Alphaproteobacteria	Consistiales	Unclassified	sf_5	6735	AF510192.1	Candidatus Pelagibacter ubique str. HTCC1002
Proteobacteria	Alphaproteobacteria	Consistiales	Unclassified	sf_4	6810	AY033325.1	marine bacterioplankton clone MB13F01
Proteobacteria	Alphaproteobacteria	Rhizobiales	Unclassified	sf_1	6899
Proteobacteria	Alphaproteobacteria	Unclassified	Unclassified	sf_6	6918	AJ581616.1	soil near uranium mill tailings clone KCM-C-45
Proteobacteria	Alphaproteobacteria	Unclassified	Unclassified	sf_6	6920	AY486423.1	Pseudovibrio denitrificans str. DN34
Proteobacteria	Alphaproteobacteria	Ellin329/Riz1046	Unclassified	sf_1	6945	AB081581.3	Rhizobiales str. A48
Proteobacteria	Alphaproteobacteria	Unclassified	Unclassified	sf_6	6946	AY221043.1	Mammoth cave clone CCM12a
Proteobacteria	Alphaproteobacteria	Unclassified	Unclassified	sf_6	6987
Proteobacteria	Alphaproteobacteria	Rhizobiales	Unclassified	sf_1	7012
Proteobacteria	Alphaproteobacteria	Rhodobacterales	Unclassified	sf_5	7025	AF382105.1	bacterioplankton clone ZA2526c
Proteobacteria	Alphaproteobacteria	Acetobacterales	Unclassified	sf_1	7028
Proteobacteria	Alphaproteobacteria	Rhizobiales	Unclassified	sf_1	7060
Proteobacteria	Alphaproteobacteria	Consistiales	Unclassified	sf_4	7105	AB186982.1	Mariana trough hydrothermal vent water 0.2micro-m filterable fraction clone MT-NB25
Proteobacteria	Alphaproteobacteria	Verorhodospirilla	Unclassified	sf_1	7109	AY189753.1	diesel-polluted Bohai Gulf isolate str. M-5 M-5
Proteobacteria	Alphaproteobacteria	Ellin314/wr0007	Unclassified	sf_1	7123	AJ518774.1	uranium mining waste pile near Johanngeorgenstadt soil clone JG37-AG-102
Proteobacteria	Alphaproteobacteria	Rickettsiales	Unclassified	sf_1	7156	AB089097.1	termite gut homogenate clone Rs-M62 proteobacterium
Proteobacteria	Alphaproteobacteria	Ellin329/Riz1046	Unclassified	sf_1	7182	AF498714.1	soil isolate Ellin332
Proteobacteria	Alphaproteobacteria	Unclassified	Unclassified	sf_2	7188	AB089085.1	termite gut homogenate clone Rs-B50 proteobacterium
Proteobacteria	Alphaproteobacteria	Ellin329/Riz1046	Unclassified	sf_1	7194	AF498744.1	soil isolate Ellin362
Proteobacteria	Alphaproteobacteria	Bradyrhizobiales	Unclassified	sf_1	7199	AJ532683.1	uranium mill tailings clone Gitt-KF-194
Proteobacteria	Alphaproteobacteria	Unclassified	Unclassified	sf_6	7207
Proteobacteria	Alphaproteobacteria	Ellin314/wr0007	Unclassified	sf_1	7222	AF407727.1	Great Artesian Basin clone B79
Proteobacteria	Alphaproteobacteria	Bradyrhizobiales	Unclassified	sf_1	7264	AF508112.1	Bosea thiooxidans TJ1
Proteobacteria	Alphaproteobacteria	Bradyrhizobiales	Unclassified	sf_1	7306	AF358017.1	peat soil microcosm clone LO13.3
Proteobacteria	Alphaproteobacteria	Unclassified	Unclassified	sf_6	7312
Proteobacteria	Alphaproteobacteria	Unclassified	Unclassified	sf_6	7340	AJ536878.1	uranium mining waste pile soil sample clone JG30-KF-AS50
Proteobacteria	Alphaproteobacteria	Unclassified	Unclassified	sf_6	7377	AY192273.1	Rocky Mountain alpine soil clone W2b-8C
Proteobacteria	Alphaproteobacteria	Azospirillales	Unclassified	sf_1	7400	AF524861.1	sphagnum peat bog clone K-5b5
Proteobacteria	Alphaproteobacteria	Unclassified	Unclassified	sf_6	7421
Proteobacteria	Alphaproteobacteria	Rhodobacterales	Unclassified	sf_5	7471	AJ347025.1	sponge clone TK03
Proteobacteria	Alphaproteobacteria	Unclassified	Unclassified	sf_6	7572
Proteobacteria	Alphaproteobacteria	Unclassified	Unclassified	sf_6	7575
Proteobacteria	Alphaproteobacteria	Unclassified	Unclassified	sf_6	7647
Proteobacteria	Alphaproteobacteria	Unclassified	Unclassified	sf_6	8780	AJ296549.1	uranium mining mill tailing clone GR-296.II.89 GR-296.II.89
Proteobacteria	Alphaproteobacteria	Bradyrhizobiales	Xanthobacteraceae	sf_1	6660	D11342.1	Azorhizobium caulinodans str. ORS 571
Proteobacteria	Betaproteobacteria	Burkholderiales	Alcaligenaceae	sf_1	7737	AY081977.1	atrazine-catabolizing microbial presence methanol clone KRA30+06A
Proteobacteria	Betaproteobacteria	Burkholderiales	Alcaligenaceae	sf_1	7768	AF371864.1	swine intestine clone p-861-a5
Proteobacteria	Betaproteobacteria	Burkholderiales	Alcaligenaceae	sf_1	7788	AY081994.1	atrazine-catabolizing microbial absence methanol clone KRA30-58
Proteobacteria	Betaproteobacteria	Burkholderiales	Alcaligenaceae	sf_1	7838	AB195161.1	Alcaligenes defragrans str. PD-19
Proteobacteria	Betaproteobacteria	Burkholderiales	Alcaligenaceae	sf_1	7902	AF155147.1	Alcaligenes faecalis str. M3A
Proteobacteria	Betaproteobacteria	Burkholderiales	Alcaligenaceae	sf_1	7932	AJ278451.1	Achromobacter subsp. denitrificans str. DSM 30026 (T)
Proteobacteria	Betaproteobacteria	Burkholderiales	Alcaligenaceae	sf_1	7984	AJ318125.1	Waste-gas biofilter clone BIfciii38
Proteobacteria	Betaproteobacteria	Burkholderiales	Alcaligenaceae	sf_1	7992	AJ509012.1	Alcaligenes faecalis 5659-H
Proteobacteria	Betaproteobacteria	Burkholderiales	Alcaligenaceae	sf_1	8062	AJ277742.1	Brackiella oedipodis str. LMG 1945 R8846
Proteobacteria	Betaproteobacteria	Burkholderiales	Alcaligenaceae	sf_1	8094	AF430122.1	Alcaligenes sp. str. VKM B-2263 dcm6
Proteobacteria	Betaproteobacteria	Burkholderiales	Burkholderiaceae	sf_1	7720	AY218566.1	penguin droppings sediments clone KD1-79
Proteobacteria	Betaproteobacteria	Burkholderiales	Burkholderiaceae	sf_1	7747
Proteobacteria	Betaproteobacteria	Burkholderiales	Burkholderiaceae	sf_1	7771	AB021374.1	Burkholderia glathei str. ATCC 29195T
Proteobacteria	Betaproteobacteria	Burkholderiales	Burkholderiaceae	sf_1	7782	AY040365.1	Burkholderia hospita str. LMG 20598T
Proteobacteria	Betaproteobacteria	Burkholderiales	Burkholderiaceae	sf_1	7914	AB021422.1	Burkholderia andropogonis str. ATCC 19311T
Proteobacteria	Betaproteobacteria	Burkholderiales	Burkholderiaceae	sf_1	7952	AF476092.1	Planococcus ficus symbiont
Proteobacteria	Betaproteobacteria	Burkholderiales	Burkholderiaceae	sf_1	7957	AF476089.1	Maconellicoccus hirsutus symbiont
Proteobacteria	Betaproteobacteria	Burkholderiales	Burkholderiaceae	sf_1	7959	AF476088.1	Maconellicoccus australiensis symbiont
Proteobacteria	Betaproteobacteria	Burkholderiales	Burkholderiaceae	sf_1	7960	AF476086.1	Ferrisia sp. symbiont
Proteobacteria	Betaproteobacteria	Burkholderiales	Burkholderiaceae	sf_1	8059	Y17010.1	Burkholderia caribensis str. MWAP71
Proteobacteria	Betaproteobacteria	Burkholderiales	Burkholderiaceae	sf_1	8068	X67039.1	Burkholderia caryophylli str. ATCC 25418
Proteobacteria	Betaproteobacteria	Burkholderiales	Burkholderiaceae	sf_1	8097	AB091761.1	Burkholderia cepacia
Proteobacteria	Betaproteobacteria	Burkholderiales	Comamonadaceae	sf_1	7807	Y18618.1	Aquaspirillum metamorphum str. DSM 1837
Proteobacteria	Betaproteobacteria	Burkholderiales	Comamonadaceae	sf_1	7856	AY169431.1	Variovorax paradoxus
Proteobacteria	Betaproteobacteria	Burkholderiales	Comamonadaceae	sf_1	7888	AB021420.1	Hydrogenophaga flava str. DSM 619T
Proteobacteria	Betaproteobacteria	Burkholderiales	Comamonadaceae	sf_1	7965	X72724.1	Anoxobacterium dechloraticum
Proteobacteria	Betaproteobacteria	Burkholderiales	Comamonadaceae	sf_1	7986	AF468446.1	Arctic sea ice ARK10281
Proteobacteria	Betaproteobacteria	Burkholderiales	Comamonadaceae	sf_1	7987	AB076844.1	Acidovorax sp. str. OS-6
Proteobacteria	Betaproteobacteria	Burkholderiales	Comamonadaceae	sf_1	8012	AJ420325.1	Acidovorax konjaci str. DSM 7481
Proteobacteria	Betaproteobacteria	Burkholderiales	Comamonadaceae	sf_1	8105	AF078768.1	Hydrogenophaga taeniospiralis str. ATCC 49743
Proteobacteria	Betaproteobacteria	Burkholderiales	Comamonadaceae	sf_1	8112	AF336312.1	Comamonas testosteroni str. SMCC B329
Proteobacteria	Betaproteobacteria	Burkholderiales	Comamonadaceae	sf_1	8139	AY899912.1	Delftia tsuruhatensis str. AD9
Proteobacteria	Betaproteobacteria	Burkholderiales	Comamonadaceae	sf_1	8152	AJ543434.1	nephridia Octolasion lacteum clone Ol2-2
Proteobacteria	Betaproteobacteria	Hydrogenophilales	Hydrogenophilaceae	sf_1	7706	AY219713.1	Petrobacter succinatimandens str. BON4
Proteobacteria	Betaproteobacteria	Hydrogenophilales	Hydrogenophilaceae	sf_1	7975	AY222297.1	silica sinter depositing geothermal power station discharge drain clone ST01-SN1D proteobacterium
Proteobacteria	Betaproteobacteria	Hydrogenophilales	Hydrogenophilaceae	sf_2	8756	X97534.1	Halothiobacillus sp.
Proteobacteria	Betaproteobacteria	Methylophilales	Methylophilaceae	sf_1	8137	AF289159.1	freshwater clone PRD01a011B
Proteobacteria	Betaproteobacteria	Neisseriales	Neisseriaceae	sf_1	7662	AF526930.2	Mars Odyssey Orbiter and encapsulation facility clone T5-1 sp.
Proteobacteria	Betaproteobacteria	Neisseriales	Neisseriaceae	sf_1	7675	AY157705.1	Neisseria sp. str. CCUG 46910
Proteobacteria	Betaproteobacteria	Neisseriales	Neisseriaceae	sf_1	7945	AB074518.1	Aquaspirillum serpens str. IAM 13944
Proteobacteria	Betaproteobacteria	Nitrosomonadales	Nitrosomonadaceae	sf_1	7682	AF363291.1	Nitrosovibrio sp. str. RY6A
Proteobacteria	Betaproteobacteria	Nitrosomonadales	Nitrosomonadaceae	sf_1	7770	BX321856.1	Nitrosomonas europaea str. ATCC 19718
Proteobacteria	Betaproteobacteria	Nitrosomonadales	Nitrosomonadaceae	sf_1	7789
Proteobacteria	Betaproteobacteria	Nitrosomonadales	Nitrosomonadaceae	sf_1	7796	AF080256.1	Nitrosospira sp. str. TYM9
Proteobacteria	Betaproteobacteria	Nitrosomonadales	Nitrosomonadaceae	sf_1	7805	AY123800.1	Nitrosospira briensis str. Nsp10
Proteobacteria	Betaproteobacteria	Nitrosomonadales	Nitrosomonadaceae	sf_1	7858
Proteobacteria	Betaproteobacteria	Nitrosomonadales	Nitrosomonadaceae	sf_1	7931	L35509.1	Nitrosospira multiformis
Proteobacteria	Betaproteobacteria	Nitrosomonadales	Nitrosomonadaceae	sf_1	8145	AY123795.1	Nitrosomonas eutropha str. Nm57
Proteobacteria	Betaproteobacteria	Burkholderiales	Oxalobacteraceae	sf_1	7843	U54470.1	Massilia timonae timone
Proteobacteria	Betaproteobacteria	Burkholderiales	Oxalobacteraceae	sf_1	7845	AB038368.1	Diaphorina citri symbiont
Proteobacteria	Betaproteobacteria	Burkholderiales	Oxalobacteraceae	sf_1	7866	AB021375.1	Paucimonas lemoignei str. ATCC 17989T
Proteobacteria	Betaproteobacteria	Burkholderiales	Oxalobacteraceae	sf_1	7878	AY250094.1	napthalene-contaminated sediment clone 29
Proteobacteria	Betaproteobacteria	Burkholderiales	Oxalobacteraceae	sf_1	7921	AY593479.1	Collimonas fungivorans str. Ter331
Proteobacteria	Betaproteobacteria	Burkholderiales	Oxalobacteraceae	sf_1	7968	U49757.2	Oxalobacter formigenes str. OXB ovinen rumen
Proteobacteria	Betaproteobacteria	Burkholderiales	Oxalobacteraceae	sf_1	8013	AF236013.1	isolate str. A1020
Proteobacteria	Betaproteobacteria	Burkholderiales	Oxalobacteraceae	sf_1	8032	AB074523.1	Aquaspirillum arcticum str. IAM 14963
Proteobacteria	Betaproteobacteria	Burkholderiales	Oxalobacteraceae	sf_1	8034	Y08845.1	Janthinobacterium agaricidamnosum str. W1r3T
Proteobacteria	Betaproteobacteria	Burkholderiales	Oxalobacteraceae	sf_1	8058	Y10146.1	Herbaspirillum seropedicae str. DSM 6445 ATCC 35892
Proteobacteria	Betaproteobacteria	Burkholderiales	Ralstoniaceae	sf_1	7761	AF280433.1	Ralstonia detusculanense str. APF11
Proteobacteria	Betaproteobacteria	Burkholderiales	Ralstoniaceae	sf_1	7778	AJ539233.1	Ralstonia insidiosa str. CCUG 46388
Proteobacteria	Betaproteobacteria	Burkholderiales	Ralstoniaceae	sf_1	7823	AF312022.1	Wautersia basilensis str. DSM 11853
Proteobacteria	Betaproteobacteria	Burkholderiales	Ralstoniaceae	sf_1	8110	AF085226.1	Wautersia paucula str. LMG 3413
Proteobacteria	Betaproteobacteria	Burkholderiales	Ralstoniaceae	sf_1	8128	M32021.1	Cupriavidus necator
Proteobacteria	Betaproteobacteria	Rhodocyclales	Rhodocyclaceae	sf_1	7762	AF150698.1	Elbe River snow isolate Iso18 Iso18_1411
Proteobacteria	Betaproteobacteria	Rhodocyclales	Rhodocyclaceae	sf_1	7779
Proteobacteria	Betaproteobacteria	Rhodocyclales	Rhodocyclaceae	sf_1	7800	AY013692.1	sample taken upstream landfill clone BVC77 landfill
Proteobacteria	Betaproteobacteria	Rhodocyclales	Rhodocyclaceae	sf_1	7817	AY133064.1	TCE-contaminated site clone ccs265
Proteobacteria	Betaproteobacteria	Rhodocyclales	Rhodocyclaceae	sf_1	7824	AB089101.1	termite gut homogenate clone Rs-B77 proteobacterium
Proteobacteria	Betaproteobacteria	Rhodocyclales	Rhodocyclaceae	sf_1	7907	AJ315680.1	Thauera aromatica str. LG356
Proteobacteria	Betaproteobacteria	Rhodocyclales	Rhodocyclaceae	sf_1	7925	Y17591.1	Thauera selenatis str. ATCC 55363T
Proteobacteria	Betaproteobacteria	Rhodocyclales	Rhodocyclaceae	sf_1	7956
Proteobacteria	Betaproteobacteria	Rhodocyclales	Rhodocyclaceae	sf_1	8052	AY032610.1	Dechloromonas aromatica str. RCB
Proteobacteria	Betaproteobacteria	Rhodocyclales	Rhodocyclaceae	sf_1	8156	AY098637.2	industrial-phenol-degrading community clone MM1 sp.
Proteobacteria	Betaproteobacteria	Ellin6095/SC-I-39	Unclassified	sf_1	7671	AY221080.1	Mammoth cave clone CCU24
Proteobacteria	Betaproteobacteria	MND1 clone group	Unclassified	sf_1	7750	AJ518782.1	uranium mining waste pile near Johanngeorgenstadt soil clone JG37-AG-35
Proteobacteria	Betaproteobacteria	Unclassified	Unclassified	sf_3	7765
Proteobacteria	Betaproteobacteria	Ellin6095/SC-I-39	Unclassified	sf_1	7766
Proteobacteria	Betaproteobacteria	Burkholderiales	Unclassified	sf_1	7879
Proteobacteria	Betaproteobacteria	Unclassified	Unclassified	sf_3	7954
Proteobacteria	Betaproteobacteria	Unclassified	Unclassified	sf_3	7974
Proteobacteria	Betaproteobacteria	MND1 clone group	Unclassified	sf_1	7993	AF423222.1	soil clone 1326-2
Proteobacteria	Betaproteobacteria	MND1 clone group	Unclassified	sf_1	8023	AF293006.1	ferromanganous micronodule clone MND1
Proteobacteria	Betaproteobacteria	Burkholderiales	Unclassified	sf_1	8035
Proteobacteria	Betaproteobacteria	Neisseriales	Unclassified	sf_1	8037	AY323827.1	Chitinimonas taiwanensis str. cf
Proteobacteria	Betaproteobacteria	Burkholderiales	Unclassified	sf_1	8087
Proteobacteria	Betaproteobacteria	Unclassified	Unclassified	sf_3	8114
Proteobacteria	Deltaproteobacteria	Bdellovibrionales	Bdellovibrionaceae	sf_1	10010	AJ518802.1	uranium mining waste pile clone JG37-AG-139 proteobacterium
Proteobacteria	Deltaproteobacteria	Desulfobacterales	Desulfoarculaceae	sf_2	10227	AY193132.1	marine sediment clone Bol11
Proteobacteria	Deltaproteobacteria	Desulfobacterales	Desulfobacteraceae	sf_5	9666	AJ535229.1	marine sediment above hydrate ridge clone Hyd89-13 proteobacterium
Proteobacteria	Deltaproteobacteria	Desulfobacterales	Desulfobacteraceae	sf_5	9681	AJ430774.1	sediment isolate str. EbS7
Proteobacteria	Deltaproteobacteria	Desulfobacterales	Desulfobacteraceae	sf_5	9777	AY197376.1	Guaymas Basin hydrothermal vent sediments clone B01R004
Proteobacteria	Deltaproteobacteria	Desulfobacterales	Desulfobacteraceae	sf_5	9800	AF523960.1	forested wetland clone FW57
Proteobacteria	Deltaproteobacteria	Desulfobacterales	Desulfobacteraceae	sf_5	9818	AY216453.1	temperate estuarine mud clone KM62
Proteobacteria	Deltaproteobacteria	Desulfobacterales	Desulfobacteraceae	sf_5	9821
Proteobacteria	Deltaproteobacteria	Desulfobacterales	Desulfobacteraceae	sf_5	9875	AF420354.1	hydrothermal sediment clone AF420354
Proteobacteria	Deltaproteobacteria	Desulfobacterales	Desulfobacteraceae	sf_5	9885	AJ012596.1	Sulfate reducing field soil and on rice roots Desulfobacteriaceae
Proteobacteria	Deltaproteobacteria	Desulfobacterales	Desulfobacteraceae	sf_5	9939	AF354163.1	marine methane seep clone 1427
Proteobacteria	Deltaproteobacteria	Desulfobacterales	Desulfobacteraceae	sf_5	9940	AY177800.1	Antarctic sediment clone SB2_56
Proteobacteria	Deltaproteobacteria	Desulfobacterales	Desulfobacteraceae	sf_5	10031	AY177795.1	Antarctic sediment clone SB1_49
Proteobacteria	Deltaproteobacteria	Desulfobacterales	Desulfobacteraceae	sf_5	10046	AJ237603.1	Desulfobacterium cetonicum str. DSM 7267 oil recovery water
Proteobacteria	Deltaproteobacteria	Desulfobacterales	Desulfobacteraceae	sf_5	10083	AF418175.1	Desulfobacter curvatus str. DSM 3379
Proteobacteria	Deltaproteobacteria	Desulfobacterales	Desulfobacteraceae	sf_5	10136	AY197382.1	Guaymas Basin hydrothermal vent sediments clone B01R011
Proteobacteria	Deltaproteobacteria	Desulfobacterales	Desulfobacteraceae	sf_5	10268
Proteobacteria	Deltaproteobacteria	Desulfobacterales	Desulfobacteraceae	sf_5	10319	AY083017.1	sulfate-reducing habitat clone SLM-CP-116
Proteobacteria	Deltaproteobacteria	Desulfobacterales	Desulfobacteraceae	sf_5	10364	AY771936.1	marine surface sediment clone SB2
Proteobacteria	Deltaproteobacteria	Desulfobacterales	Desulfobulbaceae	sf_1	9705	AJ535237.1	marine sediment above hydrate ridge clone Hyd01-n proteobacterium
Proteobacteria	Deltaproteobacteria	Desulfobacterales	Desulfobulbaceae	sf_1	9734	AF449229.1	Riftia pachyptila's tube clone R103-B13
Proteobacteria	Deltaproteobacteria	Desulfobacterales	Desulfobulbaceae	sf_1	9739	AJ535252.1	gas hydrate clone Hyd89-51
Proteobacteria	Deltaproteobacteria	Desulfobacterales	Desulfobulbaceae	sf_1	10047	AY355301.1	epibiontic clone C11-D3
Proteobacteria	Deltaproteobacteria	Desulfobacterales	Desulfobulbaceae	sf_1	10062	AJ535241.1	marine sediment above hydrate ridge clone Hyd24-11 proteobacterium
Proteobacteria	Deltaproteobacteria	Desulfobacterales	Desulfobulbaceae	sf_1	10097	AB100004.1	inactive deep-sea hydrothermal vent chimneys clone IndB2-42
Proteobacteria	Deltaproteobacteria	Desulfobacterales	Desulfobulbaceae	sf_1	10187	AF507840.1	Mono Lake at depth 23 m station 6 July 2000 clone ML623J-57 proteobacterium
Proteobacteria	Deltaproteobacteria	Desulfobacterales	Desulfobulbaceae	sf_1	10332	AF099059.1	Psychrophilic sulfate-reducing isolate str. LSv23 bacterium
Proteobacteria	Deltaproteobacteria	Desulfovibrionales	Desulfohalobiaceae	sf_1	9894	AF524933.1	Desulfonauticus submarinus str. 6N
Proteobacteria	Deltaproteobacteria	Desulfovibrionales	Desulfohalobiaceae	sf_1	10069
Proteobacteria	Deltaproteobacteria	Desulfovibrionales	Desulfomicrobiaceae	sf_1	10079	AJ277896.1	Desulfomicrobium baculatum str. DSM 1742
Proteobacteria	Deltaproteobacteria	Desulfovibrionales	Desulfomicrobiaceae	sf_1	10370	AF030438.1	Desulfomicrobium baculatum str. X; VKM B-1378; DSM 4
Proteobacteria	Deltaproteobacteria	Desulfovibrionales	Desulfovibrionaceae	sf_1	9709	AB089104.1	termite gut homogenate clone Rs-N31 proteobacterium
Proteobacteria	Deltaproteobacteria	Desulfovibrionales	Desulfovibrionaceae	sf_1	9711	AF418172.1	Desulfovibrio profundus str. DSM 11384
Proteobacteria	Deltaproteobacteria	Desulfovibrionales	Desulfovibrionaceae	sf_1	9826	AB089108.2	termite gut homogenate clone Rs-M72 proteobacterium
Proteobacteria	Deltaproteobacteria	Desulfovibrionales	Desulfovibrionaceae	sf_1	10016	AB089110.1	termite gut homogenate clone Rs-N35 proteobacterium
Proteobacteria	Deltaproteobacteria	Desulfovibrionales	Desulfovibrionaceae	sf_1	10071	M34113.1	Desulfovibrio desulfuricans
Proteobacteria	Deltaproteobacteria	Desulfovibrionales	Desulfovibrionaceae	sf_1	10189
Proteobacteria	Deltaproteobacteria	Desulfovibrionales	Desulfovibrionaceae	sf_1	10212
Proteobacteria	Deltaproteobacteria	Desulfovibrionales	Desulfovibrionaceae	sf_1	10244
Proteobacteria	Deltaproteobacteria	Desulfovibrionales	Desulfovibrionaceae	sf_1	10248	AF418170.1	Desulfovibrio giganteus str. DSM 4370
Proteobacteria	Deltaproteobacteria	Desulfovibrionales	Desulfovibrionaceae	sf_1	10262	AF228127.2	Desulfovibrio sp. str. Ac5.2
Proteobacteria	Deltaproteobacteria	Desulfuromonadales	Desulfuromonaceae	sf_1	10020	AJ519664.1	uranium mill tailings soil sample clone GuBH2-AG-114 proteobacterium
Proteobacteria	Deltaproteobacteria	Desulfuromonadales	Desulfuromonaceae	sf_1	10026	AY185329.1	Desulfuromonas sp. clone AKS68
Proteobacteria	Deltaproteobacteria	Desulfuromonadales	Geobacteraceae	sf_1	482	AF529120.1	trichloroethene-contaminated site clone FTLM205 proteobacterium
Proteobacteria	Deltaproteobacteria	Desulfuromonadales	Geobacteraceae	sf_1	9956	AF523968.1	forested wetland clone FW140
Proteobacteria	Deltaproteobacteria	Desulfuromonadales	Geobacteraceae	sf_1	10171
Proteobacteria	Deltaproteobacteria	Desulfobacterales	Nitrospinaceae	sf_2	594	AJ296568.1	uranium mining mill tailing clone GR-296.II.52 GR-296.I.52
Proteobacteria	Deltaproteobacteria	Myxococcales	Polyangiaceae	sf_3	9671	AF420357.1	hydrothermal sediment clone AF420357
Proteobacteria	Deltaproteobacteria	Myxococcales	Polyangiaceae	sf_4	9733	AF382143.1	bacterioplankton clone ZA3735c
Proteobacteria	Deltaproteobacteria	Myxococcales	Polyangiaceae	sf_3	9735	AJ518790.1	uranium mining waste pile clone JG37-AG-15 proteobacterium
Proteobacteria	Deltaproteobacteria	Myxococcales	Polyangiaceae	sf_3	9755	AF382126.1	bacterioplankton clone ZA3704c
Proteobacteria	Deltaproteobacteria	Myxococcales	Polyangiaceae	sf_3	9874	AJ532714.1	uranium mining waste pile clone JG34-KF-243 proteobacterium
Proteobacteria	Deltaproteobacteria	Myxococcales	Polyangiaceae	sf_3	9900	AF280857.1	bioreactor clone mle1-27
Proteobacteria	Deltaproteobacteria	Myxococcales	Polyangiaceae	sf_3	10065	AF387628.1	Polyangium cellulosum str. 87-5
Proteobacteria	Deltaproteobacteria	Myxococcales	Polyangiaceae	sf_3	10082	AJ518792.1	uranium mining waste pile clone JG37-AG-33 proteobacterium
Proteobacteria	Deltaproteobacteria	Myxococcales	Polyangiaceae	sf_3	10249	AJ534629.1	soil sample uranium mining waste pile near town Johanngeorgenstadt clone JG36-TzT-168 proteobacterium
Proteobacteria	Deltaproteobacteria	Myxococcales	Polyangiaceae	sf_3	10298	AY193162.1	marine tidal mat clone BTM36
Proteobacteria	Deltaproteobacteria	Myxococcales	Polyangiaceae	sf_3	10309	AJ233947.1	Nannocystis exedens str. Na e571
Proteobacteria	Deltaproteobacteria	Myxococcales	Polyangiaceae	sf_3	10353	AF234747.1	sludge clone A9
Proteobacteria	Deltaproteobacteria	Syntrophobacterales	Syntrophaceae	sf_3	9665	X85132.1	Syntrophus gentianae str. HQgoe1
Proteobacteria	Deltaproteobacteria	Syntrophobacterales	Syntrophaceae	sf_3	9935	AF523957.1	forested wetland clone FW117
Proteobacteria	Deltaproteobacteria	Syntrophobacterales	Syntrophaceae	sf_3	10067	AF323766.1	benzoate-degrading consortium clone BA044
Proteobacteria	Deltaproteobacteria	Syntrophobacterales	Syntrophobacteraceae	sf_1	9661	AJ306805.1	DCP-dechlorinating consortium clone SHD-1
Proteobacteria	Deltaproteobacteria	Syntrophobacterales	Syntrophobacteraceae	sf_1	9731	AJ518795.1	uranium mining waste pile clone JG37-AG-90 proteobacterium
Proteobacteria	Deltaproteobacteria	Syntrophobacterales	Syntrophobacteraceae	sf_1	9845	AJ518800.1	uranium mining waste pile clone JG37-AG-128 proteobacterium
Proteobacteria	Deltaproteobacteria	Syntrophobacterales	Syntrophobacteraceae	sf_1	9864	AJ518801.1	uranium mining waste pile clone JG37-AG-133 proteobacterium
Proteobacteria	Deltaproteobacteria	Syntrophobacterales	Syntrophobacteraceae	sf_1	10013	AF420341.2	hydrothermal sediment clone AF420341
Proteobacteria	Deltaproteobacteria	Syntrophobacterales	Syntrophobacteraceae	sf_1	10021	AJ519630.1	uranium mill tailings soil sample clone Sh765B-TzT-29 proteobacterium
Proteobacteria	Deltaproteobacteria	Syntrophobacterales	Syntrophobacteraceae	sf_1	10184	AF482435.1	granular sludge clone R1p32
Proteobacteria	Deltaproteobacteria	Syntrophobacterales	Syntrophobacteraceae	sf_1	10221	AF482439.1	granular sludge clone R3p4
Proteobacteria	Deltaproteobacteria	Syntrophobacterales	Syntrophobacteraceae	sf_1	10294	AF170417.1	Desulfacinum hydrothermale str. MT-96
Proteobacteria	Deltaproteobacteria	Unclassified	Unclassified	sf_9	244	AY093483.1	deep marine sediment clone MB-C2-152
Proteobacteria	Deltaproteobacteria	Desulfobacterales	Unclassified	sf_3	468	AJ241004.1	marine sediment clone Sva0515
Proteobacteria	Deltaproteobacteria	AMD clone group	Unclassified	sf_1	3084	AF523884.1	coal effluent wetland clone RCP216
Proteobacteria	Deltaproteobacteria	AMD clone group	Unclassified	sf_1	6830	AF523882.1	coal effluent wetland clone RCP124
Proteobacteria	Deltaproteobacteria	Bdellovibrionales	Unclassified	sf_1	7382	AF355039.1	marine clone Arctic95C-5
Proteobacteria	Deltaproteobacteria	EB1021 group	Unclassified	sf_4	8169	AF523886.1	forested wetland clone RCP2-54
Proteobacteria	Deltaproteobacteria	AMD clone group	Unclassified	sf_1	9678	AF523883.1	coal effluent wetland clone RCP185
Proteobacteria	Deltaproteobacteria	Unclassified	Unclassified	sf_9	9738	AF354149.1	marine methane seep clone 1513
Proteobacteria	Deltaproteobacteria	EB1021 group	Unclassified	sf_4	9741	AJ518791.1	uranium mining waste pile clone JG37-AG-30 proteobacterium
Proteobacteria	Deltaproteobacteria	Unclassified	Unclassified	sf_9	9760	AY093467.1	deep marine sediment clone MB-A2-137
Proteobacteria	Deltaproteobacteria	Unclassified	Unclassified	sf_9	9784	AY177804.1	Antarctic sediment clone LH5_30
Proteobacteria	Deltaproteobacteria	Unclassified	Unclassified	sf_9	9798	AJ519663.1	uranium mill tailings soil sample clone GuBH2-AD/TzT-67 proteobacterium
Proteobacteria	Deltaproteobacteria	Desulfobacterales	Unclassified	sf_3	9813	AF420340.1	hydrothermal sediment clone AF420340
Proteobacteria	Deltaproteobacteria	Desulfovibrionales	Unclassified	sf_1	9828	AB089109.1	termite gut homogenate clone Rs-M89 proteobacterium
Proteobacteria	Deltaproteobacteria	Unclassified	Unclassified	sf_9	9876	AY093471.1	deep marine sediment clone MB-B2-106
Proteobacteria	Deltaproteobacteria	EB1021 group	Unclassified	sf_4	9884	AF523885.1	forested wetland clone RCP2-62
Proteobacteria	Deltaproteobacteria	Unclassified	Unclassified	sf_9	9890	AB089106.1	termite gut homogenate clone Rs-K70 proteobacterium
Proteobacteria	Deltaproteobacteria	AMD clone group	Unclassified	sf_1	9945	AF225446.1	acid mine drainage clone BA18
Proteobacteria	Deltaproteobacteria	Desulfobacterales	Unclassified	sf_4	9951	AF523973.1	forested wetland clone FW13
Proteobacteria	Deltaproteobacteria	dechlorinating clone group	Unclassified	sf_1	9959	AF523965.1	forested wetland clone FW110
Proteobacteria	Deltaproteobacteria	Unclassified	Unclassified	sf_9	9975	AY133092.1	TCE-contaminated site clone ccslm247
Proteobacteria	Deltaproteobacteria	Unclassified	Unclassified	sf_9	9993
Proteobacteria	Deltaproteobacteria	EB1021 group	Unclassified	sf_4	10024	AF420338.1	hydrothermal sediment clone AF420338
Proteobacteria	Deltaproteobacteria	Unclassified	Unclassified	sf_7	10048
Proteobacteria	Deltaproteobacteria	Unclassified	Unclassified	sf_9	10049	AJ306774.1	DCP-dechlorinating consortium clone SHA-72
Proteobacteria	Deltaproteobacteria	Desulfuromonadales	Unclassified	sf_1	10076	AF407700.1	Great Artesian Basin clone G13
Proteobacteria	Deltaproteobacteria	AMD clone group	Unclassified	sf_1	10084	AF543496.1	acid mine drainage clone AS6
Proteobacteria	Deltaproteobacteria	Myxococcales	Unclassified	sf_1	10092	AY102330.1	heavy metal-contaminated soil clone a13134
Proteobacteria	Deltaproteobacteria	Myxococcales	Unclassified	sf_1	10259
Proteobacteria	Epsilonproteobacteria	Campylobacterales	Campylobacteraceae	sf_3	10397	AB030592.1	groundwater clone 1006
Proteobacteria	Epsilonproteobacteria	Campylobacterales	Campylobacteraceae	sf_3	10402	AB015256.1	deepest cold-seep area Japan Trench clone JTB129 proteobacterium
Proteobacteria	Epsilonproteobacteria	Campylobacterales	Campylobacteraceae	sf_3	10446
Proteobacteria	Epsilonproteobacteria	Campylobacterales	Campylobacteraceae	sf_3	10447	Y13671.1	Sulfurospirillum deleyianum str. Spirillum 5175
Proteobacteria	Epsilonproteobacteria	Campylobacterales	Campylobacteraceae	sf_3	10456	L06975.1	Campylobacter showae
Proteobacteria	Epsilonproteobacteria	Campylobacterales	Campylobacteraceae	sf_3	10464	AY135395.1	Campylobacter sp. str. NO2B
Proteobacteria	Epsilonproteobacteria	Campylobacterales	Campylobacteraceae	sf_3	10484	U03022.1	Campylobacter helveticus
Proteobacteria	Epsilonproteobacteria	Campylobacterales	Campylobacteraceae	sf_3	10523	AF449239.1	Riftia pachyptila's tube clone R103-B70
Proteobacteria	Epsilonproteobacteria	Campylobacterales	Campylobacteraceae	sf_3	10538	L14624.1	Arcobacter cryaerophilus
Proteobacteria	Epsilonproteobacteria	Campylobacterales	Campylobacteraceae	sf_3	10540	AF550655.1	Campylobacter showae str. LMG 12636
Proteobacteria	Epsilonproteobacteria	Campylobacterales	Helicobacteraceae	sf_3	10385
Proteobacteria	Epsilonproteobacteria	Campylobacterales	Helicobacteraceae	sf_3	10411	AB089112.2	termite gut homogenate clone Rs-P71 proteobacterium
Proteobacteria	Epsilonproteobacteria	Campylobacterales	Helicobacteraceae	sf_3	10417	AY216452.1	temperate estuarine mud clone KM61
Proteobacteria	Epsilonproteobacteria	Campylobacterales	Helicobacteraceae	sf_3	10425	AB088432.1	Sulfurimonas autotrophica str. OK5
Proteobacteria	Epsilonproteobacteria	Campylobacterales	Helicobacteraceae	sf_3	10428	AF034135.1	Flexispira rappini FH 9702248
Proteobacteria	Epsilonproteobacteria	Campylobacterales	Helicobacteraceae	sf_3	10430	AF506783.1	Helicobacter heilmannii str. MM2
Proteobacteria	Epsilonproteobacteria	Campylobacterales	Helicobacteraceae	sf_3	10432	AF449246.1	Riftia pachyptila's tube clone R76-B51
Proteobacteria	Epsilonproteobacteria	Campylobacterales	Helicobacteraceae	sf_3	10436	AF297868.1	Helicobacter aurati str. MIT 97-5075c
Proteobacteria	Epsilonproteobacteria	Campylobacterales	Helicobacteraceae	sf_3	10438	AF154101.1	hydrocarbon seep clone GCA014
Proteobacteria	Epsilonproteobacteria	Campylobacterales	Helicobacteraceae	sf_3	10442	AF292378.1	Helicobacter cetorum str. MIT 99-5656
Proteobacteria	Epsilonproteobacteria	Campylobacterales	Helicobacteraceae	sf_23	10443	U00679.1	Helicobacter pylori str. 85D08
Proteobacteria	Epsilonproteobacteria	Campylobacterales	Helicobacteraceae	sf_3	10444	AB006148.1	Helicobacter suncus str. Kaz-2
Proteobacteria	Epsilonproteobacteria	Campylobacterales	Helicobacteraceae	sf_3	10448	U51870.1	Helicobacter felis str. Dog-1
Proteobacteria	Epsilonproteobacteria	Campylobacterales	Helicobacteraceae	sf_3	10451	AF506779.1	Helicobacter heilmannii str. C4S
Proteobacteria	Epsilonproteobacteria	Campylobacterales	Helicobacteraceae	sf_3	10454	L36143.1	Helicobacter pullorum str. NCTC 12826
Proteobacteria	Epsilonproteobacteria	Campylobacterales	Helicobacteraceae	sf_3	10462	U96297.1	Helicobacter rodentium str. MIT 96-1312
Proteobacteria	Epsilonproteobacteria	Campylobacterales	Helicobacteraceae	sf_3	10467
Proteobacteria	Epsilonproteobacteria	Campylobacterales	Helicobacteraceae	sf_3	10482	AJ441202.1	hydrothermal vent polychaete mucous clone P. palm C 140
Proteobacteria	Epsilonproteobacteria	Campylobacterales	Helicobacteraceae	sf_3	10507	AB089111.2	termite gut homogenate clone Rs-M59 proteobacterium
Proteobacteria	Epsilonproteobacteria	Campylobacterales	Helicobacteraceae	sf_3	10518	X67854.1	Helicobacter pylori str. ATCC 49396T
Proteobacteria	Epsilonproteobacteria	Campylobacterales	Helicobacteraceae	sf_3	10520	AJ249858.1	Helicobacter sp. blood isolate 964
Proteobacteria	Epsilonproteobacteria	Campylobacterales	Helicobacteraceae	sf_3	10548	AF286052.1	Helicobacter rappini W.Tee-Bat
Proteobacteria	Epsilonproteobacteria	Campylobacterales	Helicobacteraceae	sf_3	10552	AF363062.1	Helicobacter winghamensis str. NLEP 97-1611
Proteobacteria	Epsilonproteobacteria	Campylobacterales	Helicobacteraceae	sf_3	10562	AF286053.1	Helicobacter rappini W.Tee-Yu
Proteobacteria	Epsilonproteobacteria	Campylobacterales	Helicobacteraceae	sf_3	10576	AF142585.1	Helicobacter sp. 'liver 3' str. liver 3
Proteobacteria	Epsilonproteobacteria	Campylobacterales	Helicobacteraceae	sf_3	10590	AB089113.1	termite gut homogenate clone Rs-H40 proteobacterium
Proteobacteria	Epsilonproteobacteria	Campylobacterales	Helicobacteraceae	sf_3	10602
Proteobacteria	Epsilonproteobacteria	Campylobacterales	Helicobacteraceae	sf_3	10612	AJ441209.1	hydrothermal vent polychaete mucous clone P. palm C/A 64
Proteobacteria	Epsilonproteobacteria	Campylobacterales	Helicobacteraceae	sf_3	10614	AJ431216.1	strain isolate str. BHI80-49
Proteobacteria	Epsilonproteobacteria	Nautiliales	Nautiliaceae	sf_1	10477	AF299130.1	S17sBac5 complete clone
Proteobacteria	Epsilonproteobacteria	Campylobacterales	Unclassified	sf_1	10407	AF420342.1	hydrothermal sediment clone AF420342
Proteobacteria	Epsilonproteobacteria	Campylobacterales	Unclassified	sf_1	10427	AY672515.1	hydrothermal vent 9 degrees North East Rise Pacific Ocean clone CH3_17_BAC_16SrRNA_9N_EPR
Proteobacteria	Epsilonproteobacteria	Campylobacterales	Unclassified	sf_1	10473	U29081.1	Rimicaris exoculata ectosymbiont
Proteobacteria	Epsilonproteobacteria	Campylobacterales	Unclassified	sf_1	10475	AF420359.1	hydrothermal sediment clone AF420359
Proteobacteria	Epsilonproteobacteria	Campylobacterales	Unclassified	sf_1	10480	AJ441204.1	hydrothermal vent polychaete mucous clone P. palm C 84
Proteobacteria	Epsilonproteobacteria	Campylobacterales	Unclassified	sf_1	10489	AF299121.1	S17sBac16 complete clone
Proteobacteria	Epsilonproteobacteria	Campylobacterales	Unclassified	sf_1	10497	AY261811.1	UASB reactor granular sludge clone PD-UASB-2 proteobacterium
Proteobacteria	Epsilonproteobacteria	Campylobacterales	Unclassified	sf_1	10530	AY672531.1	hydrothermal vent 9 degrees North East Rise Pacific Ocean clone CH5_6_BAC_16SrRNA_9N_EPR
Proteobacteria	Epsilonproteobacteria	Campylobacterales	Unclassified	sf_1	10543	U15103.1	hydrothermal vent clone PVB_10
Proteobacteria	Epsilonproteobacteria	Campylobacterales	Unclassified	sf_1	10622
Proteobacteria	Gammaproteobacteria	Acidithiobacillales	Acidithiobacillaceae	sf_1	8320	AF543507.1	acid mine drainage clone BA11
Proteobacteria	Gammaproteobacteria	Acidithiobacillales	Acidithiobacillaceae	sf_1	8552	AJ278723.1	Acidithiobacillus ferrooxidans str. D2
Proteobacteria	Gammaproteobacteria	Acidithiobacillales	Acidithiobacillaceae	sf_1	8913	AJ535246.1	marine sediment above hydrate ridge clone Hyd89-87 proteobacterium
Proteobacteria	Gammaproteobacteria	Acidithiobacillales	Acidithiobacillaceae	sf_1	9224	AJ459804.1	Acidithiobacillus albertensis str. DSM 14366
Proteobacteria	Gammaproteobacteria	Aeromonadales	Aeromonadaceae	sf_1	8340	X71120.1	Aeromonas ichthiosmia
Proteobacteria	Gammaproteobacteria	Aeromonadales	Aeromonadaceae	sf_1	8364	S39232.1	Aeromonas allosaccharophila str. CECT 4199
Proteobacteria	Gammaproteobacteria	Aeromonadales	Aeromonadaceae	sf_1	8621	AF427150.1	Aeromonas sp. PAR2A
Proteobacteria	Gammaproteobacteria	Aeromonadales	Aeromonadaceae	sf_1	9000	AF170914.4	Aeromonas culicicola str. MTCC 3249
Proteobacteria	Gammaproteobacteria	Aeromonadales	Aeromonadaceae	sf_1	9026	AJ009860.1	Haemophilus piscium str. NCIMB 1952
Proteobacteria	Gammaproteobacteria	Aeromonadales	Aeromonadaceae	sf_1	9245	AB105442.1	Batch reactor filled with cyanobacterial bloom and lake water clone -8
Proteobacteria	Gammaproteobacteria	Aeromonadales	Aeromonadaceae	sf_1	9294	AJ557849.1	Arctic deep sea Isolation common chemoorganotrophic oxygen-respiring polar current d 1210 (50 m above sediment Hakon Mosby Mud Vulcano (HMMV 72N 14E)) via serial dilution series applying 2 g/l yeast or meat extract artifical seawater
Proteobacteria	Gammaproteobacteria	Aeromonadales	Aeromonadaceae	sf_1	9440	X60412.1	Aeromonas sobria str. NCIMB 12065
Proteobacteria	Gammaproteobacteria	Aeromonadales	Aeromonadaceae	sf_1	9494	AY532691.1	Aeromonas molluscorum str. 849T
Proteobacteria	Gammaproteobacteria	Oceanospirillales	Alcanivoraceae	sf_1	8335	AB055205.1	Alcanivorax sp. str. K3-3 (MBIC 4323)
Proteobacteria	Gammaproteobacteria	Oceanospirillales	Alcanivoraceae	sf_1	9658	AB053127.1	Alcanivorax sp. str. Haw1
Proteobacteria	Gammaproteobacteria	Alteromonadales	Alteromonadaceae	sf_1	8172	AB055791.1	Pseudoalteromonas sp. str. Bdeep-1
Proteobacteria	Gammaproteobacteria	Alteromonadales	Alteromonadaceae	sf_1	8174	AF114499.1	attached marine recovered surface clone 17 proteobacterium
Proteobacteria	Gammaproteobacteria	Alteromonadales	Alteromonadaceae	sf_1	8196
Proteobacteria	Gammaproteobacteria	Alteromonadales	Alteromonadaceae	sf_1	8211	AB002630.1	Colwellia maris str. ABE-1
Proteobacteria	Gammaproteobacteria	Alteromonadales	Alteromonadaceae	sf_1	8222
Proteobacteria	Gammaproteobacteria	Alteromonadales	Alteromonadaceae	sf_1	8318	AY207502.1	Aestuariibacter salexigens str. JC2042
Proteobacteria	Gammaproteobacteria	Alteromonadales	Alteromonadaceae	sf_1	8336	AF237977.1	Alteromonas sp. str. MS23
Proteobacteria	Gammaproteobacteria	Alteromonadales	Alteromonadaceae	sf_1	8348	AF468388.1	Arctic sea ice ARK10038
Proteobacteria	Gammaproteobacteria	Alteromonadales	Alteromonadaceae	sf_1	8368	AJ507251.1	Pseudoalteromonas mariniglutinosa str. KMM 3635
Proteobacteria	Gammaproteobacteria	Alteromonadales	Alteromonadaceae	sf_1	8371
Proteobacteria	Gammaproteobacteria	Alteromonadales	Alteromonadaceae	sf_1	8374	AB076560.1	Agarivorans albus str. MKT 89
Proteobacteria	Gammaproteobacteria	Alteromonadales	Alteromonadaceae	sf_1	8484	AF513454.1	Alteromonadaceae isolate str. LA50
Proteobacteria	Gammaproteobacteria	Alteromonadales	Alteromonadaceae	sf_1	8503	AF468401.1	Arctic sea ice ARK10244
Proteobacteria	Gammaproteobacteria	Alteromonadales	Alteromonadaceae	sf_1	8520	AB059262.1	Moritella sp. str. PS10-13
Proteobacteria	Gammaproteobacteria	Alteromonadales	Alteromonadaceae	sf_1	8533
Proteobacteria	Gammaproteobacteria	Alteromonadales	Alteromonadaceae	sf_1	8578	AY147906.1	Marinobacter lipolyticus str. SM-19
Proteobacteria	Gammaproteobacteria	Alteromonadales	Alteromonadaceae	sf_1	8579	AJ416756.1	Psychromonas profunda str. 2825
Proteobacteria	Gammaproteobacteria	Alteromonadales	Alteromonadaceae	sf_1	8580	AJ295713.1	Arctic seawater isolate str. R7076
Proteobacteria	Gammaproteobacteria	Alteromonadales	Alteromonadaceae	sf_1	8600	AB094412.1	Colwellia piezophila str. Y223G
Proteobacteria	Gammaproteobacteria	Alteromonadales	Alteromonadaceae	sf_1	8643	AY771715.1	Pseudoalteromonas porphyrae str. S2-65
Proteobacteria	Gammaproteobacteria	Alteromonadales	Alteromonadaceae	sf_1	8695	AF468296.1	Arctic pack ice; northern Fram Strait; 80 31.1 N; 01 deg 59.7 min E clone ARKIA-34
Proteobacteria	Gammaproteobacteria	Alteromonadales	Alteromonadaceae	sf_1	8732	AY205304.1	new genus YSK-2002
Proteobacteria	Gammaproteobacteria	Alteromonadales	Alteromonadaceae	sf_1	8753	AY553079.1	Idiomarina loihiensis str. GSP37
Proteobacteria	Gammaproteobacteria	Alteromonadales	Alteromonadaceae	sf_1	8863	AF529060.1	Alteromonas marina str. SW-47
Proteobacteria	Gammaproteobacteria	Alteromonadales	Alteromonadaceae	sf_1	8904	AB059263.1	psychrophile deep-sea sediment south-western Pacific isolate str. PS12-4 PS12-4
Proteobacteria	Gammaproteobacteria	Alteromonadales	Alteromonadaceae	sf_1	8916	U91545.1	Shewanella algae str. 43940
Proteobacteria	Gammaproteobacteria	Alteromonadales	Alteromonadaceae	sf_1	8932	AF045560.1	Pseudoalteromonas antarctica str. N-1
Proteobacteria	Gammaproteobacteria	Alteromonadales	Alteromonadaceae	sf_1	8970	AJ295716.1	Arctic seawater isolate str. R9879
Proteobacteria	Gammaproteobacteria	Alteromonadales	Alteromonadaceae	sf_1	8975	AB016268.1	Alteromonas sp. str. NIBH P1M3
Proteobacteria	Gammaproteobacteria	Alteromonadales	Alteromonadaceae	sf_1	8978	AF468393.1	Arctic sea ice ARK10108
Proteobacteria	Gammaproteobacteria	Alteromonadales	Alteromonadaceae	sf_1	9009	AF022402.1	Shewanella sp. ANG.209 str. ANG.strain 209 ANG.209
Proteobacteria	Gammaproteobacteria	Alteromonadales	Alteromonadaceae	sf_1	9019
Proteobacteria	Gammaproteobacteria	Alteromonadales	Alteromonadaceae	sf_1	9035	AB124836.1	Microbulbifer sp. str. JAMB-A94
Proteobacteria	Gammaproteobacteria	Alteromonadales	Alteromonadaceae	sf_1	9058	X82136.1	Pseudoalteromonas carrageenovora str. ATCC 12662T
Proteobacteria	Gammaproteobacteria	Alteromonadales	Alteromonadaceae	sf_1	9067	AF006669.1	Shewanella algae str. ACM 4733
Proteobacteria	Gammaproteobacteria	Alteromonadales	Alteromonadaceae	sf_1	9111	AF539773.1	Pseudoalteromonas sp. str. E36
Proteobacteria	Gammaproteobacteria	Alteromonadales	Alteromonadaceae	sf_1	9143	AJ417594.1	Pseudoalteromonas agarivorans str. KMM 255
Proteobacteria	Gammaproteobacteria	Alteromonadales	Alteromonadaceae	sf_1	9148	AF172988.1	Pseudoalteromonas ulvae str. UL13
Proteobacteria	Gammaproteobacteria	Alteromonadales	Alteromonadaceae	sf_1	9149	AF081498.1	Pseudoalteromonas piscicida str. Cura-d
Proteobacteria	Gammaproteobacteria	Alteromonadales	Alteromonadaceae	sf_1	9203	AY194066.1	Thalassomonas ganghwensis str. JC2041
Proteobacteria	Gammaproteobacteria	Alteromonadales	Alteromonadaceae	sf_1	9205	AF354597.1	marine clone Arctic96B-17
Proteobacteria	Gammaproteobacteria	Alteromonadales	Alteromonadaceae	sf_1	9218	X67024.1	Pseudoalteromonas haloplanktis str. ATCC 14393
Proteobacteria	Gammaproteobacteria	Alteromonadales	Alteromonadaceae	sf_1	9222	X82132.1	Shewanella hanedai str. CIP 103207T
Proteobacteria	Gammaproteobacteria	Alteromonadales	Alteromonadaceae	sf_1	9227
Proteobacteria	Gammaproteobacteria	Alteromonadales	Alteromonadaceae	sf_1	9230	AY165576.1	Antarctic pack ice Lasarev Sea Southern Ocean clone ANTXI/4_14-62 sea
Proteobacteria	Gammaproteobacteria	Alteromonadales	Alteromonadaceae	sf_1	9236	AF114501.1	attached marine recovered surface clone 18 proteobacterium
Proteobacteria	Gammaproteobacteria	Alteromonadales	Alteromonadaceae	sf_1	9239	AF468400.1	Arctic sea ice ARK10228
Proteobacteria	Gammaproteobacteria	Alteromonadales	Alteromonadaceae	sf_1	9247	AF500078.1	Shewanella japonica KMM 3577
Proteobacteria	Gammaproteobacteria	Alteromonadales	Alteromonadaceae	sf_1	9288	AJ295715.1	Alteromonas stellipolaris str. LMG 21861
Proteobacteria	Gammaproteobacteria	Alteromonadales	Alteromonadaceae	sf_1	9292
Proteobacteria	Gammaproteobacteria	Alteromonadales	Alteromonadaceae	sf_1	9324	AF316891.1	Pseudoalteromonas ruthenica str. KMM300
Proteobacteria	Gammaproteobacteria	Alteromonadales	Alteromonadaceae	sf_1	9364	U85855.1	Pseudoalteromonas prydzensis str. MB8-11
Proteobacteria	Gammaproteobacteria	Alteromonadales	Alteromonadaceae	sf_1	9369	X82144.1	Pseudoalteromonas luteoviolacea str. NCIMB 1893T
Proteobacteria	Gammaproteobacteria	Alteromonadales	Alteromonadaceae	sf_1	9380	AY180101.1	Marinobacter excellens str. KMM 3809
Proteobacteria	Gammaproteobacteria	Alteromonadales	Alteromonadaceae	sf_1	9384	AJ132226.1	Moritella viscosa str. NVI 88/478T
Proteobacteria	Gammaproteobacteria	Alteromonadales	Alteromonadaceae	sf_1	9386	AB016267.1	Alteromonas sp. str. NIBH P2M11
Proteobacteria	Gammaproteobacteria	Alteromonadales	Alteromonadaceae	sf_1	9416	AF539786.1	marine isolate str. R8
Proteobacteria	Gammaproteobacteria	Alteromonadales	Alteromonadaceae	sf_1	9442	AY135666.1	Southern Ocean clone ANT18/2_88
Proteobacteria	Gammaproteobacteria	Alteromonadales	Alteromonadaceae	sf_1	9486	AF406617.1	Marine isolate str. GK-2001
Proteobacteria	Gammaproteobacteria	Alteromonadales	Alteromonadaceae	sf_1	9491	AF505729.1	Boston Harbor surface water isolate str. UMB6D UMB6D
Proteobacteria	Gammaproteobacteria	Alteromonadales	Alteromonadaceae	sf_1	9501	AB086226.1	sea water isolate str. BP-PH
Proteobacteria	Gammaproteobacteria	Alteromonadales	Alteromonadaceae	sf_1	9562	AF513941.1	Alteromonadaceae clone PH-B55N
Proteobacteria	Gammaproteobacteria	Alteromonadales	Alteromonadaceae	sf_1	9586	AY190533.1	Shewanella gaetbuli str. TF-27
Proteobacteria	Gammaproteobacteria	Alteromonadales	Alteromonadaceae	sf_1	9640	AY028205.1	exposed to diatom detritus isolate str. Tw-10 Tw-10
Proteobacteria	Gammaproteobacteria	Cardiobacteriales	Cardiobacteriaceae	sf_1	8536	M35014.1	Cardiobacterium hominis
Proteobacteria	Gammaproteobacteria	Cardiobacteriales	Cardiobacteriaceae	sf_1	9453	AF506987.1	Cardiobacterium valvarum str. MDA3079
Proteobacteria	Gammaproteobacteria	Chromatiales	Chromatiaceae	sf_1	8376	AF513942.1	Chromatiaceae clone LA4-B63N
Proteobacteria	Gammaproteobacteria	Chromatiales	Chromatiaceae	sf_1	8408	Y12368.2	Thiorhodovibrio winogradskyi
Proteobacteria	Gammaproteobacteria	Chromatiales	Chromatiaceae	sf_1	8546	AJ242772.1	Thiocapsa litoralis
Proteobacteria	Gammaproteobacteria	Chromatiales	Chromatiaceae	sf_1	8697	AJ401211.1	Thiococcus sp. AT2204
Proteobacteria	Gammaproteobacteria	Chromatiales	Chromatiaceae	sf_1	9048	AJ401209.1	Allochromatium sp. AT2202
Proteobacteria	Gammaproteobacteria	Chromatiales	Chromatiaceae	sf_1	9052
Proteobacteria	Gammaproteobacteria	Chromatiales	Chromatiaceae	sf_1	9370	AB010860.1	isolate str. HTB019
Proteobacteria	Gammaproteobacteria	Chromatiales	Chromatiaceae	sf_1	9571	M96395.1	Nitrosococcus oceanus
Proteobacteria	Gammaproteobacteria	Legionellales	Coxiellaceae	sf_3	7893	AJ252651.1	agricultural soil clone SC-I-71
Proteobacteria	Gammaproteobacteria	Legionellales	Coxiellaceae	sf_3	8457	AJ240918.1	5' clone CHAB-XI-27
Proteobacteria	Gammaproteobacteria	Legionellales	Coxiellaceae	sf_3	8969	AJ536861.1	uranium mining waste pile soil sample clone JG30-KF-C15 proteobacterium
Proteobacteria	Gammaproteobacteria	Legionellales	Coxiellaceae	sf_3	9198	AJ295651.1	uranium mining waste pile clone KF-JG30-B15 KF-JG30-B15
Proteobacteria	Gammaproteobacteria	Legionellales	Coxiellaceae	sf_3	9444	AF523974.1	forested wetland clone FW23
Proteobacteria	Gammaproteobacteria	Chromatiales	Ectothiorhodospiraceae	sf_1	9450	AJ318526.1	Halorhodospira neutrophila str. SG 3304
Proteobacteria	Gammaproteobacteria	Chromatiales	Ectothiorhodospiraceae	sf_1	9598	AF507818.1	Mono Lake at depth 2 m station 6 July 2000 clone ML602J-47 proteobacterium
Proteobacteria	Gammaproteobacteria	Enterobacteriales	Enterobacteriaceae	sf_6	433	AF523903.1	coal effluent wetland clone RCP2-6
Proteobacteria	Gammaproteobacteria	Enterobacteriales	Enterobacteriaceae	sf_6	646	AY695840.1	Opitutus sp. str. SA-9
Proteobacteria	Gammaproteobacteria	Enterobacteriales	Enterobacteriaceae	sf_1	1206	AY265343.1	Dermacentor variabilis symbiont
Proteobacteria	Gammaproteobacteria	Enterobacteriales	Enterobacteriaceae	sf_1	8173	Z76752.1	Photorhabdus asymbiotica str. ATCC 43949
Proteobacteria	Gammaproteobacteria	Enterobacteriales	Enterobacteriaceae	sf_1	8182	X07652.1	Proteus vulgaris str. IFAM 1731
Proteobacteria	Gammaproteobacteria	Enterobacteriales	Enterobacteriaceae	sf_1	8225
Proteobacteria	Gammaproteobacteria	Enterobacteriales	Enterobacteriaceae	sf_1	8236	AF476110.1	Vryburgia amaryllidis symbiont
Proteobacteria	Gammaproteobacteria	Enterobacteriales	Enterobacteriaceae	sf_1	8251	AF214640.1	Nitrogen-fixing isolate str. CANF3
Proteobacteria	Gammaproteobacteria	Enterobacteriales	Enterobacteriaceae	sf_1	8282	AF476101.1	Antonina pretiosa symbiont
Proteobacteria	Gammaproteobacteria	Enterobacteriales	Enterobacteriaceae	sf_1	8283	AF263562.1	Heteropsylla texana symbiont
Proteobacteria	Gammaproteobacteria	Enterobacteriales	Enterobacteriaceae	sf_1	8286	AF476102.1	Cyphonococcus alpinus symbiont
Proteobacteria	Gammaproteobacteria	Enterobacteriales	Enterobacteriaceae	sf_1	8362	AF453251.1	Klebsiella pneumoniae str. ASR1
Proteobacteria	Gammaproteobacteria	Enterobacteriales	Enterobacteriaceae	sf_1	8379	AF289542.1	Erwinia amylovora EA G-5
Proteobacteria	Gammaproteobacteria	Enterobacteriales	Enterobacteriaceae	sf_1	8450	AY043168.1	Morganella morganii
Proteobacteria	Gammaproteobacteria	Enterobacteriales	Enterobacteriaceae	sf_1	8467	AB061685.1	Serratia marcescens subsp. sakuensis str. KRED subsp.
Proteobacteria	Gammaproteobacteria	Enterobacteriales	Enterobacteriaceae	sf_1	8473	M59155.1	Hafnia alvei
Proteobacteria	Gammaproteobacteria	Enterobacteriales	Enterobacteriaceae	sf_1	8504	AF476104.1	Dysmicoccus neobrevipes symbiont
Proteobacteria	Gammaproteobacteria	Enterobacteriales	Enterobacteriaceae	sf_1	8505	AJ233406.1	Buttiauxella warmboldiae str. DSM 9404
Proteobacteria	Gammaproteobacteria	Enterobacteriales	Enterobacteriaceae	sf_1	8510	AJ233420.1	Klebsiella pneumoniae str. DSM 30104
Proteobacteria	Gammaproteobacteria	Enterobacteriales	Enterobacteriaceae	sf_1	8528	Y17665.1	Enterobacter cloacae Nr. 3
Proteobacteria	Gammaproteobacteria	Enterobacteriales	Enterobacteriaceae	sf_1	8529	AF181574.1	Raoultella planticola 7
Proteobacteria	Gammaproteobacteria	Enterobacteriales	Enterobacteriaceae	sf_1	8530	AJ489826.1	Enterobacteriaceae CF01Ent-1
Proteobacteria	Gammaproteobacteria	Enterobacteriales	Enterobacteriaceae	sf_1	8554	AJ627202.1	Kluyvera ascorbata 69
Proteobacteria	Gammaproteobacteria	Enterobacteriales	Enterobacteriaceae	sf_1	8558	U80200.1	Erwinia chrysanthemi str. ATCC 11663
Proteobacteria	Gammaproteobacteria	Enterobacteriales	Enterobacteriaceae	sf_1	8564	X79939.1	Rahnella aquatilis str. ATCC 33989
Proteobacteria	Gammaproteobacteria	Enterobacteriales	Enterobacteriaceae	sf_1	8590	AJ010486.1	Enterobacter pyrinus str. KCTC2520
Proteobacteria	Gammaproteobacteria	Enterobacteriales	Enterobacteriaceae	sf_1	8603	AF476106.1	Melanococcus albizziae symbiont
Proteobacteria	Gammaproteobacteria	Enterobacteriales	Enterobacteriaceae	sf_1	8607	AF476100.1	Amonostherium lichtensioides symbiont
Proteobacteria	Gammaproteobacteria	Enterobacteriales	Enterobacteriaceae	sf_1	8624	AF476105.1	Erium globosum symbiont
Proteobacteria	Gammaproteobacteria	Enterobacteriales	Enterobacteriaceae	sf_1	8627	AF476099.1	Australicoccus grevilleae symbiont
Proteobacteria	Gammaproteobacteria	Enterobacteriales	Enterobacteriaceae	sf_1	8631	AF476108.1	Planococcus ficus symbiont
Proteobacteria	Gammaproteobacteria	Enterobacteriales	Enterobacteriaceae	sf_1	8632	AB018593.1	Selenate-reducing isolate str. TSA
Proteobacteria	Gammaproteobacteria	Enterobacteriales	Enterobacteriaceae	sf_1	8640
Proteobacteria	Gammaproteobacteria	Enterobacteriales	Enterobacteriaceae	sf_1	8642	AF373202.1	Erwinia chrysanthemi str. 580
Proteobacteria	Gammaproteobacteria	Enterobacteriales	Enterobacteriaceae	sf_1	8690	AY223838.1	Serratia marcescens str. ost 3
Proteobacteria	Gammaproteobacteria	Enterobacteriales	Enterobacteriaceae	sf_1	8693	AF130912.1	Pantoea agglomerans str. A40
Proteobacteria	Gammaproteobacteria	Enterobacteriales	Enterobacteriaceae	sf_1	8700	AF489427.1	Baumannia cicadellinicola
Proteobacteria	Gammaproteobacteria	Enterobacteriales	Enterobacteriaceae	sf_1	8711	AJ233432.1	Serratia odorifera str. DSM 4582
Proteobacteria	Gammaproteobacteria	Enterobacteriales	Enterobacteriaceae	sf_1	8712	AJ233434.1	Serratia proteamaculans str. DSM 4543
Proteobacteria	Gammaproteobacteria	Enterobacteriales	Enterobacteriaceae	sf_1	8716	AB033602.1	Pantoea agglomerans
Proteobacteria	Gammaproteobacteria	Enterobacteriales	Enterobacteriaceae	sf_1	8739	AJ233427.1	Serratia entomophila str. DSM 12358
Proteobacteria	Gammaproteobacteria	Enterobacteriales	Enterobacteriaceae	sf_1	8740	AF373201.1	Erwinia chrysanthemi str. 573
Proteobacteria	Gammaproteobacteria	Enterobacteriales	Enterobacteriaceae	sf_1	8742	AF084835.1	USA:New York isolate str. KN4
Proteobacteria	Gammaproteobacteria	Enterobacteriales	Enterobacteriaceae	sf_1	8758	U80201.1	Pectobacterium cypripedii str. ATCC 29267
Proteobacteria	Gammaproteobacteria	Enterobacteriales	Enterobacteriaceae	sf_1	8770
Proteobacteria	Gammaproteobacteria	Enterobacteriales	Enterobacteriaceae	sf_1	8773
Proteobacteria	Gammaproteobacteria	Enterobacteriales	Enterobacteriaceae	sf_6	8783	AF075271.2	Alterococcus agarolyticus str. ADT3; CCRC17102
Proteobacteria	Gammaproteobacteria	Enterobacteriales	Enterobacteriaceae	sf_1	8885	AB089246.1	Morganella morganii str. AP28
Proteobacteria	Gammaproteobacteria	Enterobacteriales	Enterobacteriaceae	sf_1	8886	AF170176.1	Salmonella typhimurium LT2 str. SGSC1412
Proteobacteria	Gammaproteobacteria	Enterobacteriales	Enterobacteriaceae	sf_1	8890	X93216.1	Raoultella planticola str. DR3
Proteobacteria	Gammaproteobacteria	Enterobacteriales	Enterobacteriaceae	sf_1	8892	U93263.1	Aranicola proteolyticus
Proteobacteria	Gammaproteobacteria	Enterobacteriales	Enterobacteriaceae	sf_1	8934	AF373188.1	Pectobacterium subsp. carotovorum str. E155 subsp.
Proteobacteria	Gammaproteobacteria	Enterobacteriales	Enterobacteriaceae	sf_1	8936	AF543283.1	Klebsiella oxytoca str. ChDC OS31
Proteobacteria	Gammaproteobacteria	Enterobacteriales	Enterobacteriaceae	sf_1	9029	AY280573.1	Photorhabdus asymbiotica subsp. australis str. MB
Proteobacteria	Gammaproteobacteria	Enterobacteriales	Enterobacteriaceae	sf_1	9060	AJ853891.1	Enterobacter ludwigii str. EN-119 = DSMZ 16688
Proteobacteria	Gammaproteobacteria	Enterobacteriales	Enterobacteriaceae	sf_1	9082	AJ223469.1	Brenneria quercina str. LMG 2724-T
Proteobacteria	Gammaproteobacteria	Enterobacteriales	Enterobacteriaceae	sf_1	9135	AJ487029.1	intestine Zophobas mori clone
Proteobacteria	Gammaproteobacteria	Enterobacteriales	Enterobacteriaceae	sf_1	9142	AJ233410.1	Erwinia amylovora str. DSM 30165
Proteobacteria	Gammaproteobacteria	Enterobacteriales	Enterobacteriaceae	sf_1	9157	AF293618.1	Secondary symbiont type-U Acyrthosiphon pisum (rrs) clone 5B type-U
Proteobacteria	Gammaproteobacteria	Enterobacteriales	Enterobacteriaceae	sf_1	9202	AF189697.1	Activated sludge isolate str. BC55
Proteobacteria	Gammaproteobacteria	Enterobacteriales	Enterobacteriaceae	sf_1	9252	AF130971.1	Pantoea cedenensis str. A34
Proteobacteria	Gammaproteobacteria	Enterobacteriales	Enterobacteriaceae	sf_1	9262	AJ871363.1	Yersinia aldovae str. A125
Proteobacteria	Gammaproteobacteria	Enterobacteriales	Enterobacteriaceae	sf_1	9264	AJ007405.1	Photorhabdus temperata str. XINach
Proteobacteria	Gammaproteobacteria	Enterobacteriales	Enterobacteriaceae	sf_1	9265	AY253919.1	Rahnella aquatilis k 8
Proteobacteria	Gammaproteobacteria	Enterobacteriales	Enterobacteriaceae	sf_1	9266	Z14096.1	Parasite BEV of E.variegatus
Proteobacteria	Gammaproteobacteria	Enterobacteriales	Enterobacteriaceae	sf_1	9274	AJ550468.1	Enterobacter sp. CC1
Proteobacteria	Gammaproteobacteria	Enterobacteriales	Enterobacteriaceae	sf_1	9276	AJ233422.1	Obesumbacterium proteus str. DSM 2777
Proteobacteria	Gammaproteobacteria	Enterobacteriales	Enterobacteriaceae	sf_1	9290	AF465797.1	Baumannia cicadellinicola
Proteobacteria	Gammaproteobacteria	Enterobacteriales	Enterobacteriaceae	sf_1	9293	AJ245598.1	USA clone 14/7
Proteobacteria	Gammaproteobacteria	Enterobacteriales	Enterobacteriaceae	sf_1	9302	AF373198.1	Pantoea subsp. stewartii str. GSPB 2626
Proteobacteria	Gammaproteobacteria	Enterobacteriales	Enterobacteriaceae	sf_1	9309	AJ417833.1	Buchnera sp
Proteobacteria	Gammaproteobacteria	Enterobacteriales	Enterobacteriaceae	sf_1	9337	U90758.1	Rahnella genosp. 3 str. DSM 30078
Proteobacteria	Gammaproteobacteria	Enterobacteriales	Enterobacteriaceae	sf_1	9345	AF141891.1	Erwinia amylovora str. BC199(=Ea528)
Proteobacteria	Gammaproteobacteria	Enterobacteriales	Enterobacteriaceae	sf_1	9346	AJ414141.1	Yersinia pestis str. CO92
Proteobacteria	Gammaproteobacteria	Enterobacteriales	Enterobacteriaceae	sf_1	9348
Proteobacteria	Gammaproteobacteria	Enterobacteriales	Enterobacteriaceae	sf_1	9358	U92194.1	Salmonella subsp. enterica serovar Waycross str. Swy1 subsp.
Proteobacteria	Gammaproteobacteria	Enterobacteriales	Enterobacteriaceae	sf_1	9361	AB004747.1	Enterobacter intermedius str. JCM1238
Proteobacteria	Gammaproteobacteria	Enterobacteriales	Enterobacteriaceae	sf_1	9363	AF025365.1	Citrobacter freundii str. CDC 621-64
Proteobacteria	Gammaproteobacteria	Enterobacteriales	Enterobacteriaceae	sf_1	9368	AJ233424.1	Pragia fontium str. DSM 5563
Proteobacteria	Gammaproteobacteria	Enterobacteriales	Enterobacteriaceae	sf_1	9385	AY264673.1	Australiococcus greville symbiont
Proteobacteria	Gammaproteobacteria	Enterobacteriales	Enterobacteriaceae	sf_1	9390	Z96077.1	Enterobacter nimipressuralis str. LMG 10245-T
Proteobacteria	Gammaproteobacteria	Enterobacteriales	Enterobacteriaceae	sf_1	9391
Proteobacteria	Gammaproteobacteria	Enterobacteriales	Enterobacteriaceae	sf_1	9417	AJ233429.1	Serratia fonticola str. DSM 4576
Proteobacteria	Gammaproteobacteria	Enterobacteriales	Enterobacteriaceae	sf_1	9420
Proteobacteria	Gammaproteobacteria	Enterobacteriales	Enterobacteriaceae	sf_1	9496
Proteobacteria	Gammaproteobacteria	Enterobacteriales	Enterobacteriaceae	sf_1	9594	AB089244.1	Morganella morganii str. ATCC35200
Proteobacteria	Gammaproteobacteria	Enterobacteriales	Enterobacteriaceae	sf_1	9651	AF373176.1	Pectobacterium subsp. atrosepticum str. GSPB 1710
Proteobacteria	Gammaproteobacteria	Thiotrichales	Francisellaceae	sf_1	9554	AF206675.1	Tilapia parasite TPT-541
Proteobacteria	Gammaproteobacteria	Oceanospirillales	Halomonadaceae	sf_1	8317	AF211861.1	Chromohalobacter canadensis str. DSM6769
Proteobacteria	Gammaproteobacteria	Oceanospirillales	Halomonadaceae	sf_1	8514	AJ295144.1	Chromohalobacter israelensis str. ATCC 43985 T
Proteobacteria	Gammaproteobacteria	Oceanospirillales	Halomonadaceae	sf_1	8562	AB085649.1	Halomonas sp. str. TNB I20
Proteobacteria	Gammaproteobacteria	Oceanospirillales	Halomonadaceae	sf_1	8576	AF550586.1	Halomonas sp. Ko502
Proteobacteria	Gammaproteobacteria	Oceanospirillales	Halomonadaceae	sf_1	8598	X92417.1	Halomonas desiderata str. FB2
Proteobacteria	Gammaproteobacteria	Oceanospirillales	Halomonadaceae	sf_1	8854	AY167282.1	Halomonas variabilis str. ANT9112
Proteobacteria	Gammaproteobacteria	Legionellales	Legionellaceae	sf_1	8193	Z49731.1	Legionella parisiensis
Proteobacteria	Gammaproteobacteria	Legionellales	Legionellaceae	sf_1	8865	AF468229.1	Arctic pack ice; northern Fram Strait; 80 31.1 N; 01 deg 59.7 min E clone ARKCH2Br2-23
Proteobacteria	Gammaproteobacteria	Methylococcales	Methylococcaceae	sf_1	8243	AF521582.1	isolate str. IR
Proteobacteria	Gammaproteobacteria	Methylococcales	Methylococcaceae	sf_1	8645	AF307138.1	Methylomicrobium buryatense str. 5B
Proteobacteria	Gammaproteobacteria	Methylococcales	Methylococcaceae	sf_1	9065	AY094499.1	extracted chamber connected to Ocean Drilling Program site 892b clone 1-27 proteobacterium
Proteobacteria	Gammaproteobacteria	Methylococcales	Methylococcaceae	sf_1	9438	AJ535221.1	marine sediment above hydrate ridge clone Hyd24-01 proteobacterium
Proteobacteria	Gammaproteobacteria	Pseudomonadales	Moraxellaceae	sf_3	8366	AJ609556.1	Psychrobacter frigidicola str. DSM 12411
Proteobacteria	Gammaproteobacteria	Pseudomonadales	Moraxellaceae	sf_3	8565	Z93454.1	Acinetobacter sp. str. 942 Group BJ17
Proteobacteria	Gammaproteobacteria	Pseudomonadales	Moraxellaceae	sf_3	8604	AB087260.2	Moraxella oblonga str. IAM 14971
Proteobacteria	Gammaproteobacteria	Pseudomonadales	Moraxellaceae	sf_3	8727	AY251390.1	Alkanindiges hongkongensis str. HKU9
Proteobacteria	Gammaproteobacteria	Pseudomonadales	Moraxellaceae	sf_3	8838	AJ748267.1	Psychrobacter psychrophilus CMS 28
Proteobacteria	Gammaproteobacteria	Pseudomonadales	Moraxellaceae	sf_3	9359	AB101444.1	Acinetobacter junii str. S33
Proteobacteria	Gammaproteobacteria	Pseudomonadales	Moraxellaceae	sf_3	9428	AF143841.1	hydrocarbon-degrading consortium clone AF2-1D
Proteobacteria	Gammaproteobacteria	Pseudomonadales	Moraxellaceae	sf_3	9447	AY043369.1	Acinetobacter sp. str. AU1523
Proteobacteria	Gammaproteobacteria	Pseudomonadales	Moraxellaceae	sf_3	9466	AF509830.1	Acinetobacter tandoii str. 4N13
Proteobacteria	Gammaproteobacteria	Pseudomonadales	Moraxellaceae	sf_3	9641	X81662.1	Acinetobacter haemolyticus
Proteobacteria	Gammaproteobacteria	Oceanospirillales	Oceanospirillaceae	sf_1	8653	AF382127.1	bacterioplankton clone ZA3706c
Proteobacteria	Gammaproteobacteria	Oceanospirillales	Oceanospirillaceae	sf_1	9351	AF382102.1	bacterioplankton clone ZA2333c
Proteobacteria	Gammaproteobacteria	Pasteurellales	Pasteurellaceae	sf_1	8195	NZ_AADP01000001.1	Haemophilus influenzae str. R2866
Proteobacteria	Gammaproteobacteria	Pasteurellales	Pasteurellaceae	sf_1	8228	AF268964.1	Actinobacillus indolicus str. H1419
Proteobacteria	Gammaproteobacteria	Pasteurellales	Pasteurellaceae	sf_1	8409	AF499896.1	human colonic mucosal biopsy clone ABLCf1
Proteobacteria	Gammaproteobacteria	Pasteurellales	Pasteurellaceae	sf_1	8432
Proteobacteria	Gammaproteobacteria	Pasteurellales	Pasteurellaceae	sf_1	8555	AY613451.1	Haemophilus influenzae str. M9741
Proteobacteria	Gammaproteobacteria	Pasteurellales	Pasteurellaceae	sf_1	8614	AF359941.1	Acidithiobacillus thiooxidans str. KCTC 8928P
Proteobacteria	Gammaproteobacteria	Pasteurellales	Pasteurellaceae	sf_1	8848	AF227858.1	str. 86355
Proteobacteria	Gammaproteobacteria	Pasteurellales	Pasteurellaceae	sf_1	8861	AB004031.1	Haemophilus parasuis 427
Proteobacteria	Gammaproteobacteria	Pasteurellales	Pasteurellaceae	sf_1	8876	AF053894.1	Mannheimia sp. R19.2 str. R19.2; CCUG 38463 R19.2
Proteobacteria	Gammaproteobacteria	Pasteurellales	Pasteurellaceae	sf_1	8952	M75068.1	Actinobacillus lignieresii
Proteobacteria	Gammaproteobacteria	Pasteurellales	Pasteurellaceae	sf_1	9237
Proteobacteria	Gammaproteobacteria	Pasteurellales	Pasteurellaceae	sf_1	9263	M75067.1	Actinobacillus capsulatus
Proteobacteria	Gammaproteobacteria	Pasteurellales	Pasteurellaceae	sf_1	9349	AF227861.1	Pasteurella sp. str. 91985
Proteobacteria	Gammaproteobacteria	Pasteurellales	Pasteurellaceae	sf_1	9360	AF224297.1	Pasteurella multocida subsp. gallicida str. MCCM 00021 subsp.
Proteobacteria	Gammaproteobacteria	Pasteurellales	Pasteurellaceae	sf_1	9628	AF549390.1	Histophilus somni str. CCUG 12839
Proteobacteria	Gammaproteobacteria	Thiotrichales	Piscirickettsiaceae	sf_3	8664	AJ237758.1	Thiomicrospira sp. str. Milos-T2
Proteobacteria	Gammaproteobacteria	Thiotrichales	Piscirickettsiaceae	sf_3	9027	AF064545.1	Thiomicrospira crunogena str. XCL-2
Proteobacteria	Gammaproteobacteria	Thiotrichales	Piscirickettsiaceae	sf_3	9291	AF384373.1	Methylophaga alcalica str. M39
Proteobacteria	Gammaproteobacteria	Thiotrichales	Piscirickettsiaceae	sf_3	9392	AJ244761.1	Methylophaga sp. str. V4.ME.29 = MM_2343
Proteobacteria	Gammaproteobacteria	Thiotrichales	Piscirickettsiaceae	sf_3	9557	AF449225.1	Riftia pachyptila's tube clone R76-B23
Proteobacteria	Gammaproteobacteria	Alteromonadales	Pseudoalteromonadaceae	sf_1	9339	AF284230.1	Pseudoalteromonas sp. str. 05
Proteobacteria	Gammaproteobacteria	Alteromonadales	Pseudoalteromonadaceae	sf_1	9627	AF218245.1	Pseudoalteromonas sp
Proteobacteria	Gammaproteobacteria	Pseudomonadales	Pseudomonadaceae	sf_1	8209	AJ518787.1	uranium mining waste pile clone JG37-AG-122 proteobacterium
Proteobacteria	Gammaproteobacteria	Pseudomonadales	Pseudomonadaceae	sf_1	8338	AF267911.1	Pseudomonas synxantha str. DSM 13080 G
Proteobacteria	Gammaproteobacteria	Pseudomonadales	Pseudomonadaceae	sf_1	8344	AF425998.1	Anabaena circinalis AWQC118C isolate str. UNSW3
Proteobacteria	Gammaproteobacteria	Pseudomonadales	Pseudomonadaceae	sf_1	8433	AB001441.1	Pseudomonas syringae pv. broussonetiae str. KOZ 8101 pv.
Proteobacteria	Gammaproteobacteria	Pseudomonadales	Pseudomonadaceae	sf_1	8474	AJ534672.1	ground water deep-well injection disposal site radioactive wastes Tomsk-7 clone S15A-MN7 proteobacterium
Proteobacteria	Gammaproteobacteria	Pseudomonadales	Pseudomonadaceae	sf_1	8508	AF530073.1	Pseudomonas citronellolis str. TERIDB26
Proteobacteria	Gammaproteobacteria	Pseudomonadales	Pseudomonadaceae	sf_1	8513	AF064458.1	Pseudomonas monteilii str. CIP 104883
Proteobacteria	Gammaproteobacteria	Pseudomonadales	Pseudomonadaceae	sf_1	8553	AB046997.1	Pseudomonas fulva str. IAM 1587
Proteobacteria	Gammaproteobacteria	Pseudomonadales	Pseudomonadaceae	sf_1	8561	AF332541.1	Pseudomonas sp. B65
Proteobacteria	Gammaproteobacteria	Pseudomonadales	Pseudomonadaceae	sf_1	8601	AB021401.1	Pseudomonas marginalis str. ATCC 10844T
Proteobacteria	Gammaproteobacteria	Pseudomonadales	Pseudomonadaceae	sf_1	8685	AF448514.1	Cellvibrio fulvus str. NCIMB 8634
Proteobacteria	Gammaproteobacteria	Pseudomonadales	Pseudomonadaceae	sf_1	8687	AF094738.1	Pseudomonas putida str. ATCC 17472
Proteobacteria	Gammaproteobacteria	Pseudomonadales	Pseudomonadaceae	sf_1	8691	AE004501.1	Pseudomonas aeruginosa str. PAO1
Proteobacteria	Gammaproteobacteria	Pseudomonadales	Pseudomonadaceae	sf_1	8708
Proteobacteria	Gammaproteobacteria	Pseudomonadales	Pseudomonadaceae	sf_1	8725	AJ419674.1	Pseudomonas sp. str. 2N1-1
Proteobacteria	Gammaproteobacteria	Pseudomonadales	Pseudomonadaceae	sf_1	8755	AJ288146.1	Pseudomonas sp. SK-1-3-1
Proteobacteria	Gammaproteobacteria	Pseudomonadales	Pseudomonadaceae	sf_1	8777	AB095005.1	Pseudomonas sp. str. KNA6-5
Proteobacteria	Gammaproteobacteria	Pseudomonadales	Pseudomonadaceae	sf_1	8813	AY150184.1	Lyrodus pedicellatus symbiont
Proteobacteria	Gammaproteobacteria	Pseudomonadales	Pseudomonadaceae	sf_1	8852	AF063219.1	Pseudomonas stutzeri str. KC
Proteobacteria	Gammaproteobacteria	Pseudomonadales	Pseudomonadaceae	sf_1	9028	AF468452.1	Pseudomonas koreensis str. Ps 9-14
Proteobacteria	Gammaproteobacteria	Pseudomonadales	Pseudomonadaceae	sf_1	9049	AJ296559.1	uranium mining mill tailing clone GR-Sh2-34 GR-Sh2-34
Proteobacteria	Gammaproteobacteria	Pseudomonadales	Pseudomonadaceae	sf_1	9056	AB037546.1	Pseudomonas aeruginosa str. #47
Proteobacteria	Gammaproteobacteria	Pseudomonadales	Pseudomonadaceae	sf_1	9068	AF143245.1	Pseudomonas stutzeri str. A1501
Proteobacteria	Gammaproteobacteria	Pseudomonadales	Pseudomonadaceae	sf_1	9172	AB041885.1	Pseudomonas psychrophila str. E-3
Proteobacteria	Gammaproteobacteria	Pseudomonadales	Pseudomonadaceae	sf_1	9175	AF405328.1	Pseudomonas extremorientalis str. KMM3447
Proteobacteria	Gammaproteobacteria	Pseudomonadales	Pseudomonadaceae	sf_1	9219	AF181576.1	Pseudomonas cf. monteilii 9
Proteobacteria	Gammaproteobacteria	Pseudomonadales	Pseudomonadaceae	sf_1	9221	AJ492830.1	Pseudomonas fulgida str. DSM 14938 = LMG 2146 P 515/12
Proteobacteria	Gammaproteobacteria	Pseudomonadales	Pseudomonadaceae	sf_1	9238
Proteobacteria	Gammaproteobacteria	Pseudomonadales	Pseudomonadaceae	sf_1	9240	AJ278812.1	Pseudomonas fluorescens str. CHA0
Proteobacteria	Gammaproteobacteria	Pseudomonadales	Pseudomonadaceae	sf_1	9267	AB001450.1	Pseudomonas syringae pv. theae str. PT1
Proteobacteria	Gammaproteobacteria	Pseudomonadales	Pseudomonadaceae	sf_1	9295
Proteobacteria	Gammaproteobacteria	Pseudomonadales	Pseudomonadaceae	sf_1	9300	AY150183.1	Lyrodus pedicellatus symbiont
Proteobacteria	Gammaproteobacteria	Pseudomonadales	Pseudomonadaceae	sf_1	9310	AJ519791.1	Pseudomonas sp. str. AC-167
Proteobacteria	Gammaproteobacteria	Pseudomonadales	Pseudomonadaceae	sf_1	9366	AJ293826.1	Arctic seawater isolate str. R7366
Proteobacteria	Gammaproteobacteria	Pseudomonadales	Pseudomonadaceae	sf_1	9469	AF290486.1	cf. Pseudomonas sp. clone Llangefni 52
Proteobacteria	Gammaproteobacteria	Pseudomonadales	Pseudomonadaceae	sf_1	9493	AF430125.1	Pseudomonas sp. str. dcm7B
Proteobacteria	Gammaproteobacteria	Pseudomonadales	Pseudomonadaceae	sf_1	9613	U01916.1	Pseudomonas flavescens str. B62
Proteobacteria	Gammaproteobacteria	Oceanospirillales	Saccharospirillaceae	sf_1	8889	AF452603.1	hypersaline Mono Lake clone ML110J-5
Proteobacteria	Gammaproteobacteria	Alteromonadales	Shewanellaceae	sf_1	8201	AB094597.1	Shewanella surugaensis str. c959
Proteobacteria	Gammaproteobacteria	Alteromonadales	Shewanellaceae	sf_1	8581	AB008796.1	Shewanella benthica str. DB21MT-2
Proteobacteria	Gammaproteobacteria	Alteromonadales	Shewanellaceae	sf_1	8641	AJ252022.1	Moritella abyssi str. 2693
Proteobacteria	Gammaproteobacteria	Alteromonadales	Shewanellaceae	sf_1	8662
Proteobacteria	Gammaproteobacteria	Alteromonadales	Shewanellaceae	sf_1	9081	AB059264.1	Shewanella sp. str. MTW-1
Proteobacteria	Gammaproteobacteria	Aeromonadales	Succinivibrionaceae	sf_1	8822	AF497809.1	Anaerobiospirillum sp. str. 3J102
Proteobacteria	Gammaproteobacteria	Thiotrichales	Thiotrichaceae	sf_3	8321	AF532769.1	Wadden Sea sediment clone Dangast A9
Proteobacteria	Gammaproteobacteria	Thiotrichales	Thiotrichaceae	sf_3	8477	AF532774.1	marine sediment clone Limfjorden L8
Proteobacteria	Gammaproteobacteria	Thiotrichales	Thiotrichaceae	sf_3	8559	L40998.1	Thioploca ingrica
Proteobacteria	Gammaproteobacteria	Thiotrichales	Thiotrichaceae	sf_3	8703	AF110275.1	Beggiatoa sp. str. AA5A
Proteobacteria	Gammaproteobacteria	Thiotrichales	Thiotrichaceae	sf_3	8741	AF532771.1	marine sediment clone Limfjorden L10
Proteobacteria	Gammaproteobacteria	Thiotrichales	Thiotrichaceae	sf_3	8752	AF110276.1	Beggiatoa sp. str. MS-81-1c
Proteobacteria	Gammaproteobacteria	Thiotrichales	Thiotrichaceae	sf_3	9015	AF110274.1	Beggiatoa alba str. B18LD; ATCC 33555
Proteobacteria	Gammaproteobacteria	Thiotrichales	Thiotrichaceae	sf_3	9321	AB108786.1	marine sediment clone Tokyo Bay D
Proteobacteria	Gammaproteobacteria	Oceanospirillales	Unclassified	sf_3	8230
Proteobacteria	Gammaproteobacteria	uranium waste clones	Unclassified	sf_1	8231	AJ536870.1	uranium waste soil clone JG30a-KF-21
Proteobacteria	Gammaproteobacteria	Unclassified	Unclassified	sf_3	8245
Proteobacteria	Gammaproteobacteria	Thiotrichales	Unclassified	sf_1	8323	AF420363.1	hydrothermal sediment clone AF420363
Proteobacteria	Gammaproteobacteria	Oceanospirillales	Unclassified	sf_3	8327	AF468398.1	Arctic sea ice ARK10148
Proteobacteria	Gammaproteobacteria	Unclassified	Unclassified	sf_3	8339	AY212729.1	water 5 m downstream manure clone 35ds5
Proteobacteria	Gammaproteobacteria	Symbionts	Unclassified	sf_1	8403	AF432146.1	Selenate-reducing isolate str. KE4OH1
Proteobacteria	Gammaproteobacteria	Enterobacteriales	Unclassified	sf_1	8430	AF029226.1	Salmonella bongori str. JEO 4162
Proteobacteria	Gammaproteobacteria	Alteromonadales	Unclassified	sf_1	8483	AJ002006.1	Rheinheimera baltica str. OS140 Baltic # 166
Proteobacteria	Gammaproteobacteria	Unclassified	Unclassified	sf_3	8522
Proteobacteria	Gammaproteobacteria	Ellin307/WD2124	Unclassified	sf_1	8532
Proteobacteria	Gammaproteobacteria	Unclassified	Unclassified	sf_3	8560
Proteobacteria	Gammaproteobacteria	Legionellales	Unclassified	sf_3	8587	AF526927.2	Mars Odyssey Orbiter and encapsulation facility clone T5-3
Proteobacteria	Gammaproteobacteria	SUP05	Unclassified	sf_1	8605	AF382104.1	bacterioplankton clone ZA2525c
Proteobacteria	Gammaproteobacteria	Unclassified	Unclassified	sf_3	8606
Proteobacteria	Gammaproteobacteria	Unclassified	Unclassified	sf_3	8646
Proteobacteria	Gammaproteobacteria	SUP05	Unclassified	sf_1	8654	AB099939.1	inactive deep-sea hydrothermal vent chimneys clone IheB2-31
Proteobacteria	Gammaproteobacteria	Unclassified	Unclassified	sf_3	8714	AB021372.1	Marinobacter hydrocarbonoclasticus str. ATCC 27132T
Proteobacteria	Gammaproteobacteria	uranium waste clones	Unclassified	sf_1	8747	AJ536882.1	uranium waste soil clone JG30-KF-CM35
Proteobacteria	Gammaproteobacteria	Unclassified	Unclassified	sf_4	8855
Proteobacteria	Gammaproteobacteria	Unclassified	Unclassified	sf_3	8926	AB099937.1	inactive deep-sea hydrothermal vent chimneys clone IheB2-13
Proteobacteria	Gammaproteobacteria	SUP05	Unclassified	sf_1	8953	AF354606.1	marine clone Arctic96BD-19
Proteobacteria	Gammaproteobacteria	aquatic clone group	Unclassified	sf_1	8957	AF354614.1	marine clone Arctic97C-5
Proteobacteria	Gammaproteobacteria	Unclassified	Unclassified	sf_3	8959	AF406527.1	bacterioplankton clone AEGEAN_133
Proteobacteria	Gammaproteobacteria	Oceanospirillales	Unclassified	sf_3	8961	M99446.1	Calyptogena magnifica symbiont
Proteobacteria	Gammaproteobacteria	SAR86	Unclassified	sf_1	8962	AF406526.1	bacterioplankton clone AEGEAN_234
Proteobacteria	Gammaproteobacteria	SUP05	Unclassified	sf_1	8965	M99445.1	Bathymodiolus thermophilus gill symbiont
Proteobacteria	Gammaproteobacteria	GAO cluster	Unclassified	sf_1	8980	AY098909.1	activated sludge clone SBRL2_19
Proteobacteria	Gammaproteobacteria	GAO cluster	Unclassified	sf_1	9008	AF361092.1	activated sludge clone SBRQ157
Proteobacteria	Gammaproteobacteria	Unclassified	Unclassified	sf_3	9044	AF420370.1	hydrothermal sediment clone AF420370
Proteobacteria	Gammaproteobacteria	GAO cluster	Unclassified	sf_1	9059	AF361096.1	activated sludge clone SBRH10
Proteobacteria	Gammaproteobacteria	Unclassified	Unclassified	sf_3	9105
Proteobacteria	Gammaproteobacteria	Unclassified	Unclassified	sf_3	9124	AY145601.1	10e-6 dilution marine samples Weser estuary clone DC8-80-1 proteobacterium
Proteobacteria	Gammaproteobacteria	Symbionts	Unclassified	sf_1	9128	X95229.1	Lucina nassula gill symbiont
Proteobacteria	Gammaproteobacteria	aquatic clone group	Unclassified	sf_1	9246	AY221036.1	Mammoth Cave sediment clone CCD24
Proteobacteria	Gammaproteobacteria	Unclassified	Unclassified	sf_3	9279
Proteobacteria	Gammaproteobacteria	Chromatiales	Unclassified	sf_1	9282
Proteobacteria	Gammaproteobacteria	Shewanella	Unclassified	sf_1	9344	AF005249.1	Shewanella algae str. ATCC 51192
Proteobacteria	Gammaproteobacteria	Unclassified	Unclassified	sf_3	9367	AF387348.1	USA: Pacific Ocean seawater Naha Vents Hawaii isolate str. PV-4
Proteobacteria	Gammaproteobacteria	Unclassified	Unclassified	sf_3	9394
Proteobacteria	Gammaproteobacteria	Legionellales	Unclassified	sf_1	9418	AJ518784.1	uranium mining waste pile clone JG37-AG-14 proteobacterium
Proteobacteria	Gammaproteobacteria	Ellin307/WD2124	Unclassified	sf_1	9458	AJ518786.1	uranium mining waste pile clone JG37-AG-94 proteobacterium
Proteobacteria	Gammaproteobacteria	GAO cluster	Unclassified	sf_1	9468	AY098900.1	activated sludge clone SBRL2_40
Proteobacteria	Gammaproteobacteria	Unclassified	Unclassified	sf_3	9473	AF468261.1	Arctic pack ice; northern Fram Strait; 80 31.1 N; 01 deg 59.7 min E clone ARKDMS-58
Proteobacteria	Gammaproteobacteria	Unclassified	Unclassified	sf_3	9498
Proteobacteria	Gammaproteobacteria	Symbionts	Unclassified	sf_1	9556	AY129087.1	Seepiophila jonesi symbiont
Proteobacteria	Gammaproteobacteria	Unclassified	Unclassified	sf_3	9568	AF523888.1	forested wetland clone RCP2-96
Proteobacteria	Gammaproteobacteria	Unclassified	Unclassified	sf_3	9582
Proteobacteria	Gammaproteobacteria	Vibrionales	Vibrionaceae	sf_1	8223	AY911392.1	Vibrio shilonii str. MP-3
Proteobacteria	Gammaproteobacteria	Vibrionales	Vibrionaceae	sf_1	8267	AJ491290.1	Vibrio pomeroyi str. LMG 20537
Proteobacteria	Gammaproteobacteria	Vibrionales	Vibrionaceae	sf_1	8665	AY257975.1	Vibrio gallicus str. CIP 107867; HT 3-3
Proteobacteria	Gammaproteobacteria	Vibrionales	Vibrionaceae	sf_1	8707	AF513465.1	Vibrio sp. str. PH19
Proteobacteria	Gammaproteobacteria	Vibrionales	Vibrionaceae	sf_1	8723	AF118021.1	Vibrio calviensis str. RE35F/12
Proteobacteria	Gammaproteobacteria	Vibrionales	Vibrionaceae	sf_1	8798	AF172840.1	Vibrio aestuarianus str. KT0901
Proteobacteria	Gammaproteobacteria	Vibrionales	Vibrionaceae	sf_1	8887	X74699.1	Salinivibrio costicola str. ATCC 35508T
Proteobacteria	Gammaproteobacteria	Vibrionales	Vibrionaceae	sf_1	8888	AJ845014.1	Vibrio aestuarianus str. 01/151
Proteobacteria	Gammaproteobacteria	Vibrionales	Vibrionaceae	sf_1	8999	AY292944.1	Photobacterium leiognathi str. LN101
Proteobacteria	Gammaproteobacteria	Vibrionales	Vibrionaceae	sf_1	9223	AY245191.1	Vibrio parahaemolyticus 22
Proteobacteria	Gammaproteobacteria	Vibrionales	Vibrionaceae	sf_1	9525
Proteobacteria	Gammaproteobacteria	Xanthomonadales	Xanthomonadaceae	sf_3	8577	AF442743.1	Xanthomonas axonopodis pv. citri str. MA
Proteobacteria	Gammaproteobacteria	Xanthomonadales	Xanthomonadaceae	sf_3	8689	AB110496.1	Dyemonas todaii str. XD10
Proteobacteria	Gammaproteobacteria	Xanthomonadales	Xanthomonadaceae	sf_3	8983	AF012541.1	Iron oxidising strain ES-1
Proteobacteria	Gammaproteobacteria	Xanthomonadales	Xanthomonadaceae	sf_3	9270	AJ293463.1	Stenotrophomonas rhizophila str. e-p10
Proteobacteria	Gammaproteobacteria	Xanthomonadales	Xanthomonadaceae	sf_3	9277	AY188327.1	penguin droppings sediment clone KD8-68
Proteobacteria	Gammaproteobacteria	Xanthomonadales	Xanthomonadaceae	sf_3	9286	AJ131912.1	Stenotrophomonas maltophilia str. LMG 11104
Proteobacteria	Gammaproteobacteria	Xanthomonadales	Xanthomonadaceae	sf_3	9332	AY096032.1	wetland ecosystem constructed to remediate mine drainage isolate str. WJ2 WJ2
Proteobacteria	Unclassified	Unclassified	Unclassified	sf_20	2520
Proteobacteria	Unclassified	Unclassified	Unclassified	sf_20	6763
Proteobacteria	Unclassified	Unclassified	Unclassified	sf_17	7819
Proteobacteria	Unclassified	Unclassified	Unclassified	sf_8	8247
Proteobacteria	Unclassified	Unclassified	Unclassified	sf_21	8509
Proteobacteria	Unclassified	Unclassified	Unclassified	sf_8	9558
Proteobacteria	Unclassified	Unclassified	Unclassified	sf_28	10091
SPAM	Unclassified	Unclassified	Unclassified	sf_1	705	AJ519639.1	uranium tailings soil clone Sh765B-AG-45
SPAM	Unclassified	Unclassified	Unclassified	sf_1	738	AJ532725.1	uranium mining waste clone JG34-KF-252
Spirochaetes	Spirochaetes	Spirochaetales	Leptospiraceae	sf_3	6470	AY082470.1	neutral pH mine biofilm clone 44a-B1-48
Spirochaetes	Spirochaetes	Spirochaetales	Leptospiraceae	sf_3	6496	NC_005823.1	Leptospira interrogans serovar Copenhageni str. Fiocruz L1-130
Spirochaetes	Spirochaetes	Spirochaetales	Spirochaetaceae	sf_1	6458	AB084961.1	termite gut clone NkS34
Spirochaetes	Spirochaetes	Spirochaetales	Spirochaetaceae	sf_1	6459	AJ431240.1	Spirochaeta sp. str. BHI80-158
Spirochaetes	Spirochaetes	Spirochaetales	Spirochaetaceae	sf_1	6460	AB088907.1	termite gut homogenate clone Rs-B69 sp.
Spirochaetes	Spirochaetes	Spirochaetales	Spirochaetaceae	sf_1	6473	AB088891.1	termite gut homogenate clone Rs-B29 sp.
Spirochaetes	Spirochaetes	Spirochaetales	Spirochaetaceae	sf_1	6476	AB084965.1	termite gut clone NkS50
Spirochaetes	Spirochaetes	Spirochaetales	Spirochaetaceae	sf_1	6477	AJ458945.1	Mixotricha paradoxa is flagellate hindgut Mastotermes darwiniensis clone mp3 of
Spirochaetes	Spirochaetes	Spirochaetales	Spirochaetaceae	sf_1	6479	Y08893.1	Treponema sp
Spirochaetes	Spirochaetes	Spirochaetales	Spirochaetaceae	sf_1	6487	AB088866.1	termite gut homogenate clone Rs-D52 sp.
Spirochaetes	Spirochaetes	Spirochaetales	Spirochaetaceae	sf_1	6488	AF093251.1	Treponema primitia str. ZAS-1
Spirochaetes	Spirochaetes	Spirochaetales	Spirochaetaceae	sf_1	6489	AJ458944.1	Mixotricha paradoxa is flagellate hindgut Mastotermes darwiniensis clone mp1 of
Spirochaetes	Spirochaetes	Spirochaetales	Spirochaetaceae	sf_1	6490	AB062823.1	termite gut homogenate clone BCf4-14
Spirochaetes	Spirochaetes	Spirochaetales	Spirochaetaceae	sf_1	6491	AB062840.1	termite gut homogenate clone BCf8-03
Spirochaetes	Spirochaetes	Spirochaetales	Spirochaetaceae	sf_2	6493	U42284.1	Borrelia anserina str. ES-1
Spirochaetes	Spirochaetes	Spirochaetales	Spirochaetaceae	sf_1	6494	AB088890.1	termite gut homogenate clone Rs-C47 sp.
Spirochaetes	Spirochaetes	Spirochaetales	Spirochaetaceae	sf_1	6502	AF139203.1	Treponema denticola str. ATCC35405
Spirochaetes	Spirochaetes	Spirochaetales	Spirochaetaceae	sf_1	6506	AB088911.1	termite gut homogenate clone Rs-J58 sp.
Spirochaetes	Spirochaetes	Spirochaetales	Spirochaetaceae	sf_1	6507	AB085161.1	termite gut clone NkS-Ste2
Spirochaetes	Spirochaetes	Spirochaetales	Spirochaetaceae	sf_1	6508	X89050.1	termite hindgut clone mpsp2
Spirochaetes	Spirochaetes	Spirochaetales	Spirochaetaceae	sf_3	6514	AB088897.1	termite gut homogenate clone Rs-B68 sp.
Spirochaetes	Spirochaetes	Spirochaetales	Spirochaetaceae	sf_1	6523	AB088912.1	termite gut homogenate clone Rs-J64 sp.
Spirochaetes	Spirochaetes	Spirochaetales	Spirochaetaceae	sf_1	6526	AY230217.1	Treponema sp. str. 7CPL208
Spirochaetes	Spirochaetes	Spirochaetales	Spirochaetaceae	sf_1	6529	AB062806.1	termite gut homogenate clone BCf10-21
Spirochaetes	Spirochaetes	Spirochaetales	Spirochaetaceae	sf_1	6532	AB084963.1	termite gut clone NkS39
Spirochaetes	Spirochaetes	Spirochaetales	Spirochaetaceae	sf_1	6547	AF507855.1	Mono Lake at depth 23 m station 6 July 2000 clone ML623J-23 bacterium
Spirochaetes	Spirochaetes	Spirochaetales	Spirochaetaceae	sf_1	6549	AF523927.1	forested wetland clone RCP1-64
Spirochaetes	Spirochaetes	Spirochaetales	Spirochaetaceae	sf_1	6554	AB088889.1	termite gut homogenate clone Rs-A43 sp.
Spirochaetes	Spirochaetes	Spirochaetales	Spirochaetaceae	sf_1	6557	AF454308.1	spirochete clone ML320J-13
Spirochaetes	Spirochaetes	Spirochaetales	Spirochaetaceae	sf_3	6558	AF166259.1	Spironema culicis str. BR91
Spirochaetes	Spirochaetes	Spirochaetales	Spirochaetaceae	sf_1	6560
Spirochaetes	Spirochaetes	Spirochaetales	Spirochaetaceae	sf_1	6562	AF523928.1	forested wetland clone RCP1-96
Spirochaetes	Spirochaetes	Spirochaetales	Spirochaetaceae	sf_1	6565	AB085166.1	termite gut clone NkS-Oxy25
Spirochaetes	Spirochaetes	Spirochaetales	Spirochaetaceae	sf_1	6567	AB088859.2	termite gut homogenate clone Rs-A48 sp.
Spirochaetes	Spirochaetes	Spirochaetales	Spirochaetaceae	sf_1	6568	AJ419821.1	Spirochaeta sp
Spirochaetes	Spirochaetes	Spirochaetales	Spirochaetaceae	sf_1	6571	AJ458946.1	Mixotricha paradoxa is flagellate hindgut Mastotermes darwiniensis clone mp4 of
Spirochaetes	Spirochaetes	Spirochaetales	Spirochaetaceae	sf_1	6573	AB084955.1	termite gut clone NkS7
Spirochaetes	Spirochaetes	Spirochaetales	Spirochaetaceae	sf_1	6579	AB084968.1	termite gut clone NkS83
Spirochaetes	Spirochaetes	Spirochaetales	Spirochaetaceae	sf_1	6580	AF056341.1	Treponema sp. str. III:C:BA213
Spirochaetes	Spirochaetes	Spirochaetales	Spirochaetaceae	sf_1	6583	AB088875.1	termite gut homogenate clone Rs-J42 sp.
Spirochaetes	Spirochaetes	Spirochaetales	Spirochaetaceae	sf_1	6623	AB088865.1	termite gut homogenate clone Rs-D46 sp.
SR1	Unclassified	Unclassified	Unclassified	sf_1	2900
SR1	Unclassified	Unclassified	Unclassified	sf_1	2923
Synergistes	Unclassified	Unclassified	Unclassified	sf_3	60	AF481216.1	Flexistipes sp. str. E3_33
Synergistes	Unclassified	Unclassified	Unclassified	sf_3	117	AB089065.2	termite gut homogenate clone Rs-D89
Synergistes	Unclassified	Unclassified	Unclassified	sf_3	353	AY261810.1	UASB reactor granular sludge clone PD-UASB-13 G+C
Synergistes	Unclassified	Unclassified	Unclassified	sf_3	601	AF229792.1	terephthalate-degrading consortium clone TA19
Synergistes	Unclassified	Unclassified	Unclassified	sf_3	719	AY207056.1	Synergistes sp. P1 str. P4G_18
Termite group 1	Unclassified	Unclassified	Unclassified	sf_2	437	AB089050.2	termite gut homogenate clone Rs-D43 group
Termite group 1	Unclassified	Unclassified	Unclassified	sf_2	722	AB089051.1	termite gut homogenate clone Rs-H93 group
Thermodesulfobacteria	Thermodesulfobacteria	Thermodesulfobacteriales	Thermodesulfobacteriaceae	sf_1	667	AF411013.1	Geothermobacterium ferrireducens
Thermotogae	Thermotogae	Thermotogales	Thermotogaceae	sf_4	51	AJ419874.1	Thermosipho sp. str. MV1063
TM6	Unclassified	Unclassified	Unclassified	sf_1	10203	AY043739.1	forest soil clone NOS7.2WL
TM7	TM7-3	Unclassified	Unclassified	sf_1	2697	AJ576410.1	midgut homogenate Pachnoda ephippiata larva clone PeM47
TM7	TM7-3	Unclassified	Unclassified	sf_1	2917	AF507686.1	arid soil clone C026
TM7	TM7-3	Unclassified	Unclassified	sf_1	3044	AF513103.1	activated sludge foam clone 734
TM7	TM7-3	Unclassified	Unclassified	sf_1	3145	AF385520.1	tongue dorsa clone DR034
TM7	TM7-3	Unclassified	Unclassified	sf_1	3151	AF513102.1	activated sludge foam clone 71
TM7	TM7-3	Unclassified	Unclassified	sf_1	8155	AY134895.1	oral periodontitis clone EW086
TM7	Unclassified	Unclassified	Unclassified	sf_1	3025
TM7	Unclassified	Unclassified	Unclassified	sf_1	5061
TM7	Unclassified	Unclassified	Unclassified	sf_1	5177
Unclassified	Unclassified	Unclassified	Unclassified	sf_160	226
Unclassified	Unclassified	Unclassified	Unclassified	sf_106	243	AF027097.1	hot spring clone OPB25
Unclassified	Unclassified	Unclassified	Unclassified	sf_160	267
Unclassified	Unclassified	Unclassified	Unclassified	sf_160	333
Unclassified	Unclassified	Unclassified	Unclassified	sf_160	485	AY193179.1	thermal spring mat clone O1aA90
Unclassified	Unclassified	Unclassified	Unclassified	sf_160	651
Unclassified	Unclassified	Unclassified	Unclassified	sf_160	913
Unclassified	Unclassified	Unclassified	Unclassified	sf_93	925	AF254404.1	4MB-degrading consortium clone UASB_TL26
Unclassified	Unclassified	Unclassified	Unclassified	sf_160	1914
Unclassified	Unclassified	Unclassified	Unclassified	sf_160	2363
Unclassified	Unclassified	Unclassified	Unclassified	sf_160	2488
Unclassified	Unclassified	Unclassified	Unclassified	sf_95	2545	AB106352.1	anaerobic sludge isolate str. JE
Unclassified	Unclassified	Unclassified	Unclassified	sf_160	2930
Unclassified	Unclassified	Unclassified	Unclassified	sf_88	3098
Unclassified	Unclassified	Unclassified	Unclassified	sf_160	3229
Unclassified	Unclassified	Unclassified	Unclassified	sf_156	4291	AF507892.1	Mono Lake at depth 35m station 6 July 2000 clone ML635J-21 G+C
Unclassified	Unclassified	Unclassified	Unclassified	sf_160	4410
Unclassified	Unclassified	Unclassified	Unclassified	sf_34	4668
Unclassified	Unclassified	Unclassified	Unclassified	sf_148	5022	AF454327.1	plastid clone ML310M-37
Unclassified	Unclassified	Unclassified	Unclassified	sf_160	6337
Unclassified	Unclassified	Unclassified	Unclassified	sf_140	6355
Unclassified	Unclassified	Unclassified	Unclassified	sf_160	6360
Unclassified	Unclassified	Unclassified	Unclassified	sf_160	6401
Unclassified	Unclassified	Unclassified	Unclassified	sf_160	6430
Unclassified	Unclassified	Unclassified	Unclassified	sf_160	6456
Unclassified	Unclassified	Unclassified	Unclassified	sf_160	7444
Unclassified	Unclassified	Unclassified	Unclassified	sf_160	7767
Unclassified	Unclassified	Unclassified	Unclassified	sf_132	9820
Unclassified	Unclassified	Unclassified	Unclassified	sf_160	10012
Unclassified	Unclassified	Unclassified	Unclassified	sf_50	10421	AB089114.1	termite gut homogenate clone Rs-M28
Verrucomicrobia	Unclassified	Unclassified	Unclassified	sf_3	40	AJ401121.1	Elbe river clone DEV055
Verrucomicrobia	Unclassified	Unclassified	Unclassified	sf_4	288	U60012.1	Prosthecobacter dejongeii
Verrucomicrobia	Unclassified	Unclassified	Unclassified	sf_3	486	AJ401113.1	Elbe river clone DEV045
Verrucomicrobia	Unclassified	Unclassified	Unclassified	sf_5	686	AF419674.1	Guaymas Basin hydrothermal sediment clone a2b018
Verrucomicrobia	Verrucomicrobiae	Verrucomicrobiales	Unclassified	sf_3	11	AF234711.1	sludge clone H2
Verrucomicrobia	Verrucomicrobiae	Verrucomicrobiales	Unclassified	sf_4	169	AY114317.1	anoxic marine sediment clone LD1-PA26
Verrucomicrobia	Verrucomicrobiae	Verrucomicrobiales	Unclassified	sf_3	792	AB089122.1	termite gut homogenate clone Rs-P07 bacterium
Verrucomicrobia	Verrucomicrobiae	Verrucomicrobiales	Verrucomicrobia subdivision 5	sf_1	530	AY114334.1	anoxic marine sediment clone LD1-PB20
Verrucomicrobia	Verrucomicrobiae	Verrucomicrobiales	Verrucomicrobia subdivision 5	sf_1	533	AY114330.1	anoxic marine sediment clone LD1-PB12
Verrucomicrobia	Verrucomicrobiae	Verrucomicrobiales	Verrucomicrobia subdivision 5	sf_1	547	AY114329.1	anoxic marine sediment clone LD1-PB1
Verrucomicrobia	Verrucomicrobiae	Verrucomicrobiales	Verrucomicrobia subdivision 5	sf_1	629	AY114328.1	anoxic marine sediment clone LD1-PA50
Verrucomicrobia	Verrucomicrobiae	Verrucomicrobiales	Verrucomicrobia subdivision 5	sf_1	885	AJ390455.1	soil clone PBS-III-26
Verrucomicrobia	Verrucomicrobiae	Verrucomicrobiales	Verrucomicrobia subdivision 7	sf_1	446	AY114322.1	anoxic marine sediment clone LD1-PA34
Verrucomicrobia	Verrucomicrobiae	Verrucomicrobiales	Verrucomicrobia subdivision 7	sf_1	559	AY114314.1	anoxic marine sediment clone LD1-PA20
Verrucomicrobia	Verrucomicrobiae	Verrucomicrobiales	Verrucomicrobia subdivision 7	sf_1	760	AF454310.2	Mono lake clone ML316M-1
Verrucomicrobia	Verrucomicrobiae	Verrucomicrobiales	Verrucomicrobiaceae	sf_7	29	AB073978.1	Fucophilus fucoidanolyticus str. SI-1234
Verrucomicrobia	Verrucomicrobiae	Verrucomicrobiales	Verrucomicrobiaceae	sf_6	203	AY271254.1	Akkermansia muciniphila
Verrucomicrobia	Verrucomicrobiae	Verrucomicrobiales	Verrucomicrobiaceae	sf_6	613	AJ441222.1	hydrothermal vent polychaete mucous clone P. palm C 85
Verrucomicrobia	Verrucomicrobiae	Verrucomicrobiales	Verrucomicrobiaceae	sf_6	871
Verrucomicrobia	Verrucomicrobiae	Verrucomicrobiales	Verrucomicrobiaceae	sf_1	1024	AY244959.1	rumen clone BS5
Verrucomicrobia	Verrucomicrobiae	Verrucomicrobiales	Xiphinematobacteraceae	sf_3	888	AF217462.1	Candidatus Xiphinematobacter brevicolli
WS3	Unclassified	Unclassified	Unclassified	sf_3	95	AJ535231.1	marine sediment above hydrate ridge clone Hyd24-32
WS3	Unclassified	Unclassified	Unclassified	sf_1	2537	AY114325.1	anoxic marine sediment clone LD1-PA39
WS5	Unclassified	Unclassified	Unclassified	sf_2	8119	AF419661.1	Guaymas Basin hydrothermal sediment clone a2b013
