# Supplementary material for: Lactobacillus casei Abundance Is Associated with Profound Shifts in the Infant Gut Microbiome
Source: PLoS One. 2010 Jan 18;5(1):e8745. doi: 10.1371/journal.pone.0008745 (PMC2807455; doi:10.1371/journal.pone.0008745)
Supplement: Table S2 — Significantly correlated and T-tested taxa. A list of taxa that are significantly correlated, positively or negatively, with LGG together with those that demonstrate significant differences in abundance between high LGG (G1) and low LGG samples. (0.25 MB XLS) [file pone.0008745.s002.xls]

## Sheet: Sheet1
								High LGG vs Low LGG Sample T Test			LGG Correlation
Phylum	Class	Order	Family	SF ID*	Taxon ID*	NCBI Acc.	Rep. ProkMSA Name	P value	Q value	Abundance Change	Correlation Coefficient	P value	Q value
Firmicutes	Bacilli	Lactobacillales	Lactobacillaceae	sf_1	3821	M23928.1	Lactobacillus casei	4.35411e-06	0.00344971	3847.4	1	0	0
Proteobacteria	Betaproteobacteria	Burkholderiales	Oxalobacteraceae	sf_1	8058	Y10146.1	Herbaspirillum seropedicae str. DSM 6445 ATCC 35892	3.32866e-05	0.0127684	837	0.448967	0.0810778	0.182741
Chlorobi	Unclassified	Unclassified	Unclassified	sf_6	5294	AY221073.1	Mammoth cave clone CCM9b	6.43814e-05	0.0127684	582.4	0.649035	0.00652136	0.0865478
Proteobacteria	Gammaproteobacteria	Enterobacteriales	Enterobacteriaceae	sf_1	9391			7.51807e-05	0.0127684	670.4	0.361232	0.169233	0.242439
Actinobacteria	Actinobacteria	Actinomycetales	Gordoniaceae	sf_1	1567			8.05794e-05	0.0127684	1210	0.55889	0.0244161	0.122231
Firmicutes	Bacilli	Lactobacillales	Lactobacillaceae	sf_1	3587	AB063479.1	Lactobacillus fuchuensis str. JCM 11249	0.000119138	0.0137695	384.8	0.684121	0.00346886	0.0665068
Proteobacteria	Gammaproteobacteria	Alteromonadales	Alteromonadaceae	sf_1	8975	AB016268.1	Alteromonas sp. str. NIBH P1M3	0.000147789	0.0137695	633	0.388192	0.137329	0.220835
Proteobacteria	Epsilonproteobacteria	Campylobacterales	Helicobacteraceae	sf_3	10614	AJ431216.1	strain isolate str. BHI80-49	0.000176459	0.0137695	879.6	0.650309	0.00638212	0.0857328
Bacteroidetes	Flavobacteria	Flavobacteriales	Flavobacteriaceae	sf_1	5954	L39067.1	Flavobacterium hibernum str. ATCC51468	0.000222343	0.0137695	407.2	0.52273	0.037757	0.135933
Proteobacteria	Betaproteobacteria	Neisseriales	Neisseriaceae	sf_1	7675	AY157705.1	Neisseria sp. str. CCUG 46910	0.000277438	0.0137695	748.6	0.514533	0.0414256	0.141942
Proteobacteria	Epsilonproteobacteria	Campylobacterales	Helicobacteraceae	sf_3	10612	AJ441209.1	hydrothermal vent polychaete mucous clone P. palm C/A 64	0.000405402	0.0137695	760.6	0.582227	0.0179636	0.111264
Proteobacteria	Gammaproteobacteria	Enterobacteriales	Enterobacteriaceae	sf_1	8236	AF476110.1	Vryburgia amaryllidis symbiont	0.000423801	0.0137695	1076.8	0.699154	0.00257904	0.0591851
Proteobacteria	Betaproteobacteria	Rhodocyclales	Rhodocyclaceae	sf_1	7817	AY133064.1	TCE-contaminated site clone ccs265	0.000487897	0.0137695	1088.6	0.398027	0.126795	0.216111
Actinobacteria	Actinobacteria	Acidimicrobiales	Acidimicrobiaceae	sf_1	1856	AF523913.1	forested wetland clone RCP2-105	0.000498943	0.0137695	872	0.747155	0.000880004	0.0427387
Proteobacteria	Gammaproteobacteria	Alteromonadales	Alteromonadaceae	sf_1	8368	AJ507251.1	Pseudoalteromonas mariniglutinosa str. KMM 3635	0.000510796	0.0137695	727.8	0.41475	0.110188	0.20162
Proteobacteria	Alphaproteobacteria	Rhodobacterales	Rhodobacteraceae	sf_1	6980	AJ582226.1	Loktanella vestfoldensis str. LMG 22003	0.000530014	0.0137695	322.2	0.362666	0.167422	0.241744
Verrucomicrobia	Unclassified	Unclassified	Unclassified	sf_4	288	U60012.1	Prosthecobacter dejongeii	0.000531221	0.0137695	910	0.861137	1.83e-05	0.00505236
Proteobacteria	Epsilonproteobacteria	Campylobacterales	Helicobacteraceae	sf_3	10438	AF154101.1	hydrocarbon seep clone GCA014	0.000532448	0.0137695	744.8	0.56493	0.0225977	0.122181
Proteobacteria	Gammaproteobacteria	Vibrionales	Vibrionaceae	sf_1	8665	AY257975.1	Vibrio gallicus str. CIP 107867; HT 3-3	0.000535258	0.0137695	744.6	0.373523	0.15413	0.232936
Proteobacteria	Gammaproteobacteria	Alteromonadales	Alteromonadaceae	sf_1	9218	X67024.1	Pseudoalteromonas haloplanktis str. ATCC 14393	0.000537278	0.0137695	837	0.443662	0.0851808	0.185663
Proteobacteria	Gammaproteobacteria	Enterobacteriales	Enterobacteriaceae	sf_1	8631	AF476108.1	Planococcus ficus symbiont	0.00055719	0.0137695	869	0.339574	0.198177	0.257123
Proteobacteria	Gammaproteobacteria	Vibrionales	Vibrionaceae	sf_1	8888	AJ845014.1	Vibrio aestuarianus str. 01/151	0.000582989	0.0137695	788	0.393112	0.131987	0.21648
Proteobacteria	Gammaproteobacteria	Enterobacteriales	Enterobacteriaceae	sf_1	8590	AJ010486.1	Enterobacter pyrinus str. KCTC2520	0.000583889	0.0137695	496	0.359348	0.171632	0.243631
Proteobacteria	Gammaproteobacteria	Alteromonadales	Alteromonadaceae	sf_1	9364	U85855.1	Pseudoalteromonas prydzensis str. MB8-11	0.000595825	0.0137695	733.4	0.426754	0.0992502	0.194879
Proteobacteria	Gammaproteobacteria	Alteromonadales	Alteromonadaceae	sf_1	9143	AJ417594.1	Pseudoalteromonas agarivorans str. KMM 255	0.00061327	0.0137695	761	0.404589	0.120084	0.211304
Proteobacteria	Gammaproteobacteria	Vibrionales	Vibrionaceae	sf_1	9223	AY245191.1	Vibrio parahaemolyticus 22	0.000615454	0.0137695	723.2	0.403453	0.121228	0.212091
Proteobacteria	Gammaproteobacteria	Vibrionales	Vibrionaceae	sf_1	8798	AF172840.1	Vibrio aestuarianus str. KT0901	0.000619586	0.0137695	828	0.35761	0.173865	0.244459
Firmicutes	Bacilli	Lactobacillales	Lactobacillaceae	sf_1	3521	AJ271383.1	Pediococcus inopinatus str. DSM 20285	0.000649379	0.0137695	1099.2	0.473235	0.0641077	0.165378
Proteobacteria	Gammaproteobacteria	Enterobacteriales	Enterobacteriaceae	sf_1	9309	AJ417833.1	Buchnera sp	0.000674439	0.0137695	1021.8	0.288698	0.278179	0.294128
Proteobacteria	Deltaproteobacteria	EB1021 group	Unclassified	sf_4	9741	AJ518791.1	uranium mining waste pile clone JG37-AG-30 proteobacterium	0.000678304	0.0137695	484	0.74659	0.000892388	0.0427387
Proteobacteria	Epsilonproteobacteria	Campylobacterales	Helicobacteraceae	sf_3	10602			0.000684304	0.0137695	543.2	0.586564	0.0169267	0.110327
Proteobacteria	Gammaproteobacteria	Alteromonadales	Alteromonadaceae	sf_1	8580	AJ295713.1	Arctic seawater isolate str. R7076	0.000692745	0.0137695	743.2	0.426013	0.0999017	0.195154
Proteobacteria	Epsilonproteobacteria	Campylobacterales	Unclassified	sf_1	10497	AY261811.1	UASB reactor granular sludge clone PD-UASB-2 proteobacterium	0.000712207	0.0137695	603.8	0.411498	0.11329	0.203601
Verrucomicrobia	Unclassified	Unclassified	Unclassified	sf_5	686	AF419674.1	Guaymas Basin hydrothermal sediment clone a2b018	0.000712729	0.0137695	1074.8	0.862389	1.73e-05	0.00505236
Proteobacteria	Gammaproteobacteria	Enterobacteriales	Enterobacteriaceae	sf_1	8640			0.000741546	0.0137695	912.6	0.238125	0.374483	0.332102
Proteobacteria	Betaproteobacteria	Burkholderiales	Alcaligenaceae	sf_1	7984	AJ318125.1	Waste-gas biofilter clone BIfciii38	0.000751233	0.0137695	965.8	0.436316	0.0911051	0.191068
Verrucomicrobia	Verrucomicrobiae	Verrucomicrobiales	Unclassified	sf_3	11	AF234711.1	sludge clone H2	0.000760192	0.0137695	738.6	0.870999	1.13e-05	0.00505236
Proteobacteria	Gammaproteobacteria	Enterobacteriales	Enterobacteriaceae	sf_1	8632	AB018593.1	Selenate-reducing isolate str. TSA	0.000783275	0.0137695	954.4	0.478993	0.0604958	0.163037
Proteobacteria	Epsilonproteobacteria	Campylobacterales	Helicobacteraceae	sf_3	10432	AF449246.1	Riftia pachyptila's tube clone R76-B51	0.000807463	0.0137695	859.4	0.563975	0.0228781	0.122181
Chloroflexi	Anaerolineae	Chloroflexi-1f	Unclassified	sf_1	27	AJ249103.1	DCP-dechlorinating consortium clone SHA-21	0.00081273	0.0137695	480	0.681848	0.00362261	0.0665068
Proteobacteria	Gammaproteobacteria	Alteromonadales	Alteromonadaceae	sf_1	9009	AF022402.1	Shewanella sp. ANG.209 str. ANG.strain 209 ANG.209	0.000821761	0.0137695	464.2	0.290983	0.27422	0.292556
Proteobacteria	Gammaproteobacteria	Enterobacteriales	Enterobacteriaceae	sf_1	8693	AF130912.1	Pantoea agglomerans str. A40	0.000827317	0.0137695	1015.2	0.265892	0.319559	0.307964
Proteobacteria	Gammaproteobacteria	Alteromonadales	Shewanellaceae	sf_1	8641	AJ252022.1	Moritella abyssi str. 2693	0.000832947	0.0137695	782	0.325607	0.218449	0.265032
Proteobacteria	Gammaproteobacteria	Vibrionales	Vibrionaceae	sf_1	8999	AY292944.1	Photobacterium leiognathi str. LN101	0.000857879	0.0137695	708.4	0.360318	0.170395	0.242813
Proteobacteria	Gammaproteobacteria	Alteromonadales	Alteromonadaceae	sf_1	9384	AJ132226.1	Moritella viscosa str. NVI 88/478T	0.00087963	0.0137695	766.4	0.353397	0.179358	0.246198
Proteobacteria	Gammaproteobacteria	Vibrionales	Vibrionaceae	sf_1	8267	AJ491290.1	Vibrio pomeroyi str. LMG 20537	0.000885429	0.0137695	847.2	0.338438	0.199779	0.257657
Proteobacteria	Betaproteobacteria	Burkholderiales	Ralstoniaceae	sf_1	8128	M32021.1	Cupriavidus necator	0.000892802	0.0137695	911.2	0.436871	0.0906479	0.191068
Proteobacteria	Gammaproteobacteria	Enterobacteriales	Enterobacteriaceae	sf_1	9029	AY280573.1	Photorhabdus asymbiotica subsp. australis str. MB	0.000922456	0.0137695	861.8	0.304537	0.251449	0.281644
Proteobacteria	Gammaproteobacteria	Pseudomonadales	Moraxellaceae	sf_3	9428	AF143841.1	hydrocarbon-degrading consortium clone AF2-1D	0.000929782	0.0137695	888.6	0.508879	0.0441083	0.145469
Proteobacteria	Gammaproteobacteria	Enterobacteriales	Enterobacteriaceae	sf_1	9135	AJ487029.1	intestine Zophobas mori clone	0.000932184	0.0137695	1112.8	0.27935	0.294728	0.301358
Proteobacteria	Deltaproteobacteria	Desulfovibrionales	Desulfovibrionaceae	sf_1	10248	AF418170.1	Desulfovibrio giganteus str. DSM 4370	0.000932322	0.0137695	534.6	0.471599	0.0651618	0.166064
Proteobacteria	Gammaproteobacteria	Unclassified	Unclassified	sf_3	8714	AB021372.1	Marinobacter hydrocarbonoclasticus str. ATCC 27132T	0.00093922	0.0137695	660.8	0.426492	0.0994801	0.194982
Proteobacteria	Betaproteobacteria	Methylophilales	Methylophilaceae	sf_1	8137	AF289159.1	freshwater clone PRD01a011B	0.00102463	0.0137695	813.8	0.326615	0.216944	0.264348
Actinobacteria	Actinobacteria	Acidimicrobiales	Acidimicrobiaceae	sf_1	1749	AY913475.1	forest soil clone DUNssu275 (-3A) (OTU#188)	0.00102744	0.0137695	674.4	0.660683	0.00533454	0.0783588
Proteobacteria	Deltaproteobacteria	Desulfobacterales	Desulfobulbaceae	sf_1	10097	AB100004.1	inactive deep-sea hydrothermal vent chimneys clone IndB2-42	0.00107552	0.0137695	698.4	0.482989	0.058079	0.159293
Proteobacteria	Gammaproteobacteria	Vibrionales	Vibrionaceae	sf_1	8707	AF513465.1	Vibrio sp. str. PH19	0.00110164	0.0137695	717	0.41707	0.108011	0.200871
Proteobacteria	Gammaproteobacteria	Alteromonadales	Alteromonadaceae	sf_1	9035	AB124836.1	Microbulbifer sp. str. JAMB-A94	0.00111521	0.0137695	568.4	0.337662	0.200877	0.257657
Actinobacteria	Actinobacteria	Unclassified	Unclassified	sf_1	1367			0.00114396	0.0137695	789	0.673427	0.00424071	0.0719453
Acidobacteria	Acidobacteria	Acidobacteriales	Acidobacteriaceae	sf_14	208	AJ519665.1	uranium mill tailings soil sample clone GuBH2-AD-9 sp.	0.00118434	0.0137695	458.8	0.799748	0.000200186	0.0243265
Proteobacteria	Gammaproteobacteria	Alteromonadales	Alteromonadaceae	sf_1	9640	AY028205.1	exposed to diatom detritus isolate str. Tw-10 Tw-10	0.00118997	0.0137695	850	0.416847	0.108219	0.200871
Proteobacteria	Gammaproteobacteria	Enterobacteriales	Enterobacteriaceae	sf_1	8624	AF476105.1	Erium globosum symbiont	0.00120338	0.0137695	543.8	0.341191	0.195913	0.255087
Proteobacteria	Gammaproteobacteria	Enterobacteriales	Enterobacteriaceae	sf_1	9302	AF373198.1	Pantoea subsp. stewartii str. GSPB 2626	0.00122048	0.0137695	1055	0.282211	0.289603	0.298416
Proteobacteria	Betaproteobacteria	Burkholderiales	Alcaligenaceae	sf_1	7838	AB195161.1	Alcaligenes defragrans str. PD-19	0.00122619	0.0137695	1045.8	0.400339	0.124402	0.21507
Proteobacteria	Gammaproteobacteria	Alteromonadales	Alteromonadaceae	sf_1	8174	AF114499.1	attached marine recovered surface clone 17 proteobacterium	0.00125427	0.0137695	732.2	0.462856	0.071012	0.173223
Proteobacteria	Gammaproteobacteria	Enterobacteriales	Enterobacteriaceae	sf_1	9082	AJ223469.1	Brenneria quercina str. LMG 2724-T	0.00126124	0.0137695	963.6	0.351787	0.181486	0.246198
Proteobacteria	Gammaproteobacteria	Enterobacteriales	Enterobacteriaceae	sf_1	9358	U92194.1	Salmonella subsp. enterica serovar Waycross str. Swy1 subsp.	0.00126485	0.0137695	967.8	0.335029	0.204635	0.259732
Proteobacteria	Deltaproteobacteria	Syntrophobacterales	Syntrophobacteraceae	sf_1	9731	AJ518795.1	uranium mining waste pile clone JG37-AG-90 proteobacterium	0.00126628	0.0137695	654.6	0.611384	0.0118556	0.0967355
Proteobacteria	Gammaproteobacteria	Enterobacteriales	Enterobacteriaceae	sf_1	8716	AB033602.1	Pantoea agglomerans	0.00132849	0.0137695	365.8	0.41488	0.110065	0.20162
Proteobacteria	Gammaproteobacteria	Alteromonadales	Shewanellaceae	sf_1	8662			0.00132934	0.0137695	930.4	0.336259	0.202875	0.258508
Proteobacteria	Gammaproteobacteria	Oceanospirillales	Unclassified	sf_3	8327	AF468398.1	Arctic sea ice ARK10148	0.00133256	0.0137695	528.6	0.322784	0.222701	0.266065
Proteobacteria	Gammaproteobacteria	Enterobacteriales	Enterobacteriaceae	sf_1	9345	AF141891.1	Erwinia amylovora str. BC199(=Ea528)	0.00133718	0.0137695	942.4	0.264961	0.321321	0.308851
Proteobacteria	Gammaproteobacteria	Enterobacteriales	Enterobacteriaceae	sf_1	8450	AY043168.1	Morganella morganii	0.00134658	0.0137695	608.4	0.369268	0.159252	0.235963
Proteobacteria	Gammaproteobacteria	Enterobacteriales	Enterobacteriaceae	sf_1	8286	AF476102.1	Cyphonococcus alpinus symbiont	0.001367	0.0137695	604.8	0.381813	0.144474	0.226376
Proteobacteria	Gammaproteobacteria	Enterobacteriales	Enterobacteriaceae	sf_1	8936	AF543283.1	Klebsiella oxytoca str. ChDC OS31	0.00137341	0.0137695	945.2	0.30075	0.25769	0.284993
Proteobacteria	Gammaproteobacteria	Enterobacteriales	Enterobacteriaceae	sf_6	646	AY695840.1	Opitutus sp. str. SA-9	0.00137363	0.0137695	640	0.793529	0.000243605	0.0243265
Proteobacteria	Gammaproteobacteria	Enterobacteriales	Unclassified	sf_1	8430	AF029226.1	Salmonella bongori str. JEO 4162	0.00138345	0.0137695	1047.8	0.236251	0.378365	0.333635
Proteobacteria	Gammaproteobacteria	Alteromonadales	Alteromonadaceae	sf_1	9205	AF354597.1	marine clone Arctic96B-17	0.00138525	0.0137695	536.6	0.372654	0.155168	0.232936
Proteobacteria	Gammaproteobacteria	Enterobacteriales	Enterobacteriaceae	sf_1	8379	AF289542.1	Erwinia amylovora EA G-5	0.00139453	0.0137695	899.2	0.292471	0.271661	0.291091
Proteobacteria	Gammaproteobacteria	Vibrionales	Vibrionaceae	sf_1	8223	AY911392.1	Vibrio shilonii str. MP-3	0.00140154	0.0137695	735.2	0.360671	0.169945	0.242741
Proteobacteria	Gammaproteobacteria	Alteromonadales	Alteromonadaceae	sf_1	8172	AB055791.1	Pseudoalteromonas sp. str. Bdeep-1	0.00140226	0.0137695	541.2	0.316966	0.231631	0.271682
Proteobacteria	Deltaproteobacteria	Desulfobacterales	Unclassified	sf_3	468	AJ241004.1	marine sediment clone Sva0515	0.00143936	0.0137695	686.8	0.627795	0.00922031	0.0964431
Proteobacteria	Gammaproteobacteria	Enterobacteriales	Enterobacteriaceae	sf_1	9142	AJ233410.1	Erwinia amylovora str. DSM 30165	0.00145873	0.0137695	919.4	0.283065	0.288082	0.297715
Proteobacteria	Gammaproteobacteria	Alteromonadales	Shewanellaceae	sf_1	8581	AB008796.1	Shewanella benthica str. DB21MT-2	0.0014801	0.0137695	738.6	0.355666	0.176385	0.245319
Proteobacteria	Gammaproteobacteria	Enterobacteriales	Enterobacteriaceae	sf_1	9264	AJ007405.1	Photorhabdus temperata str. XINach	0.00149166	0.0137695	632.8	0.267502	0.316527	0.306931
Verrucomicrobia	Verrucomicrobiae	Verrucomicrobiales	Verrucomicrobiaceae	sf_6	203	AY271254.1	Akkermansia muciniphila	0.00149388	0.0137695	624.8	0.718496	0.00171537	0.0565381
Proteobacteria	Gammaproteobacteria	Alteromonadales	Alteromonadaceae	sf_1	9058	X82136.1	Pseudoalteromonas carrageenovora str. ATCC 12662T	0.00149464	0.0137695	774.6	0.407339	0.117347	0.208047
Proteobacteria	Gammaproteobacteria	Alteromonadales	Alteromonadaceae	sf_1	9369	X82144.1	Pseudoalteromonas luteoviolacea str. NCIMB 1893T	0.00155866	0.0141943	506.8	0.350177	0.183632	0.248192
Proteobacteria	Gammaproteobacteria	Alteromonadales	Alteromonadaceae	sf_1	8336	AF237977.1	Alteromonas sp. str. MS23	0.00158859	0.0143025	716.4	0.412968	0.111881	0.202697
Proteobacteria	Gammaproteobacteria	Enterobacteriales	Enterobacteriaceae	sf_6	8783	AF075271.2	Alterococcus agarolyticus str. ADT3; CCRC17102	0.00163892	0.0143841	994	0.269237	0.313278	0.306742
Proteobacteria	Alphaproteobacteria	Unclassified	Unclassified	sf_2	6697	AB089090.1	termite gut homogenate clone Rs-D84 proteobacterium	0.00164025	0.0143841	833.6	0.520564	0.0387014	0.137518
Proteobacteria	Gammaproteobacteria	Alteromonadales	Alteromonadaceae	sf_1	8753	AY553079.1	Idiomarina loihiensis str. GSP37	0.00165212	0.0143841	945.4	0.398661	0.126136	0.216111
Proteobacteria	Gammaproteobacteria	Enterobacteriales	Enterobacteriaceae	sf_1	8742	AF084835.1	USA:New York isolate str. KN4	0.00169132	0.0144223	970.4	0.285826	0.283203	0.296898
Proteobacteria	Gammaproteobacteria	Alteromonadales	Alteromonadaceae	sf_1	9019			0.00170678	0.0144223	625.6	0.630285	0.00886461	0.0957316
Proteobacteria	Gammaproteobacteria	Enterobacteriales	Enterobacteriaceae	sf_1	8251	AF214640.1	Nitrogen-fixing isolate str. CANF3	0.00172499	0.0144223	938.6	0.267854	0.315867	0.306931
Proteobacteria	Gammaproteobacteria	Alteromonadales	Alteromonadaceae	sf_1	9230	AY165576.1	Antarctic pack ice Lasarev Sea Southern Ocean clone ANTXI/4_14-62 sea	0.00172932	0.0144223	813.6	0.735862	0.00115606	0.0471642
Proteobacteria	Gammaproteobacteria	Enterobacteriales	Enterobacteriaceae	sf_1	8886	AF170176.1	Salmonella typhimurium LT2 str. SGSC1412	0.00180867	0.0146021	908.8	0.271897	0.308335	0.306178
Proteobacteria	Gammaproteobacteria	Alteromonadales	Alteromonadaceae	sf_1	9288	AJ295715.1	Alteromonas stellipolaris str. LMG 21861	0.00184079	0.0146021	751	0.358614	0.172573	0.244337
Proteobacteria	Gammaproteobacteria	Oceanospirillales	Unclassified	sf_3	8230			0.00184542	0.0146021	866	0.544523	0.0291921	0.128555
Firmicutes	Bacilli	Bacillales	Bacillaceae	sf_1	3266	AF526924.2	Mars Odyssey Orbiter and encapsulation facility clone T6-7 sp.	0.00185103	0.0146021	852.8	0.548282	0.0278788	0.128555
Proteobacteria	Gammaproteobacteria	Enterobacteriales	Enterobacteriaceae	sf_1	8528	Y17665.1	Enterobacter cloacae Nr. 3	0.00187351	0.0146021	961.2	0.228911	0.393784	0.341278
Proteobacteria	Gammaproteobacteria	Enterobacteriales	Enterobacteriaceae	sf_1	8505	AJ233406.1	Buttiauxella warmboldiae str. DSM 9404	0.00188206	0.0146021	849.4	0.253222	0.344009	0.319686
Lentisphaerae	Unclassified	Unclassified	Unclassified	sf_5	10027	AJ431234.1	Cytophaga sp. str. Dex80-43	0.00189313	0.0146021	660.2	0.612085	0.0117322	0.0964431
Proteobacteria	Gammaproteobacteria	Enterobacteriales	Enterobacteriaceae	sf_1	8504	AF476104.1	Dysmicoccus neobrevipes symbiont	0.00190799	0.0146021	712.8	0.343635	0.192521	0.253869
Proteobacteria	Gammaproteobacteria	Enterobacteriales	Enterobacteriaceae	sf_1	8554	AJ627202.1	Kluyvera ascorbata 69	0.00193631	0.0146021	922.8	0.233131	0.384879	0.335939
Proteobacteria	Gammaproteobacteria	Alteromonadales	Alteromonadaceae	sf_1	9386	AB016267.1	Alteromonas sp. str. NIBH P2M11	0.00195355	0.0146021	753.8	0.416185	0.108837	0.200871
Proteobacteria	Epsilonproteobacteria	Campylobacterales	Unclassified	sf_1	10480	AJ441204.1	hydrothermal vent polychaete mucous clone P. palm C 84	0.00195362	0.0146021	636.8	0.587303	0.0167546	0.110234
Proteobacteria	Gammaproteobacteria	Enterobacteriales	Enterobacteriaceae	sf_1	8740	AF373201.1	Erwinia chrysanthemi str. 573	0.00200344	0.0147412	745	0.255285	0.339959	0.317082
Proteobacteria	Gammaproteobacteria	Pseudomonadales	Moraxellaceae	sf_3	8604	AB087260.2	Moraxella oblonga str. IAM 14971	0.00202261	0.0147412	866	0.43787	0.0898282	0.19102
Actinobacteria	Actinobacteria	Actinomycetales	Frankiaceae	sf_1	1161	AJ408876.1	Frankia sp. MRn2-2	0.00203205	0.0147412	582.6	0.704541	0.00230935	0.0584775
Proteobacteria	Betaproteobacteria	Unclassified	Unclassified	sf_3	7974			0.00208776	0.0147412	608.6	0.530905	0.0343475	0.134106
Unclassified	Unclassified	Unclassified	Unclassified	sf_160	6360			0.00208795	0.0147412	528	0.642441	0.00728102	0.0865969
Proteobacteria	Gammaproteobacteria	Alteromonadales	Pseudoalteromonadaceae	sf_1	9339	AF284230.1	Pseudoalteromonas sp. str. 05	0.00209366	0.0147412	993.2	0.591466	0.0158113	0.108854
Proteobacteria	Betaproteobacteria	Burkholderiales	Oxalobacteraceae	sf_1	7843	U54470.1	Massilia timonae timone	0.00210247	0.0147412	757.8	0.451432	0.0792202	0.181211
Proteobacteria	Gammaproteobacteria	Enterobacteriales	Enterobacteriaceae	sf_1	8529	AF181574.1	Raoultella planticola 7	0.00224304	0.0151765	982.6	0.256634	0.337324	0.316232
Proteobacteria	Gammaproteobacteria	Enterobacteriales	Enterobacteriaceae	sf_1	8885	AB089246.1	Morganella morganii str. AP28	0.00225271	0.0151765	943	0.239614	0.371414	0.33091
Proteobacteria	Gammaproteobacteria	Alteromonadales	Alteromonadaceae	sf_1	8371			0.00225419	0.0151765	241.6	0.424698	0.101067	0.196345
Proteobacteria	Gammaproteobacteria	Enterobacteriales	Enterobacteriaceae	sf_1	9157	AF293618.1	Secondary symbiont type-U Acyrthosiphon pisum (rrs) clone 5B type-U	0.00226565	0.0151765	813.8	0.418556	0.106632	0.200629
Proteobacteria	Gammaproteobacteria	Pseudomonadales	Pseudomonadaceae	sf_1	9295			0.0023011	0.0151765	672.2	0.431833	0.0948625	0.193198
Proteobacteria	Gammaproteobacteria	Alteromonadales	Alteromonadaceae	sf_1	8932	AF045560.1	Pseudoalteromonas antarctica str. N-1	0.00230526	0.0151765	880.6	0.394742	0.130249	0.21648
Proteobacteria	Gammaproteobacteria	Alteromonadales	Shewanellaceae	sf_1	9081	AB059264.1	Shewanella sp. str. MTW-1	0.00231422	0.0151765	775	0.345661	0.189739	0.252726
Acidobacteria	Acidobacteria	Acidobacteriales	Acidobacteriaceae	sf_14	105	AJ535239.1	marine sediment above hydrate ridge clone Hyd24-44 sp.	0.00233149	0.0151765	647.8	0.595875	0.0148579	0.107673
Proteobacteria	Gammaproteobacteria	Enterobacteriales	Enterobacteriaceae	sf_1	9496			0.00236448	0.0151765	937.6	0.267156	0.317177	0.307071
Acidobacteria	Acidobacteria	Acidobacteriales	Acidobacteriaceae	sf_14	541	AJ519667.1	uranium mill tailings soil sample clone GuBH2-AG-47 sp.	0.00237332	0.0151765	571.8	0.547299	0.0282177	0.128555
Proteobacteria	Gammaproteobacteria	Enterobacteriales	Enterobacteriaceae	sf_1	9651	AF373176.1	Pectobacterium subsp. atrosepticum str. GSPB 1710	0.00238192	0.0151765	825	0.245963	0.358481	0.326344
Proteobacteria	Gammaproteobacteria	Aeromonadales	Aeromonadaceae	sf_1	9294	AJ557849.1	Arctic deep sea Isolation common chemoorganotrophic oxygen-respiring polar current d 1210 (50 m above sediment Hakon Mosby Mud Vulcano (HMMV 72N 14E)) via serial dilution series applying 2 g/l yeast or meat extract artifical seawater	0.00239442	0.0151765	628.6	0.530339	0.0345757	0.134106
Proteobacteria	Gammaproteobacteria	Pseudomonadales	Moraxellaceae	sf_3	8366	AJ609556.1	Psychrobacter frigidicola str. DSM 12411	0.00243262	0.0152963	762.4	0.433071	0.0938139	0.193198
Proteobacteria	Gammaproteobacteria	Pseudomonadales	Moraxellaceae	sf_3	9641	X81662.1	Acinetobacter haemolyticus	0.00247135	0.0153399	760.4	0.471679	0.0651097	0.166064
Proteobacteria	Gammaproteobacteria	Enterobacteriales	Enterobacteriaceae	sf_1	8473	M59155.1	Hafnia alvei	0.00248853	0.0153399	962.8	0.241879	0.36677	0.32946
Proteobacteria	Gammaproteobacteria	Alteromonadales	Alteromonadaceae	sf_1	8643	AY771715.1	Pseudoalteromonas porphyrae str. S2-65	0.00250089	0.0153399	886.6	0.587612	0.0166832	0.110234
Proteobacteria	Gammaproteobacteria	Oceanospirillales	Oceanospirillaceae	sf_1	8653	AF382127.1	bacterioplankton clone ZA3706c	0.00254792	0.0153399	551	0.49793	0.0496699	0.152403
Proteobacteria	Gammaproteobacteria	Enterobacteriales	Enterobacteriaceae	sf_1	8603	AF476106.1	Melanococcus albizziae symbiont	0.0025533	0.0153399	958.6	0.266505	0.318402	0.307175
Proteobacteria	Gammaproteobacteria	Enterobacteriales	Enterobacteriaceae	sf_1	9363	AF025365.1	Citrobacter freundii str. CDC 621-64	0.00257949	0.0153399	906.6	0.25562	0.339303	0.316739
Proteobacteria	Gammaproteobacteria	Unclassified	Unclassified	sf_3	9367	AF387348.1	USA: Pacific Ocean seawater Naha Vents Hawaii isolate str. PV-4	0.00258113	0.0153399	920.2	0.370873	0.157306	0.234793
Acidobacteria	Acidobacteria	Acidobacteriales	Acidobacteriaceae	sf_14	1040			0.00259444	0.0153399	576.4	0.614147	0.0113749	0.0964431
Proteobacteria	Betaproteobacteria	Burkholderiales	Alcaligenaceae	sf_1	7992	AJ509012.1	Alcaligenes faecalis 5659-H	0.00265248	0.0154833	595.6	0.431416	0.0952174	0.193198
Bacteroidetes	Sphingobacteria	Sphingobacteriales	Sphingobacteriaceae	sf_1	5513	AF385549.1	crevicular epithelial cells clone AZ123	0.00265779	0.0154833	618	0.594198	0.015215	0.108673
Gemmatimonadetes	Unclassified	Unclassified	Unclassified	sf_5	1127	AJ519396.1	uranium mining waste pile near Johanngeorgenstadt soil clone JG37-AG-21	0.00268723	0.0155281	554.2	0.51893	0.039426	0.13875
Actinobacteria	Actinobacteria	Acidimicrobiales	Acidimicrobiaceae	sf_1	2030	AF523914.1	forested wetland clone RCP1-33	0.00271094	0.0155281	1516.6	0.788642	0.000282966	0.0243265
Proteobacteria	Gammaproteobacteria	Alteromonadales	Alteromonadaceae	sf_1	8579	AJ416756.1	Psychromonas profunda str. 2825	0.00272428	0.0155281	804	0.49251	0.0526081	0.153686
Actinobacteria	Actinobacteria	Acidimicrobiales	Acidimicrobiaceae	sf_1	2014	AY093455.1	marine sediment clone MB-A2-100	0.00278166	0.0156176	993.8	0.78523	0.000313452	0.0246626
Nitrospira	Nitrospira	Nitrospirales	Nitrospiraceae	sf_1	864	Y14644.1	nitrifying sludge clone GC86	0.0027888	0.0156176	1478.6	0.755572	0.00071156	0.0427387
Proteobacteria	Gammaproteobacteria	Enterobacteriales	Enterobacteriaceae	sf_1	8530	AJ489826.1	Enterobacteriaceae CF01Ent-1	0.00279911	0.0156176	894.6	0.234933	0.38111	0.333972
Proteobacteria	Gammaproteobacteria	Enterobacteriales	Enterobacteriaceae	sf_1	8558	U80200.1	Erwinia chrysanthemi str. ATCC 11663	0.00294137	0.0162966	752.8	0.336751	0.202172	0.258351
Proteobacteria	Gammaproteobacteria	Alteromonadales	Alteromonadaceae	sf_1	8222			0.00301299	0.0165774	657.8	0.385197	0.140653	0.223739
Proteobacteria	Gammaproteobacteria	Enterobacteriales	Enterobacteriaceae	sf_1	9274	AJ550468.1	Enterobacter sp. CC1	0.00308828	0.0167968	767.6	0.230679	0.390038	0.339753
Actinobacteria	Actinobacteria	Actinomycetales	Micrococcaceae	sf_1	1324	AF479325.1	glacial ice isolate str. CanDirty1	0.00309525	0.0167968	553.8	0.694128	0.00285315	0.0622697
Proteobacteria	Gammaproteobacteria	Enterobacteriales	Enterobacteriaceae	sf_1	9390	Z96077.1	Enterobacter nimipressuralis str. LMG 10245-T	0.00316418	0.017054	809.2	0.246948	0.356497	0.325615
Proteobacteria	Alphaproteobacteria	Sphingomonadales	Sphingomonadaceae	sf_1	7532	AF115500.1	Caulobacter sp. str. WCP2020S	0.00324176	0.0173541	440.6	0.5585	0.0245372	0.122231
Proteobacteria	Gammaproteobacteria	Aeromonadales	Aeromonadaceae	sf_1	9245	AB105442.1	Batch reactor filled with cyanobacterial bloom and lake water clone -8	0.00330206	0.0174048	482.6	0.418469	0.106713	0.200629
Proteobacteria	Deltaproteobacteria	Unclassified	Unclassified	sf_9	9738	AF354149.1	marine methane seep clone 1513	0.00331341	0.0174048	406.8	0.491192	0.0533416	0.154332
Chloroflexi	Dehalococcoidetes	Unclassified	Unclassified	sf_1	2485			0.00333184	0.0174048	985.2	0.838934	4.87e-05	0.0107296
Proteobacteria	Gammaproteobacteria	Shewanella	Unclassified	sf_1	9344	AF005249.1	Shewanella algae str. ATCC 51192	0.00336839	0.0174048	765.8	0.323913	0.220995	0.265706
Proteobacteria	Betaproteobacteria	Burkholderiales	Burkholderiaceae	sf_1	7960	AF476086.1	Ferrisia sp. symbiont	0.00339082	0.0174048	686.8	0.481139	0.0591892	0.160588
Verrucomicrobia	Verrucomicrobiae	Verrucomicrobiales	Verrucomicrobiaceae	sf_7	29	AB073978.1	Fucophilus fucoidanolyticus str. SI-1234	0.00340482	0.0174048	652.4	0.739506	0.0010602	0.0449168
Proteobacteria	Gammaproteobacteria	Unclassified	Unclassified	sf_3	8245			0.00340501	0.0174048	482.6	0.417666	0.107457	0.200871
Proteobacteria	Gammaproteobacteria	Enterobacteriales	Enterobacteriaceae	sf_1	8890	X93216.1	Raoultella planticola str. DR3	0.00345475	0.0174503	943.2	0.258041	0.334588	0.315007
Proteobacteria	Alphaproteobacteria	Rhodobacterales	Rhodobacteraceae	sf_1	7040	D32238.1	Paracoccus alcaliphilus str. JCM 7364	0.00345796	0.0174503	452.8	0.459896	0.0730771	0.174957
Proteobacteria	Gammaproteobacteria	Enterobacteriales	Enterobacteriaceae	sf_1	8627	AF476099.1	Australicoccus grevilleae symbiont	0.00348264	0.0174636	541	0.294278	0.268573	0.290325
Proteobacteria	Gammaproteobacteria	Pseudomonadales	Moraxellaceae	sf_3	8727	AY251390.1	Alkanindiges hongkongensis str. HKU9	0.00358614	0.0177082	799	0.473708	0.0638051	0.165269
Proteobacteria	Epsilonproteobacteria	Campylobacterales	Helicobacteraceae	sf_3	10562	AF286053.1	Helicobacter rappini W.Tee-Yu	0.0036179	0.0177082	571.2	0.585377	0.0172057	0.110833
Proteobacteria	Gammaproteobacteria	Enterobacteriales	Enterobacteriaceae	sf_1	9060	AJ853891.1	Enterobacter ludwigii str. EN-119 = DSMZ 16688	0.00362206	0.0177082	861.4	0.253188	0.344076	0.319686
Chloroflexi	Anaerolineae	Chloroflexi-1b	Unclassified	sf_2	789	AF445676.1	travertine hot spring clone SM1D10	0.00362335	0.0177082	1191.4	0.770903	0.000472687	0.0306281
Proteobacteria	Gammaproteobacteria	Alteromonadales	Alteromonadaceae	sf_1	9067	AF006669.1	Shewanella algae str. ACM 4733	0.00364317	0.0177082	758	0.318144	0.229804	0.270733
Proteobacteria	Gammaproteobacteria	Alteromonadales	Alteromonadaceae	sf_1	8970	AJ295716.1	Arctic seawater isolate str. R9879	0.00377026	0.0178343	677.6	0.40101	0.123713	0.214267
Proteobacteria	Gammaproteobacteria	Legionellales	Coxiellaceae	sf_3	7893	AJ252651.1	agricultural soil clone SC-I-71	0.00383977	0.0178343	552.8	0.477463	0.0614405	0.163475
Proteobacteria	Gammaproteobacteria	Acidithiobacillales	Acidithiobacillaceae	sf_1	9224	AJ459804.1	Acidithiobacillus albertensis str. DSM 14366	0.00385095	0.0178343	626.8	0.482655	0.0582782	0.159293
Proteobacteria	Gammaproteobacteria	Enterobacteriales	Enterobacteriaceae	sf_1	8510	AJ233420.1	Klebsiella pneumoniae str. DSM 30104	0.00389119	0.0178343	804.4	0.267497	0.316537	0.306931
Proteobacteria	Epsilonproteobacteria	Campylobacterales	Helicobacteraceae	sf_3	10428	AF034135.1	Flexispira rappini FH 9702248	0.00389468	0.0178343	507.4	0.532502	0.0337095	0.134106
Proteobacteria	Deltaproteobacteria	Myxococcales	Polyangiaceae	sf_3	9735	AJ518790.1	uranium mining waste pile clone JG37-AG-15 proteobacterium	0.00390929	0.0178343	916.8	0.643022	0.0072114	0.0865969
Proteobacteria	Betaproteobacteria	Burkholderiales	Oxalobacteraceae	sf_1	8034	Y08845.1	Janthinobacterium agaricidamnosum str. W1r3T	0.00391831	0.0178343	1042.6	0.376037	0.151158	0.2319
Actinobacteria	Actinobacteria	Actinomycetales	Nocardiaceae	sf_1	1454	AB092561.1	Nocardia yamanashiensis str. IFM 0265	0.00394153	0.0178343	554	0.741656	0.00100674	0.0449168
Actinobacteria	Actinobacteria	Actinomycetales	Dermabacteraceae	sf_1	1677	X91030.1	Brachybacterium conglomeratum str. NCIB 9859	0.00394852	0.0178343	324	0.599563	0.0140953	0.105622
Proteobacteria	Gammaproteobacteria	Alteromonadales	Alteromonadaceae	sf_1	9324	AF316891.1	Pseudoalteromonas ruthenica str. KMM300	0.00399147	0.0178343	1056.2	0.332444	0.208367	0.260068
Proteobacteria	Gammaproteobacteria	Enterobacteriales	Enterobacteriaceae	sf_1	9417	AJ233429.1	Serratia fonticola str. DSM 4576	0.00399431	0.0178343	961.6	0.25177	0.346878	0.320126
Acidobacteria	Acidobacteria-6	Unclassified	Unclassified	sf_1	53	Z95728.1	Holophaga/Acidobacterium phylum clone iii1-15	0.004012	0.0178343	547.6	0.551209	0.0268881	0.127664
Proteobacteria	Gammaproteobacteria	Acidithiobacillales	Acidithiobacillaceae	sf_1	8552	AJ278723.1	Acidithiobacillus ferrooxidans str. D2	0.00401806	0.0178343	644.4	0.543323	0.0296209	0.12859
Actinobacteria	Actinobacteria	Actinomycetales	Dermabacteraceae	sf_1	1446	AJ537574.1	Brachybacterium muris str. C3H-21	0.0040249	0.0178343	402.8	0.73987	0.00105098	0.0449168
Proteobacteria	Alphaproteobacteria	Rhizobiales	Unclassified	sf_1	6726			0.00403487	0.0178343	814.4	0.474335	0.0634058	0.165114
Proteobacteria	Gammaproteobacteria	Enterobacteriales	Enterobacteriaceae	sf_1	9265	AY253919.1	Rahnella aquatilis k 8	0.00404184	0.0178343	836.2	0.22576	0.400503	0.343587
Proteobacteria	Gammaproteobacteria	Enterobacteriales	Enterobacteriaceae	sf_1	8711	AJ233432.1	Serratia odorifera str. DSM 4582	0.00405177	0.0178343	739.8	0.220635	0.411564	0.34766
Proteobacteria	Gammaproteobacteria	Alteromonadales	Alteromonadaceae	sf_1	9586	AY190533.1	Shewanella gaetbuli str. TF-27	0.00414343	0.0181369	560.6	0.291283	0.273704	0.292556
Proteobacteria	Gammaproteobacteria	Pseudomonadales	Pseudomonadaceae	sf_1	8852	AF063219.1	Pseudomonas stutzeri str. KC	0.00418002	0.0181966	693	0.457594	0.0747126	0.176156
Proteobacteria	Gammaproteobacteria	Alteromonadales	Alteromonadaceae	sf_1	8695	AF468296.1	Arctic pack ice; northern Fram Strait; 80 31.1 N; 01 deg 59.7 min E clone ARKIA-34	0.00422673	0.0182343	605.4	0.459691	0.0732211	0.174957
Proteobacteria	Gammaproteobacteria	Pseudomonadales	Pseudomonadaceae	sf_1	8777	AB095005.1	Pseudomonas sp. str. KNA6-5	0.00424332	0.0182343	627.8	0.487211	0.0556037	0.155627
Proteobacteria	Betaproteobacteria	Burkholderiales	Oxalobacteraceae	sf_1	7878	AY250094.1	napthalene-contaminated sediment clone 29	0.00425773	0.0182343	761	0.531035	0.0342952	0.134106
Proteobacteria	Betaproteobacteria	Burkholderiales	Ralstoniaceae	sf_1	7761	AF280433.1	Ralstonia detusculanense str. APF11	0.00429908	0.0183124	755.4	0.382501	0.143691	0.226059
Proteobacteria	Gammaproteobacteria	Enterobacteriales	Enterobacteriaceae	sf_1	8770			0.00435268	0.0183976	856	0.24422	0.362006	0.327389
Proteobacteria	Epsilonproteobacteria	Campylobacterales	Helicobacteraceae	sf_3	10467			0.00436552	0.0183976	529.4	0.481241	0.0591271	0.160588
Proteobacteria	Epsilonproteobacteria	Campylobacterales	Helicobacteraceae	sf_3	10520	AJ249858.1	Helicobacter sp. blood isolate 964	0.00446744	0.0186937	604	0.648305	0.00660227	0.0865784
Actinobacteria	Actinobacteria	Actinomycetales	Microbacteriaceae	sf_1	1106			0.00449123	0.0186937	520.4	0.713547	0.00190981	0.0565381
Proteobacteria	Epsilonproteobacteria	Campylobacterales	Helicobacteraceae	sf_3	10507	AB089111.2	termite gut homogenate clone Rs-M59 proteobacterium	0.00450658	0.0186937	524.6	0.487463	0.0554583	0.155627
Proteobacteria	Gammaproteobacteria	Vibrionales	Vibrionaceae	sf_1	8723	AF118021.1	Vibrio calviensis str. RE35F/12	0.00453381	0.0187087	618	0.393528	0.131542	0.21648
Proteobacteria	Gammaproteobacteria	Alteromonadales	Alteromonadaceae	sf_1	8374	AB076560.1	Agarivorans albus str. MKT 89	0.00461752	0.018822	604.4	0.3741	0.153445	0.232936
Proteobacteria	Gammaproteobacteria	Enterobacteriales	Enterobacteriaceae	sf_1	9361	AB004747.1	Enterobacter intermedius str. JCM1238	0.0046338	0.018822	904.6	0.234068	0.382916	0.335022
Bacteroidetes	Bacteroidetes	Bacteroidales	Unclassified	sf_15	6233	AY134906.1	oral periodontitis clone FX069	0.00464226	0.018822	488	0.605879	0.0128609	0.101479
Proteobacteria	Gammaproteobacteria	Enterobacteriales	Enterobacteriaceae	sf_1	8739	AJ233427.1	Serratia entomophila str. DSM 12358	0.0046599	0.018822	795.8	0.222395	0.407748	0.346563
Proteobacteria	Epsilonproteobacteria	Campylobacterales	Unclassified	sf_1	10530	AY672531.1	hydrothermal vent 9 degrees North East Rise Pacific Ocean clone CH5_6_BAC_16SrRNA_9N_EPR	0.00470699	0.018822	692.2	0.458848	0.0738178	0.175242
Actinobacteria	Actinobacteria	Actinomycetales	Micromonosporaceae	sf_1	2051	D85479.1	Couchioplanes subsp. caeruleus str. IFO13939	0.00471001	0.018822	823.4	0.702081	0.00242952	0.0584775
Proteobacteria	Gammaproteobacteria	Enterobacteriales	Enterobacteriaceae	sf_1	9262	AJ871363.1	Yersinia aldovae str. A125	0.00474156	0.018822	760.8	0.235675	0.379563	0.333635
Actinobacteria	Actinobacteria	Actinomycetales	Acidothermaceae	sf_1	1399	AJ532700.1	uranium mill tailings clone Gitt-KF-183	0.00475131	0.018822	614.8	0.622383	0.0100322	0.0964431
Verrucomicrobia	Verrucomicrobiae	Verrucomicrobiales	Xiphinematobacteraceae	sf_3	888	AF217462.1	Candidatus Xiphinematobacter brevicolli	0.00485626	0.019142	736.6	0.818014	0.000107946	0.0155372
Proteobacteria	Deltaproteobacteria	Myxococcales	Polyangiaceae	sf_3	10065	AF387628.1	Polyangium cellulosum str. 87-5	0.00490937	0.0191889	470.6	0.448606	0.0813526	0.182741
Proteobacteria	Alphaproteobacteria	Bradyrhizobiales	Bradyrhizobiaceae	sf_1	7353	AY216437.1	temperate estuarine mud clone HC65	0.00493859	0.0191889	761.8	0.608861	0.0123084	0.0989635
Proteobacteria	Gammaproteobacteria	Enterobacteriales	Enterobacteriaceae	sf_1	8934	AF373188.1	Pectobacterium subsp. carotovorum str. E155 subsp.	0.00494081	0.0191889	715.8	0.228056	0.3956	0.342044
Proteobacteria	Betaproteobacteria	Burkholderiales	Burkholderiaceae	sf_1	8059	Y17010.1	Burkholderia caribensis str. MWAP71	0.00496712	0.019197	599.4	0.450896	0.0796222	0.181211
Proteobacteria	Betaproteobacteria	Burkholderiales	Comamonadaceae	sf_1	7965	X72724.1	Anoxobacterium dechloraticum	0.00502933	0.0192043	664.4	0.62065	0.0103037	0.0964431
Actinobacteria	Actinobacteria	Actinomycetales	Streptosporangiaceae	sf_1	1158	X89947.1	Streptosporangium roseum str. DSM43021T	0.00504302	0.0192043	441.4	0.827944	7.5e-05	0.0137609
Acidobacteria	Acidobacteria-6	Unclassified	Unclassified	sf_1	500	Z95717.1	soil clone RB24	0.00506943	0.0192043	452	0.527865	0.0355868	0.135574
Proteobacteria	Betaproteobacteria	Burkholderiales	Burkholderiaceae	sf_1	7771	AB021374.1	Burkholderia glathei str. ATCC 29195T	0.00509937	0.0192043	732.4	0.393038	0.132066	0.21648
Lentisphaerae	Unclassified	Unclassified	Unclassified	sf_5	10330	AF507900.1	Mono lake clone ML635J-58	0.00514088	0.0192043	649.6	0.577738	0.019088	0.112562
Proteobacteria	Gammaproteobacteria	SUP05	Unclassified	sf_1	8965	M99445.1	Bathymodiolus thermophilus gill symbiont	0.0051657	0.0192043	556.6	0.356792	0.174922	0.24471
Proteobacteria	Gammaproteobacteria	Alteromonadales	Alteromonadaceae	sf_1	8916	U91545.1	Shewanella algae str. 43940	0.00520243	0.0192043	695.2	0.309019	0.244185	0.278195
Proteobacteria	Gammaproteobacteria	Enterobacteriales	Enterobacteriaceae	sf_1	9368	AJ233424.1	Pragia fontium str. DSM 5563	0.00521356	0.0192043	419.6	0.300264	0.258497	0.285122
Proteobacteria	Betaproteobacteria	Burkholderiales	Ralstoniaceae	sf_1	7823	AF312022.1	Wautersia basilensis str. DSM 11853	0.00522861	0.0192043	839.6	0.436155	0.0912384	0.191068
Proteobacteria	Deltaproteobacteria	Unclassified	Unclassified	sf_9	9890	AB089106.1	termite gut homogenate clone Rs-K70 proteobacterium	0.00523561	0.0192043	652	0.551304	0.0268564	0.127664
Proteobacteria	Gammaproteobacteria	Enterobacteriales	Enterobacteriaceae	sf_1	8712	AJ233434.1	Serratia proteamaculans str. DSM 4543	0.00523564	0.0192043	852.8	0.237993	0.374754	0.332102
Proteobacteria	Deltaproteobacteria	EB1021 group	Unclassified	sf_4	8169	AF523886.1	forested wetland clone RCP2-54	0.00526702	0.0192304	277	0.622941	0.00994589	0.0964431
Actinobacteria	Actinobacteria	Actinomycetales	Nocardiaceae	sf_1	2048	AF430044.1	Nocardia uniformis str. DSM 43136	0.00536575	0.019501	432.8	0.658263	0.00556562	0.0785985
Acidobacteria	Acidobacteria-6	Unclassified	Unclassified	sf_1	569	Z95724.1	Holophaga/Acidobacterium phylum clone ii3-12	0.00540183	0.0195048	567.4	0.592032	0.0156864	0.108673
Proteobacteria	Betaproteobacteria	Burkholderiales	Oxalobacteraceae	sf_1	8032	AB074523.1	Aquaspirillum arcticum str. IAM 14963	0.00541603	0.0195048	783.6	0.415828	0.109172	0.201098
Proteobacteria	Alphaproteobacteria	Rhizobiales	Unclassified	sf_1	7060			0.0055112	0.0197266	481.8	0.437948	0.0897649	0.19102
Proteobacteria	Betaproteobacteria	Burkholderiales	Oxalobacteraceae	sf_1	7845	AB038368.1	Diaphorina citri symbiont	0.00553853	0.0197266	542.2	0.360018	0.170776	0.243042
Proteobacteria	Gammaproteobacteria	Alteromonadales	Alteromonadaceae	sf_1	9501	AB086226.1	sea water isolate str. BP-PH	0.00556678	0.0197266	559.4	0.361947	0.168328	0.241744
Actinobacteria	Actinobacteria	Actinomycetales	Microbacteriaceae	sf_1	1921	AJ292036.1	Firmicutes isolate str. d8	0.00560397	0.0197266	504	0.659176	0.0054775	0.0783588
Proteobacteria	Gammaproteobacteria	Pseudomonadales	Pseudomonadaceae	sf_1	9068	AF143245.1	Pseudomonas stutzeri str. A1501	0.0056141	0.0197266	560.4	0.394943	0.130036	0.21648
Proteobacteria	Gammaproteobacteria	Enterobacteriales	Enterobacteriaceae	sf_1	8467	AB061685.1	Serratia marcescens subsp. sakuensis str. KRED subsp.	0.00562701	0.0197266	804	0.222058	0.408477	0.346915
Proteobacteria	Gammaproteobacteria	Oceanospirillales	Oceanospirillaceae	sf_1	9351	AF382102.1	bacterioplankton clone ZA2333c	0.00570067	0.0198967	632.4	0.382721	0.143442	0.226059
Proteobacteria	Betaproteobacteria	Nitrosomonadales	Nitrosomonadaceae	sf_1	7858			0.0057778	0.0200199	704.8	0.352178	0.180968	0.246198
Proteobacteria	Betaproteobacteria	Rhodocyclales	Rhodocyclaceae	sf_1	7800	AY013692.1	sample taken upstream landfill clone BVC77 landfill	0.00579466	0.0200199	963	0.344762	0.19097	0.253213
Proteobacteria	Gammaproteobacteria	Acidithiobacillales	Acidithiobacillaceae	sf_1	8320	AF543507.1	acid mine drainage clone BA11	0.00582689	0.0200199	554.2	0.482848	0.0581632	0.159293
Firmicutes	Clostridia	Clostridiales	Unclassified	sf_17	2324			0.00583703	0.0200199	829.4	0.677641	0.00392162	0.0696739
Actinobacteria	Actinobacteria	Actinomycetales	Kineosporiaceae	sf_1	1581	AJ293746.1	Cryptosporangium aurantiacum str. IMSNU 22120	0.00597038	0.020389	471	0.655967	0.00579224	0.0797539
Acidobacteria	Acidobacteria	Acidobacteriales	Acidobacteriaceae	sf_6	6423	AF523979.1	coal effluent wetland clone FW92	0.00599813	0.0203959	652.6	0.367076	0.161934	0.238469
Actinobacteria	Actinobacteria	Actinomycetales	Micromonosporaceae	sf_1	1641	AB196714.1	Micromonospora marina str. JSM3-1	0.00604633	0.0204719	714.8	0.706072	0.00223703	0.0584775
Proteobacteria	Gammaproteobacteria	SAR86	Unclassified	sf_1	8962	AF406526.1	bacterioplankton clone AEGEAN_234	0.00607875	0.0204941	395.6	0.618586	0.0106347	0.0964431
Proteobacteria	Gammaproteobacteria	Enterobacteriales	Enterobacteriaceae	sf_1	9290	AF465797.1	Baumannia cicadellinicola	0.00611417	0.0205262	764.8	0.361971	0.168299	0.241744
Actinobacteria	Actinobacteria	Actinomycetales	Micromonosporaceae	sf_1	1633	AJ277585.1	Actinoplanes tuftoflagellus str. IMSNU 22135	0.0061608	0.0205954	502	0.703174	0.00237553	0.0584775
Actinobacteria	Actinobacteria	Actinomycetales	Pseudonocardiaceae	sf_1	1824	AJ293756.1	Amycolatopsis sulphurea str. IMSNU 20060T	0.00621199	0.0206793	847.6	0.710156	0.00205308	0.0565381
Proteobacteria	Gammaproteobacteria	Pseudomonadales	Moraxellaceae	sf_3	8838	AJ748267.1	Psychrobacter psychrophilus CMS 28	0.00626635	0.020773	699.8	0.406825	0.117856	0.208047
Actinobacteria	Actinobacteria	Actinomycetales	Micromonosporaceae	sf_1	1766	X93195.1	Dactylosporangium salmoneum str. DSM 43910	0.00633284	0.0209059	494	0.619967	0.0104123	0.0964431
Proteobacteria	Gammaproteobacteria	Enterobacteriales	Enterobacteriaceae	sf_1	9266	Z14096.1	Parasite BEV of E.variegatus	0.00637568	0.0209387	528.2	0.375012	0.152365	0.232261
Proteobacteria	Gammaproteobacteria	Pseudomonadales	Pseudomonadaceae	sf_1	8725	AJ419674.1	Pseudomonas sp. str. 2N1-1	0.00639561	0.0209387	616.4	0.428912	0.0973685	0.19407
Actinobacteria	Actinobacteria	Unclassified	Unclassified	sf_1	1370	AF523912.1	forested wetland clone RCP1-37	0.00647215	0.0211021	617	0.588941	0.0163784	0.110234
Planctomycetes	Planctomycetacia	Planctomycetales	Anammoxales	sf_4	4695	AF316773.1	Crater Lake clone CL500-15	0.00653298	0.0212131	577	0.720122	0.00165513	0.0565381
TM7	TM7-3	Unclassified	Unclassified	sf_1	2917	AF507686.1	arid soil clone C026	0.00658192	0.0212848	647.4	0.723287	0.00154284	0.0565381
Proteobacteria	Gammaproteobacteria	Enterobacteriales	Enterobacteriaceae	sf_1	9348			0.0066546	0.0214323	580.2	0.269579	0.31264	0.30665
Proteobacteria	Alphaproteobacteria	Bradyrhizobiales	Bradyrhizobiaceae	sf_1	7390	U87781.1	Afipia genosp. 10 str. G8996	0.00677421	0.02165	677.6	0.436448	0.0909964	0.191068
Proteobacteria	Gammaproteobacteria	Oceanospirillales	Halomonadaceae	sf_1	8317	AF211861.1	Chromohalobacter canadensis str. DSM6769	0.00677685	0.02165	600.6	0.495599	0.0509182	0.152887
Proteobacteria	Gammaproteobacteria	GAO cluster	Unclassified	sf_1	9468	AY098900.1	activated sludge clone SBRL2_40	0.00682331	0.0217109	572	0.448784	0.0812172	0.182741
Proteobacteria	Alphaproteobacteria	Rhodobacterales	Rhodobacteraceae	sf_1	7262	AB098590.1	Paracoccus pantotrophus str. TUT1022	0.00692277	0.0219393	415.2	0.472718	0.0644392	0.165845
Firmicutes	Clostridia	Clostridiales	Syntrophomonadaceae	sf_5	2456	AF482440.1	granular sludge clone R4b14	0.00695609	0.021957	544.8	0.496026	0.0506877	0.152887
Proteobacteria	Gammaproteobacteria	Enterobacteriales	Enterobacteriaceae	sf_6	433	AF523903.1	coal effluent wetland clone RCP2-6	0.00701646	0.0220597	554	0.70078	0.00249512	0.0584775
Proteobacteria	Alphaproteobacteria	Rickettsiales	Anaplasmataceae	sf_3	6628	U23709.1	Wolbachia pipientis	0.00708069	0.0221736	563.8	0.775569	0.000414824	0.0285588
Actinobacteria	Actinobacteria	Actinomycetales	Streptomycetaceae	sf_1	1639	X60514.1	Streptomyces coelicolor str. M145 ssp. A3(2)	0.0073143	0.0228107	290.8	0.662097	0.00520308	0.0783588
Actinobacteria	Actinobacteria	Actinomycetales	Nocardiaceae	sf_1	1146	AF430068.1	Nocardia otitidiscaviarum str. S639	0.00734171	0.0228107	616	0.712459	0.00195485	0.0565381
Actinobacteria	Actinobacteria	Actinomycetales	Nocardiaceae	sf_1	1177	Z36929.1	Nocardia carnea str. DSM 43397()	0.00739004	0.0228712	240	0.685774	0.00336038	0.0665068
Actinobacteria	Actinobacteria	Actinomycetales	Unclassified	sf_3	1130	X94155.2	Georgenia muralis str. 1A-C	0.00744185	0.0229419	861.2	0.777084	0.000397351	0.0285588
Proteobacteria	Betaproteobacteria	Burkholderiales	Alcaligenaceae	sf_1	8062	AJ277742.1	Brackiella oedipodis str. LMG 1945 R8846	0.00756324	0.0232199	769.6	0.494417	0.0515602	0.153008
Proteobacteria	Gammaproteobacteria	Alteromonadales	Alteromonadaceae	sf_1	9247	AF500078.1	Shewanella japonica KMM 3577	0.0075916	0.0232199	571.6	0.349741	0.184216	0.248626
Proteobacteria	Gammaproteobacteria	Xanthomonadales	Xanthomonadaceae	sf_3	9286	AJ131912.1	Stenotrophomonas maltophilia str. LMG 11104	0.00761995	0.0232199	697	0.381041	0.145354	0.227109
Proteobacteria	Betaproteobacteria	Burkholderiales	Oxalobacteraceae	sf_1	7921	AY593479.1	Collimonas fungivorans str. Ter331	0.00764984	0.0232217	864.2	0.342512	0.194074	0.253948
Proteobacteria	Gammaproteobacteria	Enterobacteriales	Enterobacteriaceae	sf_1	9252	AF130971.1	Pantoea cedenensis str. A34	0.00769836	0.0232723	849	0.391278	0.133962	0.217644
Proteobacteria	Gammaproteobacteria	Pseudomonadales	Pseudomonadaceae	sf_1	9238			0.00773525	0.0232723	699.4	0.515923	0.0407857	0.141942
Acidobacteria	Acidobacteria	Acidobacteriales	Acidobacteriaceae	sf_6	6359	AF529322.1	PCE-contaminated site clone CLi114	0.00775462	0.0232723	712	0.557659	0.0247998	0.122231
Proteobacteria	Gammaproteobacteria	Oceanospirillales	Halomonadaceae	sf_1	8562	AB085649.1	Halomonas sp. str. TNB I20	0.00778514	0.0232757	715	0.530479	0.034519	0.134106
Proteobacteria	Alphaproteobacteria	Rhodobacterales	Rhodobacteraceae	sf_1	6701	AF245632.1	Roseobacter clone NAC11-3	0.00786683	0.0233706	331.8	0.448964	0.0810805	0.182741
Proteobacteria	Betaproteobacteria	Burkholderiales	Oxalobacteraceae	sf_1	8013	AF236013.1	isolate str. A1020	0.00789567	0.0233706	664.2	0.514592	0.0413986	0.141942
Proteobacteria	Alphaproteobacteria	Bradyrhizobiales	Unclassified	sf_1	7264	AF508112.1	Bosea thiooxidans TJ1	0.00790537	0.0233706	590.4	0.554753	0.0257248	0.123741
Firmicutes	Clostridia	Clostridiales	Unclassified	sf_17	3476			0.00799346	0.0234826	814	0.684841	0.00342125	0.0665068
Proteobacteria	Epsilonproteobacteria	Campylobacterales	Campylobacteraceae	sf_3	10538	L14624.1	Arcobacter cryaerophilus	0.00800253	0.0234826	738.2	0.52243	0.0378867	0.135933
Proteobacteria	Gammaproteobacteria	Unclassified	Unclassified	sf_3	9105			0.00804775	0.0235281	998.8	0.547192	0.0282549	0.128555
Proteobacteria	Gammaproteobacteria	Chromatiales	Chromatiaceae	sf_1	8697	AJ401211.1	Thiococcus sp. AT2204	0.00809656	0.0235439	571.6	0.512746	0.04226	0.141942
Proteobacteria	Betaproteobacteria	Burkholderiales	Burkholderiaceae	sf_1	8097	AB091761.1	Burkholderia cepacia	0.00812328	0.0235439	530	0.330238	0.211587	0.260068
Actinobacteria	Actinobacteria	Actinomycetales	Micromonosporaceae	sf_1	1159	AJ277568.1	Actinoplanes durhamensis str. IMSNU 22124T	0.0081423	0.0235439	939.2	0.749196	0.000836434	0.0427387
Proteobacteria	Betaproteobacteria	Burkholderiales	Alcaligenaceae	sf_1	7737	AY081977.1	atrazine-catabolizing microbial presence methanol clone KRA30+06A	0.00833735	0.0239004	654.8	0.446283	0.0831359	0.184151
Proteobacteria	Epsilonproteobacteria	Campylobacterales	Helicobacteraceae	sf_3	10385			0.00835608	0.0239004	781.4	0.593299	0.0154093	0.108673
Proteobacteria	Epsilonproteobacteria	Campylobacterales	Helicobacteraceae	sf_3	10451	AF506779.1	Helicobacter heilmannii str. C4S	0.00835608	0.0239004	781.4	0.593299	0.0154093	0.108673
OP3	Unclassified	Unclassified	Unclassified	sf_4	628	AY050598.1	CB-contaminated groundwater clone GOUTB15	0.00842166	0.023992	750.4	0.68502	0.00340949	0.0665068
Proteobacteria	Gammaproteobacteria	Alteromonadales	Alteromonadaceae	sf_1	9292			0.00847063	0.023992	778	0.272736	0.306785	0.306105
Acidobacteria	Acidobacteria-10	Unclassified	Unclassified	sf_1	516	AJ532721.1	uranium mining waste pile clone JG34-KF-153	0.00847894	0.023992	574.2	0.492043	0.0528674	0.153686
Proteobacteria	Gammaproteobacteria	Vibrionales	Vibrionaceae	sf_1	9525			0.0085842	0.0241472	436.6	0.424496	0.101246	0.196348
Proteobacteria	Epsilonproteobacteria	Campylobacterales	Helicobacteraceae	sf_3	10436	AF297868.1	Helicobacter aurati str. MIT 97-5075c	0.00863888	0.0241472	664	0.529043	0.0351025	0.135197
Actinobacteria	Actinobacteria	Acidimicrobiales	Acidimicrobiaceae	sf_1	1791	AY221045.1	Mammoth cave clone CCM13a	0.0086398	0.0241472	998.8	0.752839	0.000763058	0.0427387
Proteobacteria	Gammaproteobacteria	Alteromonadales	Alteromonadaceae	sf_1	9222	X82132.1	Shewanella hanedai str. CIP 103207T	0.0086701	0.0241472	653.8	0.282723	0.288691	0.297754
Proteobacteria	Gammaproteobacteria	Alteromonadales	Alteromonadaceae	sf_1	8520	AB059262.1	Moritella sp. str. PS10-13	0.00868618	0.0241472	481	0.326097	0.217717	0.264996
Proteobacteria	Alphaproteobacteria	Rhodobacterales	Rhodobacteraceae	sf_1	7263			0.00894229	0.0247722	806	0.306046	0.248989	0.281173
Proteobacteria	Gammaproteobacteria	Enterobacteriales	Enterobacteriaceae	sf_1	8225			0.00906699	0.0250301	617.4	0.385147	0.140709	0.223739
Proteobacteria	Betaproteobacteria	Burkholderiales	Burkholderiaceae	sf_1	8068	X67039.1	Burkholderia caryophylli str. ATCC 25418	0.00910853	0.0250575	526.4	0.420545	0.104807	0.198705
Proteobacteria	Gammaproteobacteria	Alteromonadales	Alteromonadaceae	sf_1	8578	AY147906.1	Marinobacter lipolyticus str. SM-19	0.00924374	0.0251847	594.6	0.565254	0.0225032	0.122181
NC10	Unclassified	Unclassified	Unclassified	sf_1	2516	AF529103.1	TCE-contaminated site clone FTL22	0.00924974	0.0251847	552.2	0.499342	0.0489246	0.151381
Proteobacteria	Gammaproteobacteria	Chromatiales	Chromatiaceae	sf_1	8546	AJ242772.1	Thiocapsa litoralis	0.00927834	0.0251847	633	0.487104	0.0556654	0.155627
Proteobacteria	Alphaproteobacteria	Bradyrhizobiales	Beijerinck/Rhodoplan/Methylocyst	sf_3	7153	AJ563928.1	Methylocella tundrae str. Y1	0.0092819	0.0251847	565	0.711117	0.00201161	0.0565381
Proteobacteria	Gammaproteobacteria	Alteromonadales	Alteromonadaceae	sf_1	9227			0.00939379	0.025326	802.8	0.376672	0.150412	0.231142
Firmicutes	Bacilli	Lactobacillales	Lactobacillaceae	sf_1	3669	AF000163.1	Lactobacillus manihotivorans str. YAM I; LMG 18011	0.00939792	0.025326	385.2	0.379993	0.146558	0.227697
Proteobacteria	Gammaproteobacteria	Legionellales	Legionellaceae	sf_1	8865	AF468229.1	Arctic pack ice; northern Fram Strait; 80 31.1 N; 01 deg 59.7 min E clone ARKCH2Br2-23	0.00952609	0.0255844	621.4	0.533381	0.0333624	0.134106
Proteobacteria	Gammaproteobacteria	Enterobacteriales	Enterobacteriaceae	sf_1	8173	Z76752.1	Photorhabdus asymbiotica str. ATCC 43949	0.00963424	0.0257276	485.4	0.370194	0.158128	0.2357
Actinobacteria	Actinobacteria	Actinomycetales	Micromonosporaceae	sf_1	1615	AB036999.1	Actinoplanes derwentensis str. IFO 14935T	0.00964438	0.0257276	740	0.729513	0.00133996	0.0527145
WS5	Unclassified	Unclassified	Unclassified	sf_2	8119	AF419661.1	Guaymas Basin hydrothermal sediment clone a2b013	0.00972657	0.0258598	594.6	0.557315	0.0249079	0.122231
Acidobacteria	Acidobacteria	Acidobacteriales	Acidobacteriaceae	sf_16	6414	AF529350.1	PCE-contaminated site clone CLs73	0.00980266	0.0259125	394	0.38752	0.13807	0.22138
Proteobacteria	Gammaproteobacteria	Symbionts	Unclassified	sf_1	9128	X95229.1	Lucina nassula gill symbiont	0.00981252	0.0259125	650.4	0.419575	0.105695	0.199701
Proteobacteria	Gammaproteobacteria	Unclassified	Unclassified	sf_3	8522			0.00984449	0.0259125	248.6	0.544372	0.0292459	0.128555
Actinobacteria	Actinobacteria	Actinomycetales	Gordoniaceae	sf_1	1654	AF416719.1	Gordonia polyisoprenivorans str. Y2K	0.00989193	0.0259469	193.6	0.546952	0.0283382	0.128555
OP3	Unclassified	Unclassified	Unclassified	sf_2	349	AJ390463.1	soil clone PBS-25	0.00993427	0.0259469	726.8	0.788162	0.000287096	0.0243265
Actinobacteria	Actinobacteria	Actinomycetales	Frankiaceae	sf_1	1286	AJ408875.1	Frankia sp. Sn5-8	0.00995581	0.0259469	659	0.68221	0.00359771	0.0665068
Actinobacteria	Actinobacteria	Actinomycetales	Micrococcaceae	sf_1	1582	AY053487.1	gas hydrate clone AT425_EubD11	0.0100722	0.0261643	550.6	0.629263	0.00900919	0.0963483
Proteobacteria	Gammaproteobacteria	Legionellales	Coxiellaceae	sf_3	9444	AF523974.1	forested wetland clone FW23	0.0102398	0.0265125	524.2	0.48864	0.0547835	0.15553
Bacteroidetes	Sphingobacteria	Sphingobacteriales	Flexibacteraceae	sf_19	5566	AY264838.1	Hongiella mannitolivorans str. IMSNU 14012 JC2050	0.010346	0.0267002	421.8	0.612192	0.0117134	0.0964431
Actinobacteria	Actinobacteria	Actinomycetales	Microbacteriaceae	sf_1	1705			0.0103823	0.0267012	369.8	0.613486	0.0114885	0.0964431
Acidobacteria	Acidobacteria	Acidobacteriales	Acidobacteriaceae	sf_14	964	AJ519392.1	uranium mining waste pile clone JG37-AG-145 sp.	0.0104305	0.0267012	596	0.644975	0.00698121	0.0865969
Proteobacteria	Gammaproteobacteria	Legionellales	Coxiellaceae	sf_3	8969	AJ536861.1	uranium mining waste pile soil sample clone JG30-KF-C15 proteobacterium	0.0104648	0.0267012	598.2	0.451146	0.0794347	0.181211
Proteobacteria	Gammaproteobacteria	Pseudomonadales	Pseudomonadaceae	sf_1	8344	AF425998.1	Anabaena circinalis AWQC118C isolate str. UNSW3	0.0104812	0.0267012	704.4	0.512815	0.0422277	0.141942
Planctomycetes	Planctomycetacia	WPS-1	Unclassified	sf_1	4897	AY093476.1	deep marine sediment clone MB-C2-105	0.0106201	0.0268704	572.8	0.600812	0.0138443	0.104451
Proteobacteria	Gammaproteobacteria	SUP05	Unclassified	sf_1	8605	AF382104.1	bacterioplankton clone ZA2525c	0.0106262	0.0268704	836.8	0.352213	0.180922	0.246198
Actinobacteria	Actinobacteria	Actinomycetales	Dermatophilaceae	sf_1	1852	AB096085.1	Tonsillophilus suis str. HT1-19	0.0106832	0.0268704	668.2	0.71063	0.00203252	0.0565381
Actinobacteria	Actinobacteria	Actinomycetales	Streptomycetaceae	sf_1	1340	Y00411.1	Streptomyces coelicolor	0.0106832	0.0268704	259.8	0.672537	0.00431073	0.0719453
Actinobacteria	Actinobacteria	Acidimicrobiales	Acidimicrobiaceae	sf_1	2031	AF523909.1	forested wetland clone RCP1-83	0.0107934	0.026978	590.8	0.645101	0.00696654	0.0865969
Proteobacteria	Gammaproteobacteria	Enterobacteriales	Enterobacteriaceae	sf_1	8892	U93263.1	Aranicola proteolyticus	0.0107941	0.026978	867	0.232615	0.38596	0.336616
Actinobacteria	Actinobacteria	Actinomycetales	Mycobacteriaceae	sf_1	2034	X79094.1	Mycobacterium chlorophenolicum str. PCP-I	0.0109193	0.0271803	420.4	0.501086	0.0480161	0.149833
Proteobacteria	Betaproteobacteria	Burkholderiales	Ralstoniaceae	sf_1	8110	AF085226.1	Wautersia paucula str. LMG 3413	0.0109436	0.0271803	756.4	0.394746	0.130245	0.21648
Bacteroidetes	Flavobacteria	Flavobacteriales	Flavobacteriaceae	sf_1	5462	AF433174.1	Flavobacterium omnivorum str. AS 1.2747; JCM 11313	0.0110262	0.027195	388	0.441828	0.0866337	0.187933
Proteobacteria	Gammaproteobacteria	Oceanospirillales	Alcanivoraceae	sf_1	9658	AB053127.1	Alcanivorax sp. str. Haw1	0.0110688	0.027195	416	0.29804	0.262212	0.287112
Acidobacteria	Acidobacteria-6	Unclassified	Unclassified	sf_1	37	AY214904.2	soil clone BAC-14A1	0.0111204	0.027195	535.8	0.530643	0.0344528	0.134106
Actinobacteria	Actinobacteria	Actinomycetales	Microbacteriaceae	sf_1	1135	AJ459101.1	Rhodoglobus vestalii str. LV3	0.0111366	0.027195	524.2	0.694141	0.0028524	0.0622697
Proteobacteria	Gammaproteobacteria	Alteromonadales	Alteromonadaceae	sf_1	8196			0.0111469	0.027195	629.6	0.520265	0.0388332	0.137543
Actinobacteria	Actinobacteria	Actinomycetales	Streptosporangiaceae	sf_1	1189	AF191734.1	Streptosporangium subroseum str. 7113	0.011156	0.027195	278.8	0.682666	0.00356667	0.0665068
Firmicutes	Bacilli	Lactobacillales	Lactobacillaceae	sf_1	3490	AY675248.1	Lactobacillus suntoryeus str. LH	0.0111899	0.027195	778.4	0.486302	0.0561299	0.155986
Proteobacteria	Gammaproteobacteria	Enterobacteriales	Enterobacteriaceae	sf_1	8642	AF373202.1	Erwinia chrysanthemi str. 580	0.0114336	0.0277025	642	0.217775	0.417806	0.349747
Proteobacteria	Gammaproteobacteria	Enterobacteriales	Enterobacteriaceae	sf_1	8690	AY223838.1	Serratia marcescens str. ost 3	0.0115126	0.0278087	557.8	0.195503	0.468067	0.373615
Spirochaetes	Spirochaetes	Spirochaetales	Spirochaetaceae	sf_1	6573	AB084955.1	termite gut clone NkS7	0.011594	0.0279108	358.8	0.539722	0.0309371	0.130904
Actinobacteria	Actinobacteria	Actinomycetales	Micromonosporaceae	sf_1	1689	AB047516.1	Actinoplanes yunnanensis str. IFO 14459T	0.0116253	0.0279108	639.2	0.67862	0.00385033	0.0695286
Actinobacteria	Actinobacteria	Actinomycetales	Streptosporangiaceae	sf_1	1190	U48977.1	Nonomuraea polychroma str. IFO 14345	0.0117656	0.0280974	522	0.792038	0.000255106	0.0243265
Proteobacteria	Deltaproteobacteria	Myxococcales	Polyangiaceae	sf_3	9874	AJ532714.1	uranium mining waste pile clone JG34-KF-243 proteobacterium	0.0118274	0.0280974	395.6	0.277721	0.297672	0.302808
Proteobacteria	Gammaproteobacteria	Xanthomonadales	Xanthomonadaceae	sf_3	9332	AY096032.1	wetland ecosystem constructed to remediate mine drainage isolate str. WJ2 WJ2	0.0118338	0.0280974	765	0.560332	0.0239721	0.122181
Firmicutes	Symbiobacteria	Symbiobacterales	Unclassified	sf_1	2388	AF465653.1	G+C Gram-positive clone YNPRH70A	0.0118484	0.0280974	595.2	0.43507	0.0921391	0.19186
Actinobacteria	Actinobacteria	Actinomycetales	Nocardiaceae	sf_1	1788	U20791.1	Rhodococcus species	0.0118803	0.0280974	271	0.526866	0.0360014	0.135574
Proteobacteria	Deltaproteobacteria	Desulfovibrionales	Unclassified	sf_1	9828	AB089109.1	termite gut homogenate clone Rs-M89 proteobacterium	0.0121305	0.0284935	697.2	0.605685	0.0128976	0.101479
Proteobacteria	Epsilonproteobacteria	Campylobacterales	Unclassified	sf_1	10427	AY672515.1	hydrothermal vent 9 degrees North East Rise Pacific Ocean clone CH3_17_BAC_16SrRNA_9N_EPR	0.0121414	0.0284935	681.2	0.416946	0.108127	0.200871
Actinobacteria	Actinobacteria	Bifidobacteriales	Bifidobacteriaceae	sf_1	1444	AY278612.1	Bifidobacteriaceae genomosp. C1	0.0121557	0.0284935	610.4	0.643508	0.00715352	0.0865969
Proteobacteria	Deltaproteobacteria	Desulfovibrionales	Desulfovibrionaceae	sf_1	9709	AB089104.1	termite gut homogenate clone Rs-N31 proteobacterium	0.0122152	0.0285452	669.8	0.612818	0.0116042	0.0964431
Proteobacteria	Gammaproteobacteria	Pseudomonadales	Pseudomonadaceae	sf_1	8553	AB046997.1	Pseudomonas fulva str. IAM 1587	0.0122498	0.0285452	604.6	0.57797	0.0190287	0.112562
Verrucomicrobia	Verrucomicrobiae	Verrucomicrobiales	Verrucomicrobia subdivision 5	sf_1	885	AJ390455.1	soil clone PBS-III-26	0.0122895	0.0285536	646	0.816764	0.000112841	0.0155372
Gemmatimonadetes	Unclassified	Unclassified	Unclassified	sf_5	1565	AJ532728.1	uranium mining waste pile clone JG34-KF-418	0.0124052	0.028632	404.4	0.512591	0.0423332	0.141942
Chloroflexi	Anaerolineae	Chloroflexi-1b	Unclassified	sf_1	1071	AJ412677.1	denitrifying reactor clone 131	0.0124296	0.028632	612.2	0.682006	0.0036117	0.0665068
Proteobacteria	Gammaproteobacteria	Alteromonadales	Alteromonadaceae	sf_1	9416	AF539786.1	marine isolate str. R8	0.0124316	0.028632	516.4	0.367433	0.161495	0.23814
Acidobacteria	Acidobacteria	Acidobacteriales	Acidobacteriaceae	sf_14	89	AJ519368.1	uranium mining waste pile clone JG37-AG-31 sp.	0.0124754	0.0286494	492	0.493117	0.0522726	0.153588
Actinobacteria	Actinobacteria	Actinomycetales	Micromonosporaceae	sf_1	1931	X80823.1	Actinoplanes utahensis str. ATCC 31044	0.0126616	0.0288599	550.6	0.665824	0.00486903	0.0755405
Proteobacteria	Epsilonproteobacteria	Campylobacterales	Helicobacteraceae	sf_23	10443	U00679.1	Helicobacter pylori str. 85D08	0.0127181	0.0288599	516.4	0.549067	0.0276104	0.128555
Proteobacteria	Epsilonproteobacteria	Campylobacterales	Helicobacteraceae	sf_3	10576	AF142585.1	Helicobacter sp. 'liver 3' str. liver 3	0.0127181	0.0288599	516.4	0.549067	0.0276104	0.128555
Actinobacteria	Actinobacteria	Actinomycetales	Micrococcaceae	sf_1	1966	AY133106.1	TCE-contaminated site clone ccspost2208	0.0127349	0.0288599	608	0.670714	0.00445701	0.0727504
Proteobacteria	Gammaproteobacteria	Alteromonadales	Alteromonadaceae	sf_1	9148	AF172988.1	Pseudoalteromonas ulvae str. UL13	0.0127491	0.0288599	634	0.433502	0.0934509	0.193198
Firmicutes	Clostridia	Clostridiales	Peptococc/Acidaminococc	sf_11	39	AF523919.1	forested wetland clone RCP2-71	0.0128382	0.0289787	428	0.0643703	0.812781	0.506966
Firmicutes	Bacilli	Lactobacillales	Lactobacillaceae	sf_1	3703	AY389803.1	Lactobacillus salivarius str. RA2115	0.0129165	0.0290726	624.4	0.495352	0.0510515	0.152887
Proteobacteria	Epsilonproteobacteria	Campylobacterales	Helicobacteraceae	sf_3	10430	AF506783.1	Helicobacter heilmannii str. MM2	0.0129784	0.0291292	643.2	0.543238	0.0296513	0.12859
Synergistes	Unclassified	Unclassified	Unclassified	sf_3	719	AY207056.1	Synergistes sp. P1 str. P4G_18	0.0131493	0.0294295	686.6	0.592428	0.0155993	0.108673
Proteobacteria	Deltaproteobacteria	Desulfobacterales	Desulfobulbaceae	sf_1	10047	AY355301.1	epibiontic clone C11-D3	0.0131897	0.0294366	534.4	0.619668	0.0104601	0.0964431
Proteobacteria	Gammaproteobacteria	Alteromonadales	Alteromonadaceae	sf_1	8348	AF468388.1	Arctic sea ice ARK10038	0.01335	0.0297107	639	0.352523	0.180511	0.246198
Proteobacteria	Gammaproteobacteria	GAO cluster	Unclassified	sf_1	9008	AF361092.1	activated sludge clone SBRQ157	0.0134491	0.0298273	588.4	0.492023	0.0528783	0.153686
Proteobacteria	Alphaproteobacteria	Bradyrhizobiales	Bradyrhizobiaceae	sf_1	7044	U87765.1	Afipia genosp. 2 str. G4438	0.0135025	0.0298273	355.4	0.263228	0.324614	0.310392
Proteobacteria	Gammaproteobacteria	SUP05	Unclassified	sf_1	8953	AF354606.1	marine clone Arctic96BD-19	0.0135153	0.0298273	523.2	0.40338	0.121302	0.212091
Proteobacteria	Alphaproteobacteria	Rhodobacterales	Rhodobacteraceae	sf_1	7026	AY005463.1	Leisingera methylohalidivorans str. MB2	0.0135675	0.0298592	264.2	0.373165	0.154557	0.232936
Acidobacteria	Acidobacteria-6	Unclassified	Unclassified	sf_1	834	AF280856.1	bioreactor clone mle1-25	0.0139251	0.0305614	583.4	0.556645	0.0251196	0.122231
Acidobacteria	Acidobacteria	Acidobacteriales	Acidobacteriaceae	sf_14	582	AY102321.1	heavy metal-contaminated soil clone a13114	0.0141315	0.030748	416.2	0.49421	0.0516728	0.153008
Proteobacteria	Deltaproteobacteria	Desulfovibrionales	Desulfomicrobiaceae	sf_1	10079	AJ277896.1	Desulfomicrobium baculatum str. DSM 1742	0.014156	0.030748	520.6	0.573423	0.0202196	0.114806
Unclassified	Unclassified	Unclassified	Unclassified	sf_140	6355			0.0141822	0.030748	680.8	0.538754	0.0312983	0.131588
Actinobacteria	Actinobacteria	Actinomycetales	Streptomycetaceae	sf_1	1569	D63871.1	Streptomyces sampsonii str. ATCC25495	0.0141825	0.030748	256.2	0.615525	0.011141	0.0964431
Proteobacteria	Gammaproteobacteria	Alteromonadales	Pseudoalteromonadaceae	sf_1	9627	AF218245.1	Pseudoalteromonas sp	0.0142041	0.030748	464	0.378252	0.14857	0.230174
Actinobacteria	Actinobacteria	Actinomycetales	Unclassified	sf_3	2045	AF507852.1	hypersaline lake clone ML602J-44	0.014254	0.0307654	754.4	0.598954	0.0142191	0.105829
Acidobacteria	Acidobacteria-6	Unclassified	Unclassified	sf_1	13	AJ534637.1	soil sample uranium mining waste pile near town Johanngeorgenstadt clone JG36-TzT-202 bacterium	0.0143029	0.0307654	483.8	0.522674	0.037781	0.135933
Proteobacteria	Gammaproteobacteria	Pseudomonadales	Pseudomonadaceae	sf_1	8508	AF530073.1	Pseudomonas citronellolis str. TERIDB26	0.0143721	0.0307654	842.8	0.276853	0.299247	0.303806
Lentisphaerae	Unclassified	Unclassified	Unclassified	sf_5	9704	AJ431235.1	Cytophaga sp. str. Dex80-64	0.0143896	0.0307654	380.2	0.332251	0.208648	0.260068
Proteobacteria	Betaproteobacteria	Burkholderiales	Oxalobacteraceae	sf_1	7968	U49757.2	Oxalobacter formigenes str. OXB ovinen rumen	0.0144064	0.0307654	692	0.377074	0.149942	0.23107
Proteobacteria	Unclassified	Unclassified	Unclassified	sf_8	8247			0.0145698	0.0310307	610.4	0.356427	0.175396	0.244871
Nitrospira	Nitrospira	Nitrospirales	Nitrospiraceae	sf_2	544	AF524004.1	forested wetland clone FW5	0.0148798	0.031606	366	0.564511	0.0227203	0.122181
Proteobacteria	Alphaproteobacteria	Rhizobiales	Phyllobacteriaceae	sf_1	7300	AY007683.1	marine isolate JP57	0.0149787	0.0316931	544.2	0.271966	0.308206	0.306178
Actinobacteria	Actinobacteria	Actinomycetales	Micromonosporaceae	sf_1	1760	AJ277583.1	Actinoplanes roseosporangius str. IMSNU 22133	0.0150008	0.0316931	706.6	0.71087	0.0020222	0.0565381
Actinobacteria	Actinobacteria	Actinomycetales	Micromonosporaceae	sf_1	1910	AB013495.2	Actinoplanes capillaceus str. K95-5561	0.015219	0.0319494	766.2	0.70839	0.00213105	0.0572539
Chloroflexi	Anaerolineae	Chloroflexi-1f	Unclassified	sf_1	765	AJ278167.1	anaerobic bioreactor clone SHD-71	0.0152375	0.0319494	479	0.615945	0.0110704	0.0964431
Spirochaetes	Spirochaetes	Spirochaetales	Spirochaetaceae	sf_1	6523	AB088912.1	termite gut homogenate clone Rs-J64 sp.	0.0152431	0.0319494	342.8	0.515738	0.0408705	0.141942
Proteobacteria	Gammaproteobacteria	Alteromonadales	Alteromonadaceae	sf_1	9491	AF505729.1	Boston Harbor surface water isolate str. UMB6D UMB6D	0.015526	0.0323821	418.8	0.236948	0.376918	0.333294
Proteobacteria	Epsilonproteobacteria	Campylobacterales	Helicobacteraceae	sf_3	10448	U51870.1	Helicobacter felis str. Dog-1	0.0155462	0.0323821	789.6	0.58184	0.0180584	0.111264
Proteobacteria	Alphaproteobacteria	Caulobacterales	Caulobacteraceae	sf_1	6781	AB023784.1	Brevundimonas intermedia str. MBIC2712 ATCC15262	0.0156644	0.0323821	614	0.355071	0.177161	0.245469
Actinobacteria	Actinobacteria	Actinomycetales	Nocardiaceae	sf_1	1769	AF430064.1	Nocardia sp. str. DSM 46067	0.0156795	0.0323821	340.8	0.602974	0.0134176	0.102638
Bacteroidetes	Flavobacteria	Flavobacteriales	Flavobacteriaceae	sf_1	5482			0.0157127	0.0323821	360.8	0.390378	0.134937	0.218586
Actinobacteria	Actinobacteria	Actinomycetales	Micromonosporaceae	sf_1	1488	AJ277574.1	Actinoplanes utahensis str. IMSNU 20044T	0.0157547	0.0323821	756.4	0.713529	0.00191055	0.0565381
Proteobacteria	Gammaproteobacteria	Enterobacteriales	Enterobacteriaceae	sf_1	8182	X07652.1	Proteus vulgaris str. IFAM 1731	0.0157561	0.0323821	925.8	0.342824	0.193642	0.253948
Proteobacteria	Alphaproteobacteria	Unclassified	Unclassified	sf_6	7377	AY192273.1	Rocky Mountain alpine soil clone W2b-8C	0.0158409	0.0323821	566.8	0.539508	0.0310168	0.130904
Proteobacteria	Alphaproteobacteria	Unclassified	Unclassified	sf_6	6694	AF523879.1	forested wetland clone RCP2-92	0.0158467	0.0323821	923.6	0.448369	0.0815327	0.182741
Proteobacteria	Gammaproteobacteria	Alteromonadales	Alteromonadaceae	sf_1	8978	AF468393.1	Arctic sea ice ARK10108	0.0158582	0.0323821	867.8	0.357571	0.173915	0.244459
Proteobacteria	Gammaproteobacteria	Enterobacteriales	Enterobacteriaceae	sf_1	8362	AF453251.1	Klebsiella pneumoniae str. ASR1	0.015958	0.0324377	713.8	0.204569	0.447261	0.363594
Actinobacteria	Actinobacteria	Actinomycetales	Micromonosporaceae	sf_1	1972	AB037011.1	Actinoplanes regularis str. IFO 12514T	0.0159673	0.0324377	691.4	0.701484	0.00245945	0.0584775
Proteobacteria	Betaproteobacteria	Nitrosomonadales	Nitrosomonadaceae	sf_1	7682	AF363291.1	Nitrosovibrio sp. str. RY6A	0.016029	0.0324798	404.4	0.494926	0.0512831	0.153008
Proteobacteria	Gammaproteobacteria	Unclassified	Unclassified	sf_3	9124	AY145601.1	10e-6 dilution marine samples Weser estuary clone DC8-80-1 proteobacterium	0.0161133	0.0325672	496.8	0.40714	0.117543	0.208047
Proteobacteria	Epsilonproteobacteria	Campylobacterales	Unclassified	sf_1	10473	U29081.1	Rimicaris exoculata ectosymbiont	0.0163769	0.032951	565	0.411023	0.113749	0.203736
Proteobacteria	Gammaproteobacteria	Oceanospirillales	Halomonadaceae	sf_1	8854	AY167282.1	Halomonas variabilis str. ANT9112	0.0163864	0.032951	419.4	0.303549	0.253068	0.282147
Proteobacteria	Epsilonproteobacteria	Campylobacterales	Helicobacteraceae	sf_3	10548	AF286052.1	Helicobacter rappini W.Tee-Bat	0.0166531	0.0333454	525.8	0.476561	0.0620028	0.163784
Proteobacteria	Gammaproteobacteria	Xanthomonadales	Xanthomonadaceae	sf_3	8689	AB110496.1	Dyemonas todaii str. XD10	0.0167241	0.0333454	652.6	0.619093	0.0105526	0.0964431
Proteobacteria	Betaproteobacteria	Nitrosomonadales	Nitrosomonadaceae	sf_1	7796	AF080256.1	Nitrosospira sp. str. TYM9	0.0167262	0.0333454	447.6	0.570635	0.0209777	0.117297
Proteobacteria	Gammaproteobacteria	Methylococcales	Methylococcaceae	sf_1	9065	AY094499.1	extracted chamber connected to Ocean Drilling Program site 892b clone 1-27 proteobacterium	0.0167789	0.0333454	619.4	0.46287	0.0710024	0.173223
Proteobacteria	Gammaproteobacteria	SUP05	Unclassified	sf_1	8654	AB099939.1	inactive deep-sea hydrothermal vent chimneys clone IheB2-31	0.0168094	0.0333454	557.6	0.362268	0.167924	0.241744
Actinobacteria	Actinobacteria	Acidimicrobiales	Acidimicrobiaceae	sf_1	1360	AF523917.1	forested wetland clone RCP2-103	0.016835	0.0333454	538.6	0.670296	0.00449106	0.0727504
Proteobacteria	Gammaproteobacteria	Pasteurellales	Pasteurellaceae	sf_1	8228	AF268964.1	Actinobacillus indolicus str. H1419	0.0169241	0.0334382	981.2	0.416502	0.108541	0.200871
Acidobacteria	Acidobacteria	Acidobacteriales	Acidobacteriaceae	sf_14	994	AJ519389.1	uranium mining waste pile clone JG37-AG-117 sp.	0.0170717	0.03359	508.8	0.557585	0.0248232	0.122231
Actinobacteria	Actinobacteria	Actinomycetales	Streptomycetaceae	sf_1	1274	AB006154.1	Trichotomospora caesia str. IFO14562	0.0171434	0.03359	222.4	0.565972	0.0222947	0.122181
Proteobacteria	Gammaproteobacteria	Pseudomonadales	Pseudomonadaceae	sf_1	8708			0.0171464	0.03359	440.4	0.495306	0.0510767	0.152887
Acidobacteria	Acidobacteria-6	Unclassified	Unclassified	sf_1	100	AJ534631.1	soil sample uranium mining waste pile near town Johanngeorgenstadt clone JG36-TzT-10	0.0171705	0.03359	471.2	0.49069	0.0536229	0.154467
Proteobacteria	Unclassified	Unclassified	Unclassified	sf_20	6763			0.0175008	0.0340887	589.8	0.425594	0.100272	0.195154
Proteobacteria	Alphaproteobacteria	Rhodobacterales	Rhodobacteraceae	sf_1	6991	X53853.1	Rhodobacter sphaeroides str. 2.4.1	0.0175115	0.0340887	491.8	0.560392	0.0239537	0.122181
Proteobacteria	Gammaproteobacteria	Alteromonadales	Alteromonadaceae	sf_1	8503	AF468401.1	Arctic sea ice ARK10244	0.0176191	0.0341556	674.2	0.421999	0.103487	0.197906
Proteobacteria	Gammaproteobacteria	Vibrionales	Vibrionaceae	sf_1	8887	X74699.1	Salinivibrio costicola str. ATCC 35508T	0.0176572	0.0341556	437.2	0.587054	0.0168124	0.110234
Proteobacteria	Gammaproteobacteria	Enterobacteriales	Enterobacteriaceae	sf_1	9293	AJ245598.1	USA clone 14/7	0.0176752	0.0341556	750.6	0.314452	0.235557	0.273417
marine group A	mgA-2	Unclassified	Unclassified	sf_1	6344	AF382142.1	bacterioplankton clone ZA3648c	0.017726	0.0341706	442.8	0.747696	0.000868275	0.0427387
Proteobacteria	Gammaproteobacteria	Cardiobacteriales	Cardiobacteriaceae	sf_1	9453	AF506987.1	Cardiobacterium valvarum str. MDA3079	0.0180167	0.0345797	480.6	0.401149	0.12357	0.214267
Proteobacteria	Alphaproteobacteria	Rhodobacterales	Rhodobacteraceae	sf_1	7453	AJ534205.1	Sulfitobacter sp. BIO-11	0.0180256	0.0345797	247.2	0.265357	0.32057	0.308669
Proteobacteria	Deltaproteobacteria	Desulfobacterales	Unclassified	sf_4	9951	AF523973.1	forested wetland clone FW13	0.0181241	0.0346848	509	0.651227	0.00628327	0.0854469
Actinobacteria	Actinobacteria	Actinomycetales	Mycobacteriaceae	sf_1	1239	AJ271863.1	Mycobacterium ratisbonense str. SD4	0.0181805	0.0347089	368.8	0.456975	0.0751566	0.17617
Proteobacteria	Deltaproteobacteria	EB1021 group	Unclassified	sf_4	10024	AF420338.1	hydrothermal sediment clone AF420338	0.0183359	0.0349214	475.2	0.577581	0.0191282	0.112562
Proteobacteria	Gammaproteobacteria	Unclassified	Unclassified	sf_3	9498			0.0185108	0.0351699	336.2	0.478509	0.0607935	0.163037
Firmicutes	Clostridia	Clostridiales	Clostridiaceae	sf_12	206	AB089017.1	termite gut homogenate clone Rs-P50 bacterium	0.0186867	0.0353494	754.8	0.524748	0.0368924	0.135913
Proteobacteria	Gammaproteobacteria	Thiotrichales	Piscirickettsiaceae	sf_3	8664	AJ237758.1	Thiomicrospira sp. str. Milos-T2	0.0187242	0.0353494	500.6	0.302548	0.254715	0.283124
Proteobacteria	Epsilonproteobacteria	Campylobacterales	Helicobacteraceae	sf_3	10518	X67854.1	Helicobacter pylori str. ATCC 49396T	0.0187391	0.0353494	471.2	0.522587	0.0378185	0.135933
Proteobacteria	Gammaproteobacteria	Alteromonadales	Alteromonadaceae	sf_1	9203	AY194066.1	Thalassomonas ganghwensis str. JC2041	0.0187983	0.0353768	426.2	0.330998	0.210474	0.260068
Proteobacteria	Betaproteobacteria	Burkholderiales	Comamonadaceae	sf_1	7986	AF468446.1	Arctic sea ice ARK10281	0.0189511	0.0355798	561	0.610096	0.0120851	0.0978829
Proteobacteria	Deltaproteobacteria	Desulfuromonadales	Unclassified	sf_1	10076	AF407700.1	Great Artesian Basin clone G13	0.0190505	0.0356349	410.6	0.522149	0.0380084	0.135933
Acidobacteria	Acidobacteria	Acidobacteriales	Acidobacteriaceae	sf_14	176	AJ519387.1	uranium mining waste pile clone JG37-AG-112 sp.	0.0191313	0.0356349	554	0.554376	0.0258465	0.123786
Proteobacteria	Alphaproteobacteria	Caulobacterales	Caulobacteraceae	sf_1	6904	AB021414.1	Brevundimonas vesicularis str. IAM 12105T	0.0191493	0.0356349	586.4	0.376637	0.150454	0.231142
Proteobacteria	Gammaproteobacteria	Pasteurellales	Pasteurellaceae	sf_1	9349	AF227861.1	Pasteurella sp. str. 91985	0.0191603	0.0356349	490.6	0.429689	0.0966973	0.193753
Acidobacteria	Unclassified	Unclassified	Unclassified	sf_1	572	AF523986.1	forested wetland clone FW144	0.0192952	0.0357109	555.2	0.50164	0.0477301	0.149789
Chloroflexi	Dehalococcoidetes	Unclassified	Unclassified	sf_1	2438	AY093464.1	deep marine sediment clone MB-A2-110	0.0193499	0.0357109	598.2	0.674112	0.00418746	0.0719453
Caldithrix	Unclassified	Caldithrales	Caldithraceae	sf_2	91	AF323775.1	benzoate-degrading consortium clone BA059	0.01936	0.0357109	560.8	0.432472	0.0943205	0.193198
Proteobacteria	Betaproteobacteria	Burkholderiales	Burkholderiaceae	sf_1	7720	AY218566.1	penguin droppings sediments clone KD1-79	0.0193815	0.0357109	488.2	0.346397	0.188734	0.252608
Chlorobi	Unclassified	Unclassified	Unclassified	sf_8	344	AJ504563.1	sewage sludge clone	0.0196366	0.036097	437.6	0.497611	0.0498389	0.15244
Proteobacteria	Alphaproteobacteria	Caulobacterales	Caulobacteraceae	sf_1	6909	X87274.1	Brevundimonas diminuta str. DSM 1635	0.0197145	0.036135	603.8	0.373116	0.154616	0.232936
Proteobacteria	Gammaproteobacteria	Enterobacteriales	Enterobacteriaceae	sf_1	9385	AY264673.1	Australiococcus greville symbiont	0.0197801	0.036135	642.8	0.234689	0.381617	0.334151
Firmicutes	Catabacter	Unclassified	Unclassified	sf_4	4503	AB088976.1	termite gut homogenate clone Rs-H83 bacterium	0.0197941	0.036135	697.4	0.433769	0.0932271	0.193198
Proteobacteria	Unclassified	Unclassified	Unclassified	sf_20	2520			0.0199149	0.0361457	330.8	0.412056	0.112754	0.203601
Proteobacteria	Alphaproteobacteria	Rhodobacterales	Rhodobacteraceae	sf_1	7433	AF359537.1	Scrippsiella trochoidea NEPCC 15	0.0199354	0.0361457	345.2	0.34735	0.187439	0.251486
Firmicutes	Bacilli	Lactobacillales	Aerococcaceae	sf_1	3504	AB083413.1	Marinilactibacillus psychrotolerans str. O21	0.020001	0.0361457	809	0.48884	0.0546697	0.15553
Firmicutes	Unclassified	Unclassified	Unclassified	sf_8	2433	AF282252.1	Ferribacter thermoautotrophicus str. JW/JH-Fiji-2	0.0200615	0.0361457	378.8	0.385728	0.14006	0.223594
Firmicutes	Clostridia	Clostridiales	Clostridiaceae	sf_12	252	AB089014.1	termite gut homogenate clone Rs-A28 bacterium	0.0200906	0.0361457	778.2	0.488381	0.0549316	0.155549
Actinobacteria	Actinobacteria	Actinomycetales	Streptosporangiaceae	sf_1	1587	AB039960.1	Nonomuraea subsp. roseoviolacea str. SF 2303	0.02018	0.0361457	475.4	0.717955	0.0017358	0.0565381
Proteobacteria	Alphaproteobacteria	Rhizobiales	Rhizobiaceae	sf_1	7051	D12786.1	Mycoplana dimorpha str. IAM 13154	0.0201971	0.0361457	450.2	0.372758	0.155043	0.232936
SPAM	Unclassified	Unclassified	Unclassified	sf_1	705	AJ519639.1	uranium tailings soil clone Sh765B-AG-45	0.0202224	0.0361457	630.4	0.567777	0.0217777	0.121155
Proteobacteria	Alphaproteobacteria	Acetobacterales	Acetobacteraceae	sf_1	7529	AJ012698.1	Gluconacetobacter europaeus str. ZIM B028 V3	0.0202538	0.0361457	529.6	0.513902	0.0417191	0.141942
Actinobacteria	Actinobacteria	Actinomycetales	Corynebacteriaceae	sf_1	1803	AJ429234.1	Corynebacterium spheniscorum str. CCUG 45512	0.0202562	0.0361457	503.4	0.545851	0.0287228	0.128555
Proteobacteria	Gammaproteobacteria	Xanthomonadales	Xanthomonadaceae	sf_3	9277	AY188327.1	penguin droppings sediment clone KD8-68	0.020365	0.0362222	623.4	0.502568	0.0472534	0.148717
Proteobacteria	Alphaproteobacteria	Rhodobacterales	Rhodobacteraceae	sf_1	312	D88522.1	Pseudorhodobacter ferrugineus str. IAM12616	0.0203905	0.0362222	280.4	0.468514	0.0671843	0.16863
Actinobacteria	Actinobacteria	Actinomycetales	Cellulomonadaceae	sf_1	1780	AB023361.2	Cellulomonas sp. IFO16240 str. IFO 16240	0.020505	0.0363441	510.4	0.635875	0.00810574	0.0908873
Actinobacteria	BD2-10 group	Unclassified	Unclassified	sf_2	1562	AB015539.1	deep-sea sediment clone BD2-10	0.0208529	0.0368487	274.2	0.60461	0.0131018	0.102355
Proteobacteria	Epsilonproteobacteria	Campylobacterales	Helicobacteraceae	sf_3	10482	AJ441202.1	hydrothermal vent polychaete mucous clone P. palm C 140	0.0208827	0.0368487	643.4	0.574192	0.020014	0.114744
Proteobacteria	Betaproteobacteria	Nitrosomonadales	Nitrosomonadaceae	sf_1	7805	AY123800.1	Nitrosospira briensis str. Nsp10	0.0209677	0.0369165	789.6	0.353203	0.179614	0.246198
Cyanobacteria	Cyanobacteria	Plectonema	Unclassified	sf_1	5210	AY250881.1	lichen-dominated Antarctic cryptoendolithic community clone FBP403	0.0210841	0.0370072	305.2	0.274911	0.302788	0.305319
Cyanobacteria	Cyanobacteria	Chloroplasts	Chloroplasts	sf_5	4984	U70721.1	Cape Hatteras picoplankton clone OM164	0.0211127	0.0370072	466.2	0.584391	0.0174401	0.111264
Proteobacteria	Gammaproteobacteria	Chromatiales	Chromatiaceae	sf_1	8408	Y12368.2	Thiorhodovibrio winogradskyi	0.0213393	0.037322	538	0.37526	0.152071	0.232261
Proteobacteria	Gammaproteobacteria	Enterobacteriales	Enterobacteriaceae	sf_1	8282	AF476101.1	Antonina pretiosa symbiont	0.0214247	0.0373887	565.8	0.536955	0.0319783	0.131948
Proteobacteria	Epsilonproteobacteria	Campylobacterales	Campylobacteraceae	sf_3	10402	AB015256.1	deepest cold-seep area Japan Trench clone JTB129 proteobacterium	0.0215536	0.0374619	347.8	0.533648	0.0332571	0.134106
Proteobacteria	Gammaproteobacteria	Alteromonadales	Alteromonadaceae	sf_1	8904	AB059263.1	psychrophile deep-sea sediment south-western Pacific isolate str. PS12-4 PS12-4	0.0215612	0.0374619	287.6	0.330383	0.211374	0.260068
Bacteroidetes	Flavobacteria	Flavobacteriales	Flavobacteriaceae	sf_1	5589			0.0217422	0.0376938	426	0.338911	0.199112	0.257657
Bacteroidetes	Sphingobacteria	Sphingobacteriales	Sphingobacteriaceae	sf_1	5459	AJ551152.1	Pedobacter sp. An13	0.0218726	0.037837	349.2	0.519504	0.0391705	0.138293
Unclassified	Unclassified	Unclassified	Unclassified	sf_160	226			0.021952	0.0378917	1014	0.537464	0.0317848	0.131948
Proteobacteria	Gammaproteobacteria	Oceanospirillales	Saccharospirillaceae	sf_1	8889	AF452603.1	hypersaline Mono Lake clone ML110J-5	0.022139	0.0381313	648.8	0.257798	0.335058	0.31518
Proteobacteria	Gammaproteobacteria	Pseudomonadales	Pseudomonadaceae	sf_1	9366	AJ293826.1	Arctic seawater isolate str. R7366	0.0227433	0.0390873	418	0.408832	0.11588	0.206211
Bacteroidetes	Flavobacteria	Flavobacteriales	Flavobacteriaceae	sf_1	5479	AJ440988.1	Flavobacterium frigoris str. LMG 21471	0.0228104	0.039104	323.4	0.330946	0.21055	0.260068
Actinobacteria	Actinobacteria	Actinomycetales	Nocardiaceae	sf_1	1917	X80611.1	Nocardia otitidiscaviarum str. DSM43242	0.0228518	0.039104	247.6	0.603891	0.01324	0.102638
SPAM	Unclassified	Unclassified	Unclassified	sf_1	738	AJ532725.1	uranium mining waste clone JG34-KF-252	0.0232134	0.0395676	411.6	0.280351	0.29293	0.300438
Unclassified	Unclassified	Unclassified	Unclassified	sf_160	6430			0.0232226	0.0395676	433	0.488972	0.0545943	0.15553
Spirochaetes	Spirochaetes	Spirochaetales	Spirochaetaceae	sf_1	6532	AB084963.1	termite gut clone NkS39	0.0233049	0.0396226	313.6	0.437058	0.0904944	0.191068
Proteobacteria	Gammaproteobacteria	Unclassified	Unclassified	sf_3	9473	AF468261.1	Arctic pack ice; northern Fram Strait; 80 31.1 N; 01 deg 59.7 min E clone ARKDMS-58	0.0236611	0.0400322	419.4	0.369468	0.159008	0.235963
Acidobacteria	Acidobacteria	Acidobacteriales	Acidobacteriaceae	sf_14	274	AJ519379.1	uranium mining waste pile clone JG37-AG-73 sp.	0.0236966	0.0400322	659	0.3744	0.153088	0.232915
Bacteroidetes	Sphingobacteria	Sphingobacteriales	Flammeovirgaceae	sf_5	6084	AB078078.1	Microscilla arenaria str. IFO 15982	0.0236974	0.0400322	598	0.535256	0.0326305	0.133124
Proteobacteria	Alphaproteobacteria	Rhizobiales	Rhizobiaceae	sf_1	6798	AF508099.1	Agrobacterium tumefaciens TG14	0.023768	0.0400661	314.8	0.32138	0.224836	0.268033
Bacteroidetes	Sphingobacteria	Sphingobacteriales	Flexibacteraceae	sf_20	10311	AJ431236.1	Cytophaga sp. str. BHI60-57B	0.0238663	0.0401464	502.8	0.641542	0.00738983	0.0865969
Proteobacteria	Gammaproteobacteria	Alteromonadales	Alteromonadaceae	sf_1	9239	AF468400.1	Arctic sea ice ARK10228	0.0241341	0.0405108	731.6	0.362473	0.167665	0.241744
Firmicutes	Bacilli	Lactobacillales	Lactobacillaceae	sf_1	3526	AF401673.1	Lactobacillus sakei	0.0242797	0.0406692	714.4	0.531798	0.0339895	0.134106
Proteobacteria	Epsilonproteobacteria	Campylobacterales	Helicobacteraceae	sf_3	10444	AB006148.1	Helicobacter suncus str. Kaz-2	0.0244907	0.0409359	654.6	0.458587	0.0740037	0.175306
Unclassified	Unclassified	Unclassified	Unclassified	sf_160	6456			0.0246157	0.0410363	468.6	0.693603	0.00288304	0.0622697
Proteobacteria	Gammaproteobacteria	Enterobacteriales	Enterobacteriaceae	sf_1	8758	U80201.1	Pectobacterium cypripedii str. ATCC 29267	0.0246543	0.0410363	919.6	0.272824	0.306622	0.306105
Actinobacteria	Actinobacteria	Actinomycetales	Micrococcaceae	sf_1	1593	M23411.1	Arthrobacter globiformis	0.024837	0.0412537	520.8	0.673362	0.00424578	0.0719453
Proteobacteria	Betaproteobacteria	Burkholderiales	Alcaligenaceae	sf_1	7788	AY081994.1	atrazine-catabolizing microbial absence methanol clone KRA30-58	0.0249548	0.0412661	534.6	0.549598	0.0274299	0.128555
Proteobacteria	Gammaproteobacteria	Thiotrichales	Thiotrichaceae	sf_3	9015	AF110274.1	Beggiatoa alba str. B18LD; ATCC 33555	0.0249591	0.0412661	457	0.456959	0.0751682	0.17617
Proteobacteria	Gammaproteobacteria	Unclassified	Unclassified	sf_3	9044	AF420370.1	hydrothermal sediment clone AF420370	0.0250007	0.0412661	389.8	0.197959	0.462384	0.371862
Proteobacteria	Deltaproteobacteria	Desulfobacterales	Desulfobacteraceae	sf_5	9885	AJ012596.1	Sulfate reducing field soil and on rice roots Desulfobacteriaceae	0.0250958	0.0412893	407.2	0.614179	0.0113694	0.0964431
Actinobacteria	Actinobacteria	Actinomycetales	Mycobacteriaceae	sf_1	1726	X52925.1	Mycobacterium terrae str. ATCC 15755	0.025119	0.0412893	579.8	0.536616	0.0321077	0.131969
Proteobacteria	Gammaproteobacteria	Alteromonadales	Alteromonadaceae	sf_1	8863	AF529060.1	Alteromonas marina str. SW-47	0.025297	0.0414718	543	0.362041	0.16821	0.241744
Proteobacteria	Epsilonproteobacteria	Campylobacterales	Campylobacteraceae	sf_3	10447	Y13671.1	Sulfurospirillum deleyianum str. Spirillum 5175	0.0253347	0.0414718	594.6	0.445801	0.0835089	0.184151
Proteobacteria	Gammaproteobacteria	Enterobacteriales	Enterobacteriaceae	sf_1	8700	AF489427.1	Baumannia cicadellinicola	0.0255435	0.041645	350.6	0.265021	0.321207	0.308851
Firmicutes	Bacilli	Lactobacillales	Lactobacillaceae	sf_1	3604			0.0255456	0.041645	1005.6	0.448036	0.0817875	0.182741
Firmicutes	Clostridia	Clostridiales	Clostridiaceae	sf_12	4632			0.0256649	0.0417535	443.8	0.571654	0.0206983	0.116922
Bacteroidetes	Sphingobacteria	Sphingobacteriales	Flexibacteraceae	sf_19	5307	AB078082.1	Microscilla sericea str. IFO 16561	0.025726	0.0417671	491.4	0.359665	0.171227	0.24337
Cyanobacteria	Cyanobacteria	Oscillatoriales	Unclassified	sf_1	5189	AB039015.1	Oscillatoria sancta str. PCC 7515	0.0260337	0.041938	641.2	0.633171	0.00846603	0.0932557
Proteobacteria	Epsilonproteobacteria	Campylobacterales	Helicobacteraceae	sf_3	10442	AF292378.1	Helicobacter cetorum str. MIT 99-5656	0.0260396	0.041938	670.8	0.497386	0.0499588	0.15244
Proteobacteria	Alphaproteobacteria	Rhodobacterales	Unclassified	sf_5	7025	AF382105.1	bacterioplankton clone ZA2526c	0.0260694	0.041938	363.8	0.289127	0.277433	0.294128
Acidobacteria	Acidobacteria	Acidobacteriales	Acidobacteriaceae	sf_6	6345	AJ534634.1	soil sample uranium mining waste pile near town Johanngeorgenstadt clone JG36-TzT-77 bacterium	0.0261024	0.041938	664.2	0.531771	0.0340001	0.134106
Actinobacteria	Actinobacteria	Coriobacteriales	Coriobacteriaceae	sf_1	2021	AB089070.1	termite gut homogenate clone Rs-D41 bacterium	0.0261284	0.041938	362.2	0.645243	0.00695008	0.0865969
Proteobacteria	Alphaproteobacteria	Consistiales	SAR11	sf_2	7043	AF353223.1	marine clone Arctic95D-8	0.0261488	0.041938	313.6	0.397734	0.1271	0.216111
Gemmatimonadetes	Unclassified	Unclassified	Unclassified	sf_5	9464	AF432648.1	lodgepole pine rhizosphere soil British Columbia Ministry Forests Long-Term Soil Productivity	0.0263696	0.0422066	491.8	0.515465	0.0409959	0.141942
Actinobacteria	Actinobacteria	Actinomycetales	Micrococcaceae	sf_1	1573	AJ315492.1	Arthrobacter nicotianae str. SB42	0.0264856	0.0423068	397.8	0.659333	0.00546247	0.0783588
Cyanobacteria	Cyanobacteria	Plectonema	Unclassified	sf_1	5010	AF170757.1	LPP-group cyanobacterium isolate str. QSSC5cya QSSC5cya	0.0265721	0.0423595	372.6	0.295262	0.2669	0.289368
Proteobacteria	Betaproteobacteria	Burkholderiales	Comamonadaceae	sf_1	8105	AF078768.1	Hydrogenophaga taeniospiralis str. ATCC 49743	0.02669	0.0424599	476.4	0.478673	0.060693	0.163037
Firmicutes	Bacilli	Lactobacillales	Lactobacillaceae	sf_1	3330	AB107637.1	Lactobacillus kitasatonis str. KM9212	0.0267832	0.0424599	624.2	0.432575	0.094233	0.193198
Actinobacteria	Actinobacteria	Actinomycetales	Frankiaceae	sf_1	1644	AJ408870.1	Frankia sp. M16467	0.0267958	0.0424599	554.2	0.682511	0.00357717	0.0665068
Proteobacteria	Epsilonproteobacteria	Campylobacterales	Campylobacteraceae	sf_3	10540	AF550655.1	Campylobacter showae str. LMG 12636	0.0269743	0.0426575	476.8	0.522282	0.0379507	0.135933
Proteobacteria	Gammaproteobacteria	Pasteurellales	Pasteurellaceae	sf_1	8876	AF053894.1	Mannheimia sp. R19.2 str. R19.2; CCUG 38463 R19.2	0.0270871	0.0427451	463.6	0.39947	0.125298	0.215655
Firmicutes	Clostridia	Clostridiales	Clostridiaceae	sf_12	4299	AB100466.1	termite gut clone Rs-L02	0.0271376	0.0427451	718	0.452416	0.0784881	0.180872
Actinobacteria	Actinobacteria	Actinomycetales	Microbacteriaceae	sf_1	1186	AF505514.1	Cryocola antiquus str. VKM 103PF	0.0271993	0.0427572	416.4	0.641846	0.00735286	0.0865969
Proteobacteria	Gammaproteobacteria	aquatic clone group	Unclassified	sf_1	9246	AY221036.1	Mammoth Cave sediment clone CCD24	0.0273304	0.0427795	396.2	0.333044	0.207498	0.259732
Proteobacteria	Gammaproteobacteria	Enterobacteriales	Enterobacteriaceae	sf_1	9594	AB089244.1	Morganella morganii str. ATCC35200	0.0273714	0.0427795	681.6	0.252662	0.345114	0.319828
Chloroflexi	Chloroflexi-4	Unclassified	Unclassified	sf_2	2344	AF507700.1	forest soil clone C083	0.0274281	0.0427795	477.8	0.608279	0.0124148	0.0990959
Cyanobacteria	Cyanobacteria	Chloroplasts	Chloroplasts	sf_5	5183	M37430.1	Pisum sativum -- chloroplast	0.0274295	0.0427795	365.8	0.440336	0.0878283	0.189326
Acidobacteria	Acidobacteria	Acidobacteriales	Acidobacteriaceae	sf_14	396	Y07586.1	soil clone DA023	0.0275527	0.0428873	416.8	0.465307	0.0693348	0.172014
Cyanobacteria	Cyanobacteria	Plectonema	Unclassified	sf_1	5190	AF091110.1	Plectonema sp. str. F3	0.0276558	0.04292	454.6	0.222439	0.407654	0.346563
Acidobacteria	Acidobacteria	Acidobacteriales	Acidobacteriaceae	sf_14	6425	AF407719.1	Great Artesian Basin clone B27	0.027682	0.04292	526.2	0.645239	0.0069506	0.0865969
Proteobacteria	Gammaproteobacteria	Legionellales	Legionellaceae	sf_1	8193	Z49731.1	Legionella parisiensis	0.0277459	0.042935	453.8	0.439963	0.0881282	0.189601
Acidobacteria	Acidobacteria-6	Unclassified	Unclassified	sf_1	642	Z95710.1	Holophaga/Acidobacterium phylum clone 32-10	0.0279207	0.0431213	401.4	0.43833	0.0894526	0.190959
Proteobacteria	Alphaproteobacteria	Rhizobiales	Rhizobiaceae	sf_1	6683	D14516.1	Sinorhizobium fredii str. ATCC35423	0.0279825	0.0431325	303.6	0.279203	0.294994	0.301358
Actinobacteria	Actinobacteria	Actinomycetales	Microbacteriaceae	sf_1	1779	AB042083.1	Microbacterium sp. str. VKM Ac-2048	0.0280684	0.0431496	424.8	0.620567	0.0103169	0.0964431
Actinobacteria	Actinobacteria	Actinomycetales	Nocardiaceae	sf_1	1834	AF430047.1	Nocardia transvalensis str. DSM 43405	0.0281338	0.0431496	328	0.622759	0.00997398	0.0964431
Actinobacteria	Actinobacteria	Actinomycetales	Microbacteriaceae	sf_1	1404	AJ507468.1	freshwater isolate str. MWH-Ta3	0.0281569	0.0431496	306.4	0.590963	0.0159231	0.108942
Actinobacteria	Actinobacteria	Actinomycetales	Sporichthyaceae	sf_1	1695	AY250883.1	lichen-dominated Antarctic cryptoendolithic community clone FBP417	0.028234	0.0431842	519.4	0.630344	0.00885632	0.0957316
Chloroflexi	Dehalococcoidetes	Unclassified	Unclassified	sf_1	2445	AY093458.1	deep marine sediment clone MB-A2-103	0.0283605	0.0432941	485.2	0.563295	0.0230792	0.122181
Unclassified	Unclassified	Unclassified	Unclassified	sf_160	6337			0.0285966	0.0435705	603	0.334712	0.205091	0.259732
Proteobacteria	Gammaproteobacteria	Chromatiales	Unclassified	sf_1	9282			0.0288426	0.0436362	601.6	0.498766	0.0492274	0.151892
Acidobacteria	Acidobacteria	Acidobacteriales	Acidobacteriaceae	sf_6	6362	Y07646.1	grassland soil clone DA052	0.0288649	0.0436362	776	0.500086	0.0485352	0.151025
Actinobacteria	Actinobacteria	Actinomycetales	Cellulomonadaceae	sf_1	1450			0.0288927	0.0436362	426	0.643013	0.00721248	0.0865969
Actinobacteria	Actinobacteria	Actinomycetales	Mycobacteriaceae	sf_1	1650	X58890.1	Mycobacterium tuberculosis str. NCTC 7416 H37Rv	0.0289211	0.0436362	500.2	0.540099	0.0307972	0.130904
Proteobacteria	Alphaproteobacteria	Rhizobiales	Phyllobacteriaceae	sf_1	6916	AJ441009.1	lake microbial mat isolate str. R-9219	0.0289946	0.0436362	382.8	0.325585	0.218483	0.265032
Proteobacteria	Deltaproteobacteria	Desulfovibrionales	Desulfovibrionaceae	sf_1	10189			0.0290554	0.0436362	322.6	0.456481	0.0755124	0.176601
Spirochaetes	Spirochaetes	Spirochaetales	Spirochaetaceae	sf_1	6508	X89050.1	termite hindgut clone mpsp2	0.0291161	0.0436362	289.2	0.502869	0.0471	0.148717
Spirochaetes	Spirochaetes	Spirochaetales	Spirochaetaceae	sf_1	6476	AB084965.1	termite gut clone NkS50	0.0291604	0.0436362	296.4	0.515354	0.0410466	0.141942
Acidobacteria	Solibacteres	Unclassified	Unclassified	sf_1	6426	AF407714.1	Great Artesian Basin clone B11	0.0291903	0.0436362	794.6	0.325703	0.218307	0.265032
Thermotogae	Thermotogae	Thermotogales	Thermotogaceae	sf_4	51	AJ419874.1	Thermosipho sp. str. MV1063	0.0292316	0.0436362	488	0.338672	0.199448	0.257657
Firmicutes	Clostridia	Clostridiales	Lachnospiraceae	sf_5	4164	AF376226.1	ckncm322-B3-7 clone	0.0292455	0.0436362	671.8	0.524982	0.0367932	0.135913
Proteobacteria	Betaproteobacteria	Burkholderiales	Alcaligenaceae	sf_1	7902	AF155147.1	Alcaligenes faecalis str. M3A	0.0293336	0.0436853	579.2	0.230182	0.39109	0.340013
Proteobacteria	Alphaproteobacteria	Caulobacterales	Caulobacteraceae	sf_1	7359	AJ227782.1	Brevundimonas bacteroides str. CB7	0.0297743	0.0441756	548.4	0.362697	0.167383	0.241744
Proteobacteria	Alphaproteobacteria	Caulobacterales	Caulobacteraceae	sf_1	7366	AJ227784.1	Brevundimonas subvibrioides str. CB81	0.0297743	0.0441756	548.4	0.362697	0.167383	0.241744
Actinobacteria	Actinobacteria	Actinomycetales	Micrococcaceae	sf_1	1494	X80748.1	Arthrobacter agilis str. DSM 20550	0.0298859	0.0442583	522.6	0.666643	0.00479795	0.0755011
Proteobacteria	Gammaproteobacteria	Oceanospirillales	Halomonadaceae	sf_1	8576	AF550586.1	Halomonas sp. Ko502	0.0301561	0.0445751	367.6	0.269436	0.312906	0.30665
Cyanobacteria	Cyanobacteria	Thermosynechococcus	Unclassified	sf_1	5012	AF448081.1	Synechococcus sp. str. PCC 6312	0.0302526	0.0446346	494.2	0.308997	0.24422	0.278195
Proteobacteria	Betaproteobacteria	Nitrosomonadales	Nitrosomonadaceae	sf_1	7931	L35509.1	Nitrosospira multiformis	0.0303855	0.0447473	353.4	0.506787	0.0451329	0.14624
Spirochaetes	Spirochaetes	Spirochaetales	Spirochaetaceae	sf_1	6473	AB088891.1	termite gut homogenate clone Rs-B29 sp.	0.0305074	0.0448433	255.8	0.226468	0.398989	0.34309
Proteobacteria	Alphaproteobacteria	Rhodobacterales	Rhodobacteraceae	sf_1	6827	AF468352.1	Arctic sea ice ARK10013	0.0305741	0.0448583	491.4	0.556426	0.025189	0.122231
Firmicutes	Bacilli	Lactobacillales	Lactobacillaceae	sf_1	3342	Y17362.1	Lactobacillus crispatus str. DSM 20584 T	0.030715	0.0449817	669.8	0.461507	0.0719476	0.173528
Actinobacteria	Actinobacteria	Actinomycetales	Kineosporiaceae	sf_1	1087	AB003931.1	Kineosporia aurantiaca str. JCM3230	0.0308887	0.0451526	551.4	0.637237	0.00792884	0.0900396
Proteobacteria	Deltaproteobacteria	Desulfobacterales	Desulfobacteraceae	sf_5	9777	AY197376.1	Guaymas Basin hydrothermal vent sediments clone B01R004	0.0310479	0.045236	372.8	0.546027	0.0286609	0.128555
Unclassified	Unclassified	Unclassified	Unclassified	sf_132	9820			0.0310809	0.045236	265.8	0.409352	0.115371	0.205639
Spirochaetes	Spirochaetes	Spirochaetales	Spirochaetaceae	sf_1	6529	AB062806.1	termite gut homogenate clone BCf10-21	0.0311534	0.045236	288.4	0.458908	0.0737752	0.175242
Verrucomicrobia	Verrucomicrobiae	Verrucomicrobiales	Verrucomicrobiaceae	sf_6	871			0.0311742	0.045236	332.6	0.433835	0.0931713	0.193198
Proteobacteria	Gammaproteobacteria	Alteromonadales	Alteromonadaceae	sf_1	9236	AF114501.1	attached marine recovered surface clone 18 proteobacterium	0.0312963	0.0452525	402.6	0.371404	0.156666	0.234241
Firmicutes	Bacilli	Bacillales	Paenibacillaceae	sf_1	3917	AB039334.1	Brevibacillus agri str. M1-5	0.0313427	0.0452525	390.2	0.226254	0.399445	0.343194
Acidobacteria	Acidobacteria-6	Unclassified	Unclassified	sf_1	1049	AF013534.2	soil clone C112	0.0313569	0.0452525	428.6	0.526357	0.0362143	0.135574
Proteobacteria	Gammaproteobacteria	Pseudomonadales	Pseudomonadaceae	sf_1	9219	AF181576.1	Pseudomonas cf. monteilii 9	0.0315901	0.0454368	671.6	0.581564	0.0181263	0.111264
Proteobacteria	Gammaproteobacteria	Thiotrichales	Thiotrichaceae	sf_3	9321	AB108786.1	marine sediment clone Tokyo Bay D	0.0316416	0.0454368	565.4	0.365185	0.164272	0.240306
Verrucomicrobia	Verrucomicrobiae	Verrucomicrobiales	Verrucomicrobia subdivision 5	sf_1	533	AY114330.1	anoxic marine sediment clone LD1-PB12	0.0316622	0.0454368	690.6	0.666938	0.00477258	0.0755011
Spirochaetes	Spirochaetes	Spirochaetales	Spirochaetaceae	sf_1	6494	AB088890.1	termite gut homogenate clone Rs-C47 sp.	0.0317979	0.0454368	312	0.427058	0.0989837	0.194879
Proteobacteria	Gammaproteobacteria	Unclassified	Unclassified	sf_3	8959	AF406527.1	bacterioplankton clone AEGEAN_133	0.0318041	0.0454368	391.8	0.218593	0.416017	0.349546
Actinobacteria	Actinobacteria	Actinomycetales	Micromonosporaceae	sf_1	1542	AJ277575.1	Actinoplanes garbadinensis str. IMSNU 20040	0.0318286	0.0454368	455.2	0.597288	0.014562	0.106936
Proteobacteria	Gammaproteobacteria	Methylococcales	Methylococcaceae	sf_1	9438	AJ535221.1	marine sediment above hydrate ridge clone Hyd24-01 proteobacterium	0.0319384	0.0455114	344.6	0.43078	0.0957606	0.193547
Unclassified	Unclassified	Unclassified	Unclassified	sf_160	485	AY193179.1	thermal spring mat clone O1aA90	0.0320603	0.0456031	506.2	0.435749	0.091575	0.191409
Proteobacteria	Alphaproteobacteria	Rickettsiales	Anaplasmataceae	sf_3	6648	AF035160.1	Wolbachia sp	0.0321987	0.0456105	373.6	0.660276	0.00537286	0.0783588
Actinobacteria	Actinobacteria	Actinomycetales	Cellulomonadaceae	sf_1	1748	Y18378.1	Beutenbergia cavernosa str. DSM 12333	0.0322267	0.0456105	494.4	0.661637	0.00524561	0.0783588
Actinobacteria	Actinobacteria	Acidimicrobiales	Unclassified	sf_1	1666			0.0322382	0.0456105	449.2	0.603017	0.0134093	0.102638
SR1	Unclassified	Unclassified	Unclassified	sf_1	2900			0.0327828	0.0462984	529.6	0.310581	0.241684	0.277228
Acidobacteria	Acidobacteria-6	Unclassified	Unclassified	sf_1	897	AY221071.1	Mammoth cave clone CCM8b	0.0329656	0.0464211	547.4	0.521205	0.03842	0.13696
Proteobacteria	Gammaproteobacteria	Pasteurellales	Pasteurellaceae	sf_1	8555	AY613451.1	Haemophilus influenzae str. M9741	0.0329869	0.0464211	764.2	0.438368	0.0894215	0.190959
Proteobacteria	Gammaproteobacteria	Unclassified	Unclassified	sf_3	9582			0.0331801	0.0466101	381.4	0.209393	0.436381	0.357387
Proteobacteria	Alphaproteobacteria	Caulobacterales	Caulobacteraceae	sf_1	7436	AJ227797.1	Brevundimonas sp. str. FWC40	0.0334499	0.0469061	568.2	0.346548	0.188529	0.252608
Firmicutes	Clostridia	Clostridiales	Clostridiaceae	sf_12	2764			0.0335754	0.046929	612.6	0.377827	0.149064	0.230616
Proteobacteria	Alphaproteobacteria	Unclassified	Unclassified	sf_6	7647			0.0335847	0.046929	773.2	0.51246	0.0423948	0.141942
Proteobacteria	Deltaproteobacteria	Myxococcales	Polyangiaceae	sf_3	9900	AF280857.1	bioreactor clone mle1-27	0.0339696	0.0473832	429.2	0.486149	0.0562186	0.155986
Proteobacteria	Alphaproteobacteria	Rhizobiales	Rhizobiaceae	sf_1	7457			0.0340412	0.0473997	365.8	0.461585	0.0718937	0.173528
Proteobacteria	Gammaproteobacteria	Pseudomonadales	Pseudomonadaceae	sf_1	9028	AF468452.1	Pseudomonas koreensis str. Ps 9-14	0.0341165	0.0474211	351.4	0.440878	0.0873929	0.188756
Actinobacteria	Actinobacteria	Actinomycetales	Pseudonocardiaceae	sf_1	1402			0.034236	0.0474729	461.4	0.62374	0.00982343	0.0964431
Proteobacteria	Gammaproteobacteria	Pseudomonadales	Pseudomonadaceae	sf_1	9221	AJ492830.1	Pseudomonas fulgida str. DSM 14938 = LMG 2146 P 515/12	0.0343144	0.0474729	375.4	0.453605	0.077609	0.179976
Proteobacteria	Gammaproteobacteria	Aeromonadales	Aeromonadaceae	sf_1	9494	AY532691.1	Aeromonas molluscorum str. 849T	0.0343335	0.0474729	567.6	0.221253	0.410222	0.347593
Proteobacteria	Deltaproteobacteria	Desulfobacterales	Desulfobacteraceae	sf_5	10268			0.0344527	0.0475276	441.2	0.445529	0.0837202	0.184151
Proteobacteria	Gammaproteobacteria	Pseudomonadales	Pseudomonadaceae	sf_1	8691	AE004501.1	Pseudomonas aeruginosa str. PAO1	0.0345266	0.0475276	263.2	0.334759	0.205023	0.259732
Firmicutes	Bacilli	Lactobacillales	Lactobacillaceae	sf_1	3478	AF257096.1	Lactobacillus crispatus str. ATCC33197	0.034553	0.0475276	686.6	0.468482	0.0672055	0.16863
Proteobacteria	Alphaproteobacteria	Rhizobiales	Rhizobiaceae	sf_1	6964	AE008265.2	Agrobacterium tumefaciens str. C58 Cereon	0.0346577	0.047589	308.6	0.313346	0.237297	0.274532
Proteobacteria	Betaproteobacteria	Nitrosomonadales	Nitrosomonadaceae	sf_1	7789			0.0347424	0.0476227	578.8	0.420679	0.104685	0.198705
Actinobacteria	Actinobacteria	Actinomycetales	Streptosporangiaceae	sf_1	1505	U48986.1	Microbispora rosea subsp. aerata str. ATCC 27098	0.0349716	0.0478541	249	0.487948	0.0551794	0.155554
Proteobacteria	Gammaproteobacteria	Acidithiobacillales	Acidithiobacillaceae	sf_1	8913	AJ535246.1	marine sediment above hydrate ridge clone Hyd89-87 proteobacterium	0.0350446	0.0478713	557.4	0.560775	0.0238368	0.122181
Proteobacteria	Betaproteobacteria	Burkholderiales	Comamonadaceae	sf_1	7807	Y18618.1	Aquaspirillum metamorphum str. DSM 1837	0.0351903	0.0479876	460.4	0.495874	0.0507693	0.152887
Spirochaetes	Spirochaetes	Spirochaetales	Spirochaetaceae	sf_1	6554	AB088889.1	termite gut homogenate clone Rs-A43 sp.	0.0353553	0.0481298	281.6	0.476591	0.061984	0.163784
Actinobacteria	Actinobacteria	Actinomycetales	Mycobacteriaceae	sf_1	1262	AJ310467.1	Mycobacterium holsaticum str. 1406	0.0354663	0.0481981	519	0.52584	0.036431	0.135574
Gemmatimonadetes	Unclassified	Unclassified	Unclassified	sf_5	1149	AF432618.1	lodgepole pine rhizosphere soil clone C17.11WL	0.0361866	0.048974	309.2	0.425876	0.100023	0.195154
Proteobacteria	Alphaproteobacteria	Unclassified	Unclassified	sf_6	6920	AY486423.1	Pseudovibrio denitrificans str. DN34	0.0361915	0.048974	512.4	0.583131	0.0177435	0.111264
Proteobacteria	Betaproteobacteria	Burkholderiales	Burkholderiaceae	sf_1	7957	AF476089.1	Maconellicoccus hirsutus symbiont	0.0362227	0.048974	459.4	0.494466	0.051533	0.153008
Actinobacteria	Actinobacteria	Actinomycetales	Streptomycetaceae	sf_1	1375	AF423240.1	soil clone 228-1	0.0363569	0.0490717	452.8	0.617984	0.0107328	0.0964431
Proteobacteria	Gammaproteobacteria	Ellin307/WD2124	Unclassified	sf_1	9458	AJ518786.1	uranium mining waste pile clone JG37-AG-94 proteobacterium	0.036421	0.0490746	321.8	0.47028	0.0660207	0.166946
Proteobacteria	Epsilonproteobacteria	Campylobacterales	Unclassified	sf_1	10622			0.0366439	0.0492761	312.6	0.421246	0.104168	0.19852
Proteobacteria	Gammaproteobacteria	Thiotrichales	Piscirickettsiaceae	sf_3	9557	AF449225.1	Riftia pachyptila's tube clone R76-B23	0.0366949	0.0492761	573.4	0.25284	0.344763	0.319828
Actinobacteria	Actinobacteria	Actinomycetales	Microbacteriaceae	sf_1	1241	AJ717353.1	Microbacterium kitamiense CV88	0.0369386	0.0495152	398.6	0.620003	0.0104067	0.0964431
Proteobacteria	Gammaproteobacteria	Aeromonadales	Aeromonadaceae	sf_1	8340	X71120.1	Aeromonas ichthiosmia	0.036998	0.0495152	486.4	0.260352	0.330123	0.312137
Proteobacteria	Gammaproteobacteria	Alteromonadales	Alteromonadaceae	sf_1	8732	AY205304.1	new genus YSK-2002	0.037201	0.0496996	371.8	0.250011	0.350369	0.322155
Proteobacteria	Epsilonproteobacteria	Campylobacterales	Campylobacteraceae	sf_3	10456	L06975.1	Campylobacter showae	0.0372612	0.0496996	505	0.416154	0.108867	0.200871
Proteobacteria	Deltaproteobacteria	Desulfovibrionales	Desulfovibrionaceae	sf_1	10071	M34113.1	Desulfovibrio desulfuricans	0.0373745	0.0497352	674.8	0.562898	0.0231974	0.122181
Acidobacteria	Acidobacteria-4	Ellin6075/11-25	Unclassified	sf_1	87	AF097766.1	activated sludge clone 2951	0.0374802	0.0497352	489.4	0.526113	0.0363164	0.135574
Proteobacteria	Alphaproteobacteria	Rhizobiales	Unclassified	sf_1	6899			0.037555	0.0497352	392	0.514335	0.0415176	0.141942
Proteobacteria	Alphaproteobacteria	Unclassified	Unclassified	sf_6	6946	AY221043.1	Mammoth cave clone CCM12a	0.0375943	0.0497352	384	0.391818	0.133378	0.217644
Actinobacteria	BD2-10 group	Unclassified	Unclassified	sf_2	1652	AY193208.1	marine sediment clone Bol7	0.0376018	0.0497352	571.4	0.656641	0.00572501	0.0797539
Chloroflexi	Anaerolineae	Unclassified	Unclassified	sf_9	576	AJ306746.2	DCP-dechlorinating consortium clone SHA-36	0.0377168	0.0497469	565.4	0.268515	0.314627	0.306931
Planctomycetes	Planctomycetacia	Planctomycetales	Anammoxales	sf_4	4694	AF418968.1	USA: Colorado Fort collins Horsetooth Reservoir clone HT2F11	0.0377362	0.0497469	419	0.561108	0.0237357	0.122181
Proteobacteria	Deltaproteobacteria	Desulfovibrionales	Desulfovibrionaceae	sf_1	10016	AB089110.1	termite gut homogenate clone Rs-N35 proteobacterium	0.0378058	0.0497558	857.6	0.347446	0.187309	0.251486
Proteobacteria	Gammaproteobacteria	Aeromonadales	Aeromonadaceae	sf_1	8364	S39232.1	Aeromonas allosaccharophila str. CECT 4199	0.0380501	0.0499944	499.6	0.26394	0.323259	0.309513
Proteobacteria	Gammaproteobacteria	Pseudomonadales	Pseudomonadaceae	sf_1	9175	AF405328.1	Pseudomonas extremorientalis str. KMM3447	0.0382177	0.0501313	388.2	0.532796	0.0335929	0.134106
Acidobacteria	Acidobacteria-5	Unclassified	Unclassified	sf_1	523	AF245036.1	soil metagenomic library clone 17F9	0.0383803	0.0502615	617	0.582237	0.017961	0.111264
Chloroflexi	Anaerolineae	Unclassified	Unclassified	sf_9	72	AY221035.1	sediments collected at Charon's Cascade near Echo River October 2000 clone CCD21	0.0386441	0.0505234	745.2	0.52286	0.0377009	0.135933
Proteobacteria	Alphaproteobacteria	Consistiales	Unclassified	sf_5	6735	AF510192.1	Candidatus Pelagibacter ubique str. HTCC1002	0.0387763	0.0505411	243.8	0.257528	0.335584	0.315405
Proteobacteria	Gammaproteobacteria	Pseudomonadales	Pseudomonadaceae	sf_1	8338	AF267911.1	Pseudomonas synxantha str. DSM 13080 G	0.0389213	0.0505411	350.2	0.443821	0.085056	0.185663
Proteobacteria	Gammaproteobacteria	Cardiobacteriales	Cardiobacteriaceae	sf_1	8536	M35014.1	Cardiobacterium hominis	0.0390376	0.0505411	1187.6	0.463707	0.0704269	0.173163
Proteobacteria	Gammaproteobacteria	Thiotrichales	Unclassified	sf_1	8323	AF420363.1	hydrothermal sediment clone AF420363	0.0390454	0.0505411	549.4	0.241224	0.36811	0.32946
Acidobacteria	Acidobacteria	Holophagales	Unclassified	sf_1	734	AF529125.1	trichloroethene-contaminated site clone FTLM5 bacterium	0.0390811	0.0505411	304.6	0.353369	0.179395	0.246198
Bacteroidetes	Bacteroidetes	Bacteroidales	Rikenellaceae	sf_5	5892	AJ229217.1	anoxic bulk soil flooded rice microcosm clone BSV73	0.039136	0.0505411	304.4	0.427744	0.0983835	0.194879
Cyanobacteria	Cyanobacteria	Chloroplasts	Chloroplasts	sf_5	5182	M81884.1	Epifagus virginiana -- chloroplast	0.0392209	0.0505411	467.2	0.493091	0.0522869	0.153588
Proteobacteria	Gammaproteobacteria	Pasteurellales	Pasteurellaceae	sf_1	8409	AF499896.1	human colonic mucosal biopsy clone ABLCf1	0.0392294	0.0505411	697.4	0.396033	0.128884	0.216396
Proteobacteria	Gammaproteobacteria	Alteromonadales	Alteromonadaceae	sf_1	8600	AB094412.1	Colwellia piezophila str. Y223G	0.0392318	0.0505411	417	0.297473	0.263166	0.28769
Actinobacteria	Actinobacteria	Actinomycetales	Microbacteriaceae	sf_1	1437	AJ575522.1	freshwater clone SV1-16	0.0396418	0.0509864	490	0.544083	0.0293489	0.128555
Proteobacteria	Unclassified	Unclassified	Unclassified	sf_17	7819			0.0399124	0.0512513	459.2	0.513465	0.0419229	0.141942
Gemmatimonadetes	Unclassified	Unclassified	Unclassified	sf_5	442	AF507712.1	forest soil clone S0134	0.0401955	0.0515313	418.2	0.314501	0.23548	0.273417
Firmicutes	Bacilli	Bacillales	Paenibacillaceae	sf_1	3641	AJ313027.1	Brevibacillus sp. MN 47.2a	0.0402737	0.0515481	486.2	0.49267	0.0525197	0.153686
Cyanobacteria	Unclassified	Unclassified	Unclassified	sf_5	5131	AB045961.1	Oscillatoria princeps str. NIVA CYA 150	0.0403529	0.0515662	237.4	0.355927	0.176045	0.245157
Proteobacteria	Gammaproteobacteria	Legionellales	Unclassified	sf_3	8587	AF526927.2	Mars Odyssey Orbiter and encapsulation facility clone T5-3	0.0406738	0.0518606	380.2	0.476713	0.0619078	0.163784
Natronoanaerobium	Unclassified	Unclassified	Unclassified	sf_1	2437	AF507879.2	Mono Lake at depth 23m station 6 July 2000 clone ML623J-19	0.0407594	0.0518606	508.6	0.638318	0.00779065	0.0893919
Actinobacteria	Actinobacteria	Actinomycetales	Microbacteriaceae	sf_1	1513	AF263565.1	Microbacterium gubbeenense str. DPC 5284	0.0407797	0.0518606	231.8	0.574174	0.0200191	0.114744
Proteobacteria	Alphaproteobacteria	Rhodobacterales	Rhodobacteraceae	sf_1	6652	AF353235.1	marine clone Arctic96A-1	0.0411606	0.0522612	291.8	0.345001	0.190642	0.253213
Proteobacteria	Deltaproteobacteria	Myxococcales	Unclassified	sf_1	10259			0.0413208	0.0523078	268.4	0.392328	0.132828	0.217083
Proteobacteria	Gammaproteobacteria	Unclassified	Unclassified	sf_3	8606			0.0413328	0.0523078	511.2	0.252606	0.345225	0.319828
Proteobacteria	Betaproteobacteria	Burkholderiales	Comamonadaceae	sf_1	8112	AF336312.1	Comamonas testosteroni str. SMCC B329	0.0414569	0.0523078	507.6	0.253124	0.344202	0.319686
Acidobacteria	Acidobacteria-4	Ellin6075/11-25	Unclassified	sf_1	435	AY211077.1	anaerobic VC-degrading enrichment clone VC47 bacterium	0.0414614	0.0523078	433.2	0.556503	0.0251647	0.122231
Proteobacteria	Gammaproteobacteria	Symbionts	Unclassified	sf_1	9556	AY129087.1	Seepiophila jonesi symbiont	0.0415821	0.0523767	591.6	0.319393	0.227879	0.26949
Actinobacteria	Actinobacteria	Actinomycetales	Thermomonosporaceae	sf_1	1546	AJ420137.1	Actinomadura fulvescens str. DSM 43923T	0.0420363	0.0527663	503.6	0.622185	0.0100629	0.0964431
Actinobacteria	Actinobacteria	Actinomycetales	Micrococcaceae	sf_1	1213	X87756.1	Kocuria roseus	0.0420503	0.0527663	494.2	0.640233	0.00755054	0.0875488
Proteobacteria	Betaproteobacteria	Burkholderiales	Burkholderiaceae	sf_1	7959	AF476088.1	Maconellicoccus australiensis symbiont	0.0421498	0.0527663	405	0.451061	0.0794982	0.181211
Proteobacteria	Gammaproteobacteria	Chromatiales	Chromatiaceae	sf_1	9052			0.0421579	0.0527663	238.4	0.206274	0.4434	0.361791
Actinobacteria	Actinobacteria	Actinomycetales	Streptomycetaceae	sf_3	1743	AB026214.1	Streptomyces scabiei str. DNK-G01	0.0422661	0.0527994	217.4	0.548854	0.0276832	0.128555
Bacteroidetes	Flavobacteria	Flavobacteriales	Flavobacteriaceae	sf_1	5901	AF468423.1	Arctic sea ice ARK10159	0.0423175	0.0527994	341.4	0.310361	0.242035	0.277228
Proteobacteria	Deltaproteobacteria	Desulfovibrionales	Desulfovibrionaceae	sf_1	10244			0.0425661	0.0530259	305.6	0.48328	0.0579061	0.159293
Spirochaetes	Spirochaetes	Spirochaetales	Spirochaetaceae	sf_1	6560			0.042864	0.0531479	280	0.635397	0.00816851	0.0908873
Firmicutes	Bacilli	Lactobacillales	Aerococcaceae	sf_1	3615	AJ278341.2	Aerococcus urinaehominis str. CCUG 42038b	0.0429107	0.0531479	408	0.310156	0.242363	0.277228
Firmicutes	Bacilli	Lactobacillales	Leuconostocaceae	sf_1	3573	AF360736.1	Leuconostoc ficulneum str. FS-1	0.0429109	0.0531479	397.6	0.57465	0.0198927	0.114744
Spirochaetes	Spirochaetes	Spirochaetales	Spirochaetaceae	sf_1	6502	AF139203.1	Treponema denticola str. ATCC35405	0.0429323	0.0531479	345.4	0.512785	0.0422418	0.141942
Proteobacteria	Alphaproteobacteria	Rhizobiales	Rhizobiaceae	sf_1	7070			0.043507	0.0537754	297.8	0.338512	0.199675	0.257657
Euryarchaeota	Thermoplasmata	Unclassified	Unclassified	sf_1	2303			0.0437001	0.0539299	214.8	0.474945	0.0630191	0.165114
Proteobacteria	Betaproteobacteria	Unclassified	Unclassified	sf_3	7765			0.0438324	0.0539498	275.2	0.496413	0.0504794	0.152887
Chloroflexi	Anaerolineae	Unclassified	Unclassified	sf_1	266			0.0438524	0.0539498	642.4	0.577259	0.0192112	0.112562
Synergistes	Unclassified	Unclassified	Unclassified	sf_3	60	AF481216.1	Flexistipes sp. str. E3_33	0.0439296	0.053961	718.4	0.525172	0.0367128	0.135913
Proteobacteria	Betaproteobacteria	Hydrogenophilales	Hydrogenophilaceae	sf_2	8756	X97534.1	Halothiobacillus sp.	0.0440993	0.0540024	362	0.293498	0.269903	0.291091
Verrucomicrobia	Verrucomicrobiae	Verrucomicrobiales	Verrucomicrobiaceae	sf_6	613	AJ441222.1	hydrothermal vent polychaete mucous clone P. palm C 85	0.0441556	0.0540024	412.2	0.528444	0.0353483	0.135574
Firmicutes	Bacilli	Lactobacillales	Lactobacillaceae	sf_1	3914	AJ251560.1	Lactobacillus cypricasei str. LMK3	0.0442238	0.0540024	432	0.329197	0.213118	0.260291
Actinobacteria	Actinobacteria	Actinomycetales	Gordoniaceae	sf_1	1191	X80635.1	Gordonia amarae str. DSM43392	0.044236	0.0540024	262.8	0.627492	0.00926429	0.0964431
Proteobacteria	Alphaproteobacteria	Verorhodospirilla	Unclassified	sf_1	7109	AY189753.1	diesel-polluted Bohai Gulf isolate str. M-5 M-5	0.0443297	0.0540208	424.4	0.233836	0.383401	0.335177
Bacteroidetes	Sphingobacteria	Sphingobacteriales	Sphingobacteriaceae	sf_1	5913	AF409002.1	Sphingobacteriaceae str. Ellin160	0.0443874	0.0540208	305.8	0.281859	0.29023	0.298781
Proteobacteria	Gammaproteobacteria	Oceanospirillales	Alcanivoraceae	sf_1	8335	AB055205.1	Alcanivorax sp. str. K3-3 (MBIC 4323)	0.044571	0.0540782	411.6	0.269714	0.312388	0.30665
Proteobacteria	Gammaproteobacteria	Unclassified	Unclassified	sf_3	8646			0.0445711	0.0540782	381.8	0.383466	0.142598	0.226037
Spirochaetes	Spirochaetes	Spirochaetales	Spirochaetaceae	sf_1	6490	AB062823.1	termite gut homogenate clone BCf4-14	0.0447312	0.0541894	250	0.453684	0.0775509	0.179976
Proteobacteria	Deltaproteobacteria	Desulfovibrionales	Desulfovibrionaceae	sf_1	10262	AF228127.2	Desulfovibrio sp. str. Ac5.2	0.0452016	0.0545137	582.6	0.377035	0.149987	0.23107
Actinobacteria	Actinobacteria	Actinomycetales	Mycobacteriaceae	sf_1	1781	AF498650.1	Mycobacterium rhodesiae str. JS60	0.0452053	0.0545137	353	0.453093	0.0779865	0.180093
Actinobacteria	Actinobacteria	Actinomycetales	Mycobacteriaceae	sf_1	1885	AF480593.1	Mycobacterium neoaurum str. ATCC 25795	0.0452053	0.0545137	353	0.453093	0.0779865	0.180093
Actinobacteria	Actinobacteria	Rubrobacterales	Rubrobacteraceae	sf_1	1843	AJ536866.1	uranium mining waste pile soil sample clone JG30-KF-A23	0.0456082	0.054916	570.4	0.305605	0.249706	0.281245
Cyanobacteria	Unclassified	Unclassified	Unclassified	sf_9	5164	AB089123.1	termite gut homogenate clone Rs-H34	0.0459589	0.0552543	480.8	0.393797	0.131254	0.21648
Proteobacteria	Gammaproteobacteria	Pasteurellales	Pasteurellaceae	sf_1	9263	M75067.1	Actinobacillus capsulatus	0.0465052	0.0558264	525.2	0.373635	0.153997	0.232936
Firmicutes	Bacilli	Lactobacillales	Lactobacillaceae	sf_1	3874	AB018212.1	Pediococcus acidilactici str. E 7	0.0466054	0.0558508	331.4	0.235938	0.379016	0.333635
Actinobacteria	Actinobacteria	Actinomycetales	Corynebacteriaceae	sf_1	1820	U87823.1	Corynebacterium jeikeium str. ATCC 43734	0.0466665	0.0558508	665	0.459013	0.0737011	0.175242
Actinobacteria	Actinobacteria	Actinomycetales	Cellulomonadaceae	sf_1	1923	AJ229245.1	Actinobacteria str. VeCb6	0.0467405	0.055855	388.2	0.588947	0.016377	0.110234
Proteobacteria	Alphaproteobacteria	Rhodobacterales	Rhodobacteraceae	sf_1	7084	AF359546.1	Scrippsiella trochoidea NEPCC 15	0.0468241	0.0558706	313.4	0.39582	0.129108	0.216396
Spirochaetes	Spirochaetes	Spirochaetales	Spirochaetaceae	sf_1	6489	AJ458944.1	Mixotricha paradoxa is flagellate hindgut Mastotermes darwiniensis clone mp1 of	0.0471053	0.0561217	224	0.455246	0.0764081	0.178317
Spirochaetes	Spirochaetes	Spirochaetales	Spirochaetaceae	sf_1	6506	AB088911.1	termite gut homogenate clone Rs-J58 sp.	0.0473273	0.0563015	253.6	0.416993	0.108083	0.200871
Proteobacteria	Gammaproteobacteria	Unclassified	Unclassified	sf_4	8855			0.0477078	0.0566203	388.2	0.411631	0.113163	0.203601
Proteobacteria	Betaproteobacteria	Burkholderiales	Comamonadaceae	sf_1	7856	AY169431.1	Variovorax paradoxus	0.0477383	0.0566203	731.4	0.722025	0.00158684	0.0565381
Acidobacteria	Solibacteres	Unclassified	Unclassified	sf_1	6367	AF529104.1	TCE-contaminated site clone FTL227	0.0478582	0.0566539	391.8	0.426876	0.099143	0.194879
Spirochaetes	Spirochaetes	Spirochaetales	Spirochaetaceae	sf_1	6567	AB088859.2	termite gut homogenate clone Rs-A48 sp.	0.0479801	0.0566539	295.4	0.561478	0.0236235	0.122181
Bacteroidetes	Flavobacteria	Flavobacteriales	Unclassified	sf_3	5248	AY274839.1	Delaware River estuary clone 1G12	0.0480213	0.0566539	363.2	0.427182	0.0988751	0.194879
Proteobacteria	Gammaproteobacteria	Legionellales	Coxiellaceae	sf_3	9198	AJ295651.1	uranium mining waste pile clone KF-JG30-B15 KF-JG30-B15	0.0480526	0.0566539	392.2	0.33039	0.211365	0.260068
Proteobacteria	Gammaproteobacteria	Chromatiales	Chromatiaceae	sf_1	9571	M96395.1	Nitrosococcus oceanus	0.0481291	0.0566597	419	0.355933	0.176038	0.245157
DSS1	Unclassified	Unclassified	Unclassified	sf_2	38	AJ306783.1	DCP-dechlorinating consortium clone SHA-109	0.0482898	0.0567646	383.2	0.395685	0.129251	0.216396
Proteobacteria	Gammaproteobacteria	Pseudomonadales	Pseudomonadaceae	sf_1	8561	AF332541.1	Pseudomonas sp. B65	0.0485715	0.0570112	308.2	0.438422	0.0893777	0.190959
Bacteroidetes	Sphingobacteria	Sphingobacteriales	Crenotrichaceae	sf_11	6249	M58790.2	Haliscomenobacter hydrossis	0.049242	0.057624	313.6	0.269922	0.312	0.30665
Deferribacteres	Deferribacer	Unclassified	Unclassified	sf_1	797	AJ515881.1	Deferribacter abyssi str. DR	0.0492838	0.057624	470.8	0.316109	0.232963	0.272107
Actinobacteria	Actinobacteria	Actinomycetales	Actinomycetaceae	sf_1	1801	AF487679.1	Actinobaculum massiliae str. CIP 107404	0.0493118	0.057624	354.2	0.571214	0.0208187	0.117002
Actinobacteria	Actinobacteria	Actinomycetales	Micrococcaceae	sf_1	1266	AF134179.1	Arthrobacter psychrolactophilus	0.0494878	0.0577445	530	0.612539	0.0116527	0.0964431
Firmicutes	Unclassified	Unclassified	Unclassified	sf_8	546	AF282254.1	Ferribacter thermoautotrophicus	0.0495936	0.057778	486.8	0.294742	0.267785	0.290042
Actinobacteria	Actinobacteria	Actinomycetales	Cellulomonadaceae	sf_1	1586	X83800.1	Cellulomonas gelida str. DSM 20111T	0.0496658	0.057778	401.6	0.601207	0.0137655	0.104451
Proteobacteria	Gammaproteobacteria	Aeromonadales	Aeromonadaceae	sf_1	9000	AF170914.4	Aeromonas culicicola str. MTCC 3249	0.0497353	0.057778	529.4	0.217037	0.419425	0.350272
Actinobacteria	Actinobacteria	Actinomycetales	Streptomycetaceae	sf_1	1771	D63872.1	Streptomyces setonii str. ATCC25497	0.0501093	0.0581273	296.4	0.594514	0.0151472	0.108673
Actinobacteria	Actinobacteria	Actinomycetales	Mycobacteriaceae	sf_1	1204	M95488.1	Mycobacterium sp. 3	0.0508823	0.058509	387.8	0.523013	0.0376348	0.135933
Actinobacteria	Actinobacteria	Actinomycetales	Unclassified	sf_3	1243	AB089076.1	termite gut homogenate clone Rs-M95 bacterium	0.0508954	0.058509	574.8	0.538355	0.031448	0.131714
Actinobacteria	Actinobacteria	Actinomycetales	Actinomycetaceae	sf_1	2049	AJ234059.1	Arcanobacterium haemolyticum str. CIP 103370	0.0514556	0.0587429	365	0.508262	0.0444084	0.146021
DSS1	Unclassified	Unclassified	Unclassified	sf_1	4405	AF323768.2	benzoate-degrading consortium clone BA143	0.0518765	0.0590364	375.4	0.536068	0.0323174	0.132337
Actinobacteria	Actinobacteria	Actinomycetales	Actinomycetaceae	sf_1	1672	AJ234041.1	Actinomyces odontolyticus str. CCUG 28084	0.0523723	0.0593617	741.6	0.546846	0.028375	0.128555
Actinobacteria	Actinobacteria	Actinomycetales	Microbacteriaceae	sf_1	1758	AF479358.1	glacial ice isolate str. SB12K-2-1	0.0525407	0.0593827	350.6	0.560227	0.0240041	0.122181
Actinobacteria	Actinobacteria	Actinomycetales	Promicromonosporaceae	sf_1	1671	X79453.1	Cellulosimicrobium cellulans str. NCIMB 11025	0.053064	0.0597008	480.8	0.620586	0.0103139	0.0964431
Bacteroidetes	Sphingobacteria	Sphingobacteriales	Sphingobacteriaceae	sf_1	5492	AF492000.1	Sphingobacterium sp. str. HC-6155	0.0531235	0.0597008	355.2	0.510795	0.0431853	0.143282
Actinobacteria	Actinobacteria	Actinomycetales	Cellulomonadaceae	sf_1	1431	AB078838.1	Cellulomonadaceae str. W6	0.0533774	0.0597731	367.8	0.616083	0.0110472	0.0964431
Actinobacteria	Actinobacteria	Actinomycetales	Geodermatophilaceae	sf_1	1694	X92355.1	Geodermatophilus obscurus subsp. dictyosporus str. DSM 43161	0.0541201	0.0601772	235.4	0.612761	0.0116139	0.0964431
Actinobacteria	Actinobacteria	Actinomycetales	Streptomycetaceae	sf_1	1617	AF423260.1	soil clone 41-1	0.0542959	0.0601772	403.8	0.574364	0.0199685	0.114744
Nitrospira	Nitrospira	Nitrospirales	Nitrospiraceae	sf_1	984	AJ519405.1	uranium mining waste pile clone JG37-AG-131 sp.	0.0547108	0.0602036	619	0.529612	0.0348704	0.134774
Nitrospira	Nitrospira	Nitrospirales	Nitrospiraceae	sf_1	179	AF407702.1	Great Artesian Basin clone G19	0.0554536	0.0605167	513.4	0.543912	0.0294099	0.128555
Acidobacteria	Acidobacteria-4	Ellin6075/11-25	Unclassified	sf_1	790	Z95709.1	soil clone 11-25	0.0555969	0.0605897	430.2	0.625174	0.00960671	0.0964431
Actinobacteria	Actinobacteria	Actinomycetales	Micrococcaceae	sf_1	1557	X83408.1	Arthrobacter oxydans str. DSM 20119	0.0559465	0.0608868	494	0.613	0.0115724	0.0964431
Acidobacteria	Acidobacteria	Acidobacteriales	Acidobacteriaceae	sf_14	508	AJ519382.1	uranium mining waste pile clone JG37-AG-81 sp.	0.0573234	0.0620445	550.2	0.515024	0.0411988	0.141942
Actinobacteria	Actinobacteria	Actinomycetales	Dermabacteraceae	sf_1	1504	AJ415380.1	Brachybacterium sacelli str. LMG 20338	0.0585371	0.0629293	326.6	0.577509	0.0191467	0.112562
Verrucomicrobia	Verrucomicrobiae	Verrucomicrobiales	Verrucomicrobia subdivision 5	sf_1	530	AY114334.1	anoxic marine sediment clone LD1-PB20	0.0587063	0.0629374	623.2	0.588099	0.0165709	0.110234
Actinobacteria	Actinobacteria	Actinomycetales	Micrococcaceae	sf_1	1889	AB094464.1	Citricoccus sp. str. 2216.25.22	0.0598977	0.063444	516	0.62137	0.0101902	0.0964431
Actinobacteria	Actinobacteria	Actinomycetales	Pseudonocardiaceae	sf_1	1863			0.060023	0.0634918	605.4	0.542214	0.0300216	0.129178
Actinobacteria	Actinobacteria	Actinomycetales	Kineosporiaceae	sf_1	1961	X77958.1	Kineococcus aurantiacus str. IFO 15268	0.0601895	0.063569	490.4	0.596068	0.0148173	0.107673
Actinobacteria	Actinobacteria	Actinomycetales	Microbacteriaceae	sf_1	1667	AB007415.1	Microbacterium lacticum	0.0609734	0.0640512	411.6	0.580304	0.0184388	0.112173
Verrucomicrobia	Verrucomicrobiae	Verrucomicrobiales	Verrucomicrobia subdivision 5	sf_1	629	AY114328.1	anoxic marine sediment clone LD1-PA50	0.061643	0.0644613	551.4	0.592581	0.0155658	0.108673
Actinobacteria	Actinobacteria	Bifidobacteriales	Bifidobacteriaceae	sf_1	1967	D86187.1	Bifidobacterium pseudocatenulatum str. JCM1200	0.0624593	0.0649466	933	0.587498	0.0167097	0.110234
Actinobacteria	Actinobacteria	Actinomycetales	Actinomycetaceae	sf_1	1227	AB062278.1	Actinomyces naeslundii	0.0624762	0.0649466	716.4	0.545092	0.0289904	0.128555
Gemmatimonadetes	Unclassified	Unclassified	Unclassified	sf_5	317	AY218696.1	penguin droppings sediments clone KD8-87	0.062566	0.0649466	813.4	0.5554	0.0255166	0.123278
Actinobacteria	Actinobacteria	Actinomycetales	Cellulomonadaceae	sf_1	1589	X83806.1	Oerskovia turbata str. DSM 20577T	0.0626279	0.0649466	377.4	0.541162	0.0304053	0.13032
Actinobacteria	Actinobacteria	Actinomycetales	Cellulomonadaceae	sf_1	1449	AB078851.1	Cellulomonadaceae str. WB13	0.0631038	0.0651209	304	0.526134	0.0363076	0.135574
Actinobacteria	Actinobacteria	Actinomycetales	Mycobacteriaceae	sf_1	1308	AJ431371.1	Mycobacterium pyrenivorans str. DSM 44605	0.064718	0.0661615	315.6	0.498315	0.0494656	0.1522
Actinobacteria	Actinobacteria	Actinomycetales	Streptosporangiaceae	sf_1	1224	X89941.1	Acrocarpospora corrugata str. DSM43316T	0.0668923	0.067859	316.4	0.565936	0.0223051	0.122181
Actinobacteria	Actinobacteria	Actinomycetales	Streptosporangiaceae	sf_1	2037	AF302078.1	Nonomuraea terrinata str. DSM 44505	0.0673974	0.0681967	292.4	0.582106	0.0179932	0.111264
Actinobacteria	Actinobacteria	Bifidobacteriales	Bifidobacteriaceae	sf_1	2040	AF275881.1	Bifidobacterium adolescentis str. E-981074T	0.0681069	0.0686696	990.4	0.586031	0.0170514	0.110486
Verrucomicrobia	Verrucomicrobiae	Verrucomicrobiales	Verrucomicrobia subdivision 5	sf_1	547	AY114329.1	anoxic marine sediment clone LD1-PB1	0.0686576	0.0690311	599.4	0.559594	0.0241982	0.122194
Proteobacteria	Deltaproteobacteria	Desulfovibrionales	Desulfohalobiaceae	sf_1	10069			0.0705203	0.0701913	430	0.54742	0.028176	0.128555
Actinobacteria	Actinobacteria	Actinomycetales	Nocardiaceae	sf_1	1787	AF430046.1	Nocardia pseudovaccinii str. DSM 43406	0.0721612	0.0714669	319.4	0.561927	0.0234881	0.122181
Proteobacteria	Gammaproteobacteria	Alteromonadales	Alteromonadaceae	sf_1	8484	AF513454.1	Alteromonadaceae isolate str. LA50	0.072989	0.0716583	352.8	0.560612	0.0238863	0.122181
Actinobacteria	Actinobacteria	Actinomycetales	Nocardiaceae	sf_1	1432	AF430055.1	Nocardia veterana str. DSM 44445	0.0741759	0.0723425	259.2	0.522709	0.037766	0.135933
Coprothermobacteria	Unclassified	Unclassified	Unclassified	sf_1	751	AJ431258.1	Coprothermobacter sp. str. Dex80-3	0.0742457	0.0723425	481	0.50676	0.0451466	0.14624
NC10	NC10-1	Unclassified	Unclassified	sf_1	536	AJ519669.1	uranium mill tailings clone GuBH2-AD-8	0.0742653	0.0723425	509.2	0.502793	0.0471389	0.148717
Actinobacteria	Actinobacteria	Bifidobacteriales	Bifidobacteriaceae	sf_1	1109	AY148470.1	Bifidobacterium thermacidophilum porcinum subsp. suis str. P3-14 subsp.	0.0745172	0.0723425	1034.6	0.579676	0.018596	0.112173
Proteobacteria	Betaproteobacteria	Rhodocyclales	Rhodocyclaceae	sf_1	7956			0.0747304	0.0723425	537.2	0.509833	0.043647	0.14438
Actinobacteria	Actinobacteria	Actinomycetales	Nocardiaceae	sf_1	1304	AF421564.1	Nocardia sp. str. 99-08-244A	0.0779723	0.0743295	363.2	0.503431	0.0468138	0.148607
Actinobacteria	Actinobacteria	Actinomycetales	Microbacteriaceae	sf_1	1197	AF468440.1	Arctic sea ice ARK10173	0.0781675	0.0743295	492.2	0.56127	0.0236866	0.122181
Spirochaetes	Spirochaetes	Spirochaetales	Spirochaetaceae	sf_1	6571	AJ458946.1	Mixotricha paradoxa is flagellate hindgut Mastotermes darwiniensis clone mp4 of	0.0783775	0.0743295	278.4	0.501318	0.0478958	0.149833
Actinobacteria	Actinobacteria	Actinomycetales	Nocardiaceae	sf_1	1805	AJ303008.1	Nocardia ignorata str. IMMIB R-1434 DSM 44496 = NRRL B-24141	0.0784584	0.0743295	368	0.511066	0.0430556	0.143282
Actinobacteria	Actinobacteria	Actinomycetales	Pseudonocardiaceae	sf_1	1849			0.0814716	0.0766613	385.4	0.542846	0.0297927	0.128696
Actinobacteria	Actinobacteria	Acidimicrobiales	Microthrixineae	sf_1	1964	AF406548.1	bacterioplankton clone AEGEAN_247	0.0832702	0.0778912	342	0.573854	0.0201043	0.114744
Actinobacteria	Actinobacteria	Bifidobacteriales	Bifidobacteriaceae	sf_1	1835	AY513712.1	Bifidobacterium breve str. KB 92	0.0839908	0.0784726	1002.2	0.562022	0.0234596	0.122181
Firmicutes	Clostridia	Clostridiales	Peptostreptococcaceae	sf_5	837	D14147.1	Peptoniphilus indolicus str. ATCC29427 GIFU 7848	0.0844069	0.078719	655.8	0.505747	0.0456489	0.14624
Actinobacteria	Actinobacteria	Bifidobacteriales	Bifidobacteriaceae	sf_1	1875			0.0862855	0.0797108	984.2	0.559284	0.0242939	0.122194
Firmicutes	Bacilli	Lactobacillales	Lactobacillaceae	sf_1	3885	M58834.1	Pediococcus pentosaceus	0.0866845	0.0799522	721.6	0.507337	0.0448621	0.14624
Proteobacteria	Alphaproteobacteria	Rhodobacterales	Rhodobacteraceae	sf_1	7140	AJ582228.1	Loktanella salsilacus str. LMG 22000	0.0867953	0.0799613	329.4	0.579518	0.0186357	0.112173
Actinobacteria	Actinobacteria	Bifidobacteriales	Bifidobacteriaceae	sf_1	1351	AY174108.1	Bifidobacterium psychraerophilum str. T16	0.0870512	0.0800185	636.4	0.583936	0.0175491	0.111264
Planctomycetes	Planctomycetacia	Planctomycetales	Planctomycetaceae	sf_3	4855	BX294726.1	aerobic basin clone CY0ARA026D10	0.0888969	0.0811427	570	0.528036	0.0355163	0.135574
Actinobacteria	Actinobacteria	Actinomycetales	Kineosporiaceae	sf_1	1598	AY250880.1	lichen-dominated Antarctic cryptoendolithic community clone FBP402	0.0895384	0.0814794	448.8	0.539558	0.030998	0.130904
Verrucomicrobia	Verrucomicrobiae	Verrucomicrobiales	Unclassified	sf_3	792	AB089122.1	termite gut homogenate clone Rs-P07 bacterium	0.0924077	0.0830084	585.4	0.531871	0.0339606	0.134106
Actinobacteria	Actinobacteria	Bifidobacteriales	Bifidobacteriaceae	sf_1	1704			0.0962767	0.0854484	390.2	0.536942	0.031983	0.131948
Actinobacteria	Actinobacteria	Actinomycetales	Micrococcaceae	sf_1	2019	AF057289.1	Micrococcus luteus str. HN2-11	0.0966729	0.085674	391.4	0.532268	0.0338023	0.134106
Actinobacteria	Actinobacteria	Actinomycetales	Microbacteriaceae	sf_1	1804	AY244784.1	Microbacterium resistens str. 2002-59119	0.0990588	0.0871065	346	0.517781	0.0399412	0.140116
Actinobacteria	Actinobacteria	Actinomycetales	Streptomycetaceae	sf_1	1786	X79851.1	Streptomyces bikiniensis str. DSM40581	0.107405	0.0918961	318.2	0.506243	0.0454022	0.14624
Actinobacteria	Actinobacteria	Actinomycetales	Unclassified	sf_3	1577	AB089072.1	termite gut homogenate clone Rs-N91 bacterium	0.108364	0.0923179	457.6	0.560013	0.0240695	0.122181
Proteobacteria	Alphaproteobacteria	Rickettsiales	Anaplasmataceae	sf_3	6803	AY007547.1	Wolbachia sp. Dlem16SWol	0.111997	0.0945984	335.4	0.597496	0.0145189	0.106936
Proteobacteria	Gammaproteobacteria	Pasteurellales	Pasteurellaceae	sf_1	8952	M75068.1	Actinobacillus lignieresii	0.112899	0.0949557	786	0.507392	0.044835	0.14624
Actinobacteria	Actinobacteria	Actinomycetales	Micrococcaceae	sf_1	1610	X86595.1	Arthrobacter sp str. AC-51	0.113631	0.0953693	300.6	0.533872	0.0331694	0.134106
Actinobacteria	Actinobacteria	Actinomycetales	Streptomycetaceae	sf_1	1983	AJ399487.1	Streptomyces cinnabarinus str. ISP 5467	0.116441	0.0967026	255.6	0.499473	0.0488559	0.151381
Actinobacteria	Actinobacteria	Actinomycetales	Dermabacteraceae	sf_1	2053	X91033.1	Brachybacterium nesterenkovii str. DSM 9573	0.120769	0.0994633	353.6	0.546541	0.0284814	0.128555
Unclassified	Unclassified	Unclassified	Unclassified	sf_34	4668			0.123362	0.100657	861.2	0.505128	0.0459582	0.146722
Actinobacteria	Actinobacteria	Actinomycetales	Unclassified	sf_3	1514			0.124798	0.101437	207.8	0.505705	0.0456698	0.14624
Proteobacteria	Alphaproteobacteria	Rickettsiales	Anaplasmataceae	sf_3	7481	AF179630.1	Wolbachia pipientis	0.132235	0.105506	348	0.612126	0.0117249	0.0964431
Actinobacteria	Actinobacteria	Actinomycetales	Kineosporiaceae	sf_1	1893	AF095336.1	Kineosporia aurantiaca str. NRLL B-16913	0.135247	0.107477	326.4	0.506645	0.045203	0.14624
Actinobacteria	Actinobacteria	Actinomycetales	Unclassified	sf_3	1405	X80744.1	Arthrobacter ureafaciens str. DSM 20126	0.136371	0.108262	471.2	0.505829	0.0456082	0.14624
Actinobacteria	Actinobacteria	Actinomycetales	Promicromonosporaceae	sf_1	1711	AJ272024.1	Promicromonospora sukumoe str. DSM 44121	0.142629	0.112217	321.2	0.548763	0.0277141	0.128555
Proteobacteria	Betaproteobacteria	Rhodocyclales	Rhodocyclaceae	sf_1	7779			0.153617	0.117974	229.6	0.58134	0.0181815	0.111264
Actinobacteria	Actinobacteria	Bifidobacteriales	Bifidobacteriaceae	sf_1	1335	S83624.1	Bifidobacterium bifidum	0.154092	0.118185	1260.2	0.544691	0.0291322	0.128555
Proteobacteria	Unclassified	Unclassified	Unclassified	sf_28	10091			0.236771	0.160608	301.6	0.527491	0.0357417	0.135574
Firmicutes	Clostridia	Clostridiales	Lachnospiraceae	sf_5	2747	AF371559.1	swine intestine clone p-3075-SwA5	0.339452	0.208483	-292.6	-0.504871	0.0460869	0.146722
Bacteroidetes	Bacteroidetes	Bacteroidales	Porphyromonadaceae	sf_1	5806	AY169416.1	Bacteroides merdae	0.3579	0.214981	-176.4	-0.526908	0.0359839	0.135574
Proteobacteria	Gammaproteobacteria	Thiotrichales	Piscirickettsiaceae	sf_3	9392	AJ244761.1	Methylophaga sp. str. V4.ME.29 = MM_2343	0.390857	0.225543	192.6	0.511163	0.0430094	0.143282
Bacteroidetes	Bacteroidetes	Bacteroidales	Bacteroidaceae	sf_12	5551	L16486.1	Bacteroides uniformis	0.568315	0.282863	-339.4	-0.537869	0.0316314	0.131948
	Significant (p < 0.05) correlation with LGG, italics indicates that this correlation was negative. Taxa are sorted by T test significance and those above the horizontal line are significant, bold indicates that the change in mean abundance was greater than 1000 fluorescence units.
*	Greengenes database identifiers for subfamily and taxon respectively.
